# Supplementary material for: Metal-free photocatalysts with charge-transfer excited states enable visible light-driven atom transfer radical polymerization
Source: Royal Society of Chemistry journal article supplement (doi:10.1039/d4cc04470c), 2024-01-01
Supplement: d4cc04470c1.pdf [file d4cc04470c1.pdf]

## Electronic Supporting Information

### Metal-free photocatalysts with charge-transfer excited states enable visible light-driven atom transfer radical polymerization

Yuchen Huang,<sup>a,b</sup> Yangxin Liu,<sup>a,b</sup> Yingde Yan,<sup>a,b</sup> Yanjun Gong,<sup>c</sup> Yifan Zhang,<sup>a,d\*</sup>  
Yanke Che,<sup>a,b</sup> and Jincai Zhao<sup>a,b</sup>

<sup>a</sup> Key Laboratory of Photochemistry, CAS Research/Education Center for Excellence in Molecular Sciences, Institute of Chemistry, Chinese Academy of Sciences, Beijing 100190, China.

<sup>b</sup> University of Chinese Academy of Sciences, Beijing 100049, China.

<sup>c</sup> School of Chemistry and Chemical Engineering, Shandong University, Jinan 250100, P. R. China.

<sup>d</sup> Key Laboratory of Green Catalysis of Higher Education Institutes of Sichuan, School of Chemistry and Environmental Engineering, Sichuan University of Science and Engineering, Zigong 643000, P. R. China.

### Table of contents

1. Synthesis of photocatalysts **1-3**
2. Experimental methods
3. Other supporting figures and tables
4. Atom coordinates
5. References

## 1. Synthesis of photocatalysts PC1-PC3

### 1.1 Synthesis of photocatalyst 1 (PC1).

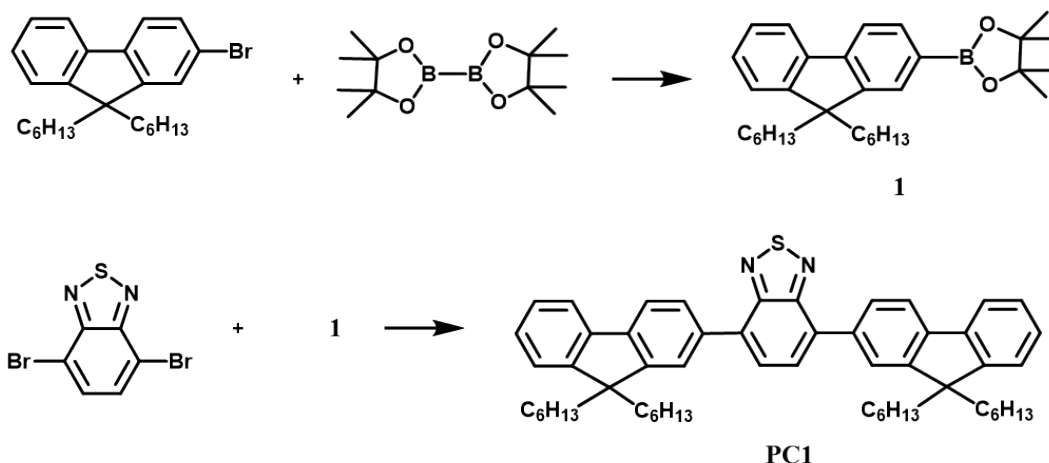

**2-(9,9-dihexyl-9H-fluoren-2-yl)-4,4,5,5-tetramethyl-1,3,2-dioxaborolane (1).** A mixture of 2,7-bromo-9,9-dihexyl-9H-fluorene (580 mg, 1.40 mmol), bis(pinacolato)diboron (540 mg, 2.1 mmol), potassium acetate (410 mg, 5.6 mmol) and Pd(dppf)Cl<sub>2</sub> (100 mg, 0.14 mmol) in deoxygenated 1,4-dioxane (50 mL) was stirred at 85 °C under Ar for 20 h. The solvent was evaporated under vacuum. The residue was poured into water (80 mL) and extracted with ethyl acetate (3 × 40 mL). The combined organic layers were washed with brine (saturated), dried over Na<sub>2</sub>SO<sub>4</sub>, and concentrated under vacuum. The residue was purified by column chromatography on the silica gel (dichloromethane as the eluent) to afford **1** (540 mg, 1.17 mmol, 84% yield).

**4,7-bis(9,9-dihexyl-9H-fluoren-2-yl)benzo[c][1,2,5]thiadiazole (PC1).** To a mixture of **1** (320 mg, 0.70 mmol), 4,7-dibromobenzo[c][1,2,5]thiadiazole (89 mg, 0.30 mmol), tetrakis(triphenylphosphine)palladium (35 mg, 0.03 mmol) in deoxygenated 1,4-dioxane (35 mL), an aqueous solution of potassium carbonate (8 mL, 4.0 M) was added. Then the mixture was heated to 85 °C and stirred under Ar for 8 h. The solvent was evaporated under vacuum. The residue was poured into water (80 mL) and extracted with dichloromethane (3 × 40 mL). The combined organic layers were washed with brine (saturated), dried over Na<sub>2</sub>SO<sub>4</sub>, and concentrated under vacuum. The residue was purified by column chromatography on the silica gel (dichloromethane as the eluent) to afford **PC1** (220 mg, 0.28 mmol, 93% yield).

**PC1** <sup>1</sup>H NMR (400 MHz, THF-*d*<sub>8</sub>) δ 8.16 (d, *J* = 1.6 Hz, 2H), 8.05 (dd, *J* = 7.9, 1.6 Hz, 2H), 7.98 (s, 2H), 7.88 (d, *J* = 7.9 Hz, 2H), 7.82 – 7.77 (m, 2H), 7.42 (dd, *J* = 6.9, 1.7 Hz, 2H), 7.36 – 7.32 (m, 2H), 7.32 – 7.26 (m, 2H), 2.25 – 1.96 (m, 8H), 1.20 – 1.03 (m, 24H), 0.781-0.79 (m, 8H), 0.76 (d, *J* = 7.2 Hz, 12H). MALDI-MS: (*m/z*) = 800.5.

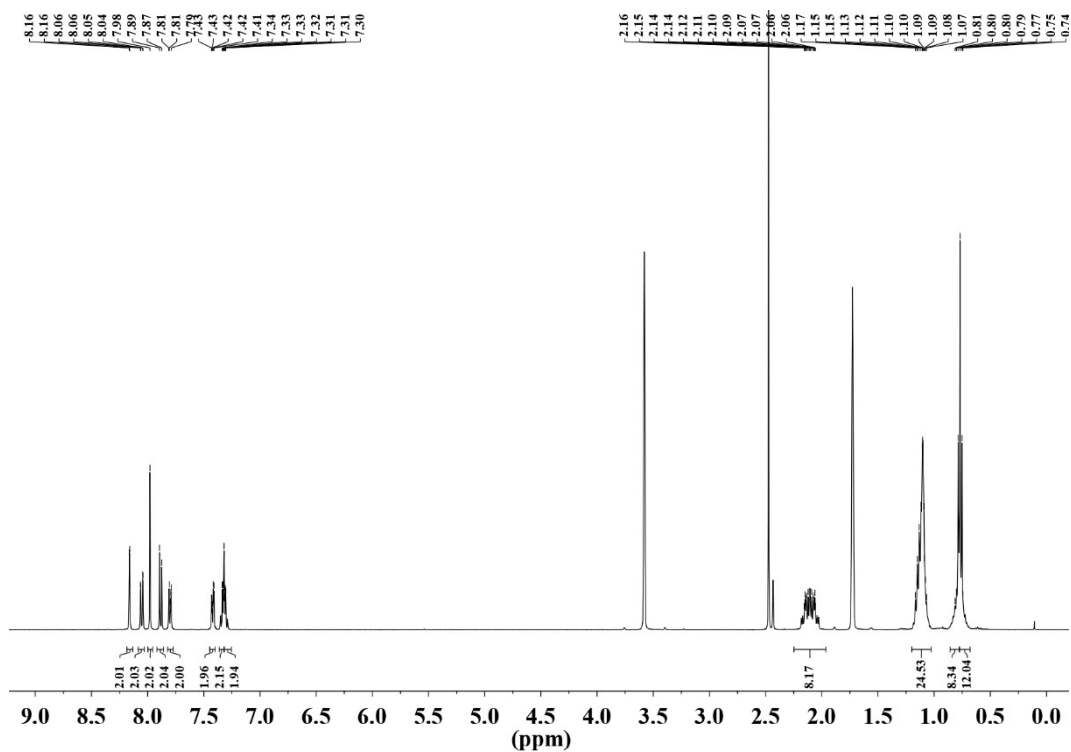

Figure S1.  $^1\text{H}$  NMR spectrum of PC1.

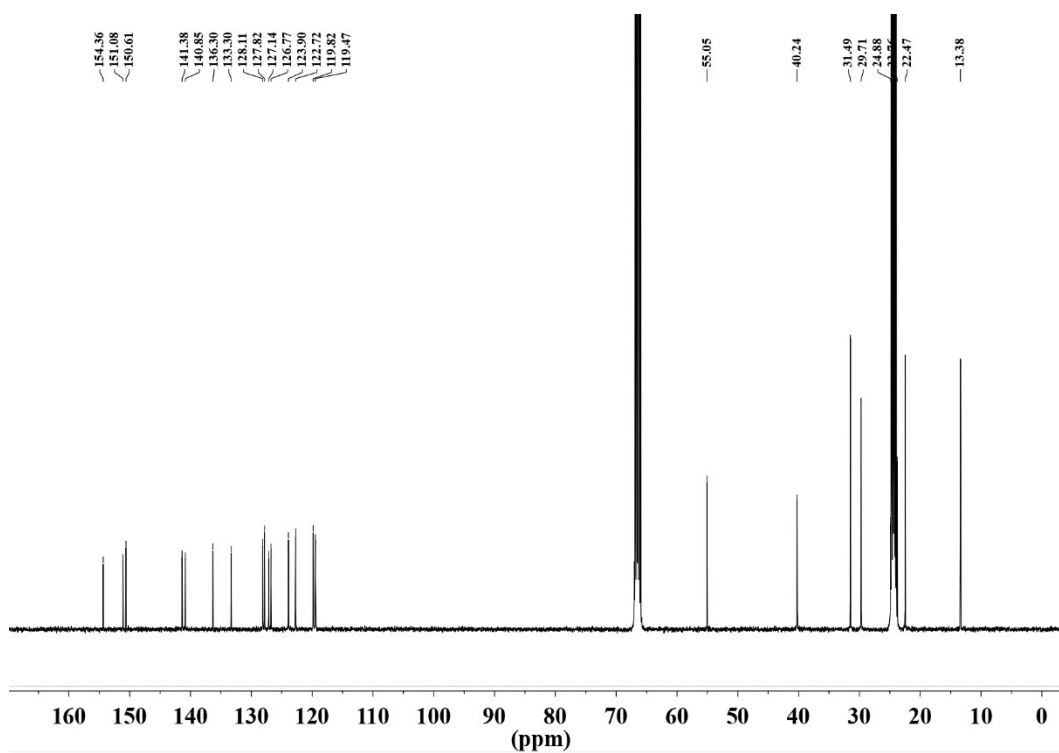

Figure S2.  $^{13}\text{C}$  NMR spectrum of PC1.

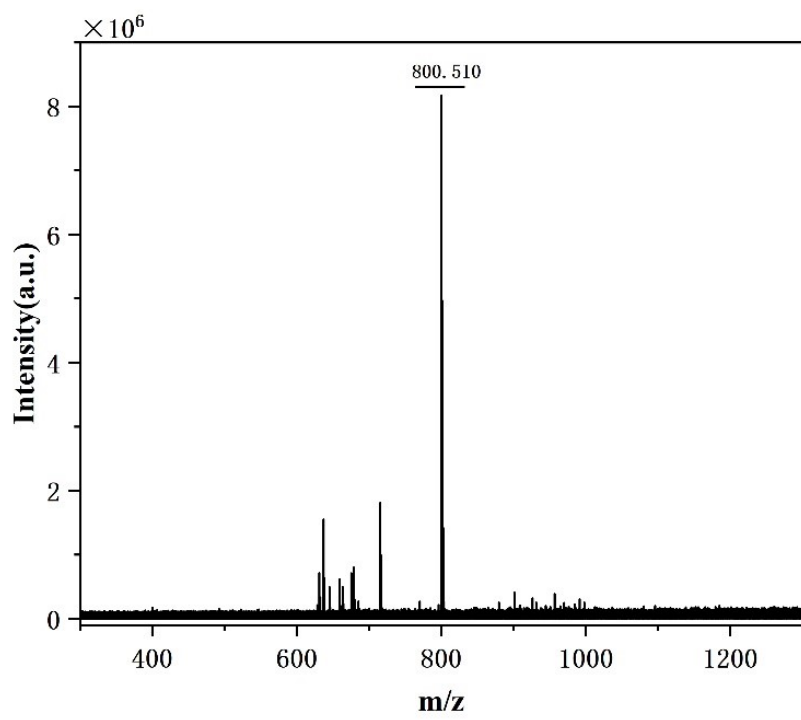

**Figure S3.** MALDI-TOF mass spectrum of PC1.

## 1.2 Synthesis of photocatalyst 2 (PC2).

The synthesis of PC2 was performed by following the previously reported method<sup>1</sup>.

**PC2** <sup>1</sup>H NMR (400 MHz, Chloroform-d)  $\delta$  8.06 (dd,  $J = 7.8, 1.6$  Hz, 2H), 8.01 (d,  $J = 1.6$  Hz, 2H), 7.92 (d,  $J = 6.1$  Hz, 4H), 7.86 (d,  $J = 7.8$  Hz, 2H), 7.79 (t,  $J = 9.2$  Hz, 4H), 7.68 (d,  $J = 6.1$  Hz, 6H), 7.66 – 7.59 (m, 6H), 7.59 – 7.52 (m, 4H), 7.07 – 7.00 (m, 4H), 3.89 (s, 6H), 2.22 – 1.97 (m, 16H), 1.20 – 1.04 (m, 49H), 0.85 (d,  $J = 36.4$  Hz, 16H), 0.79 – 0.70 (m, 24H). MALDI-MS: (m/z) = 1676.1.

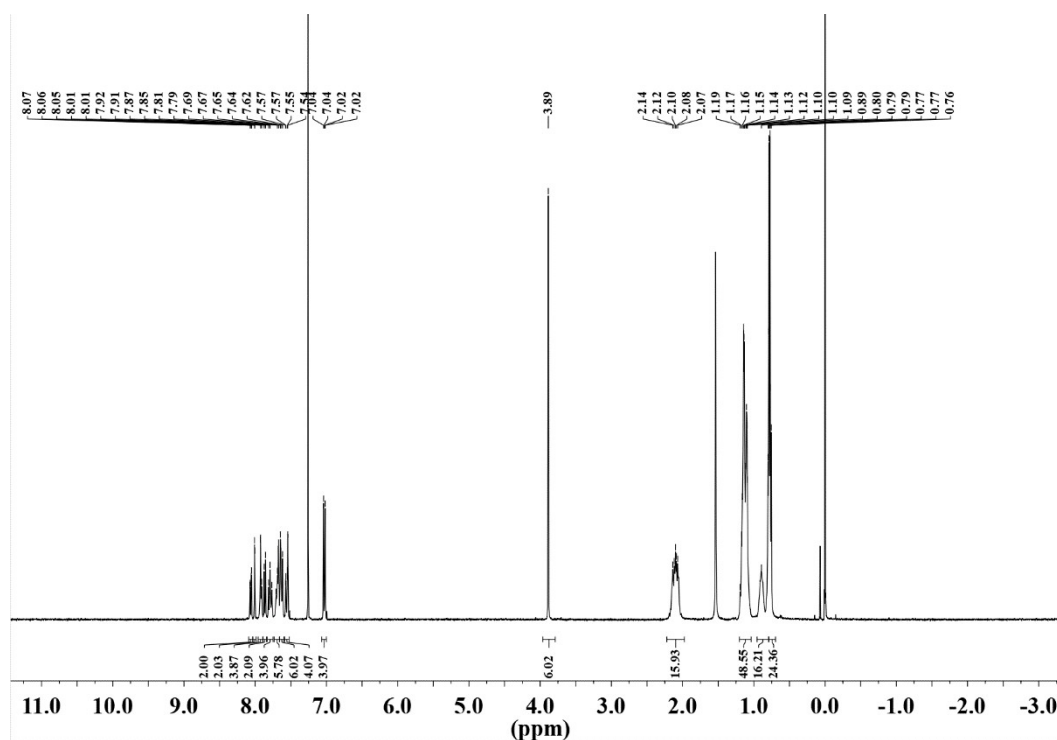

Figure S4. <sup>1</sup>H NMR spectrum of PC2.

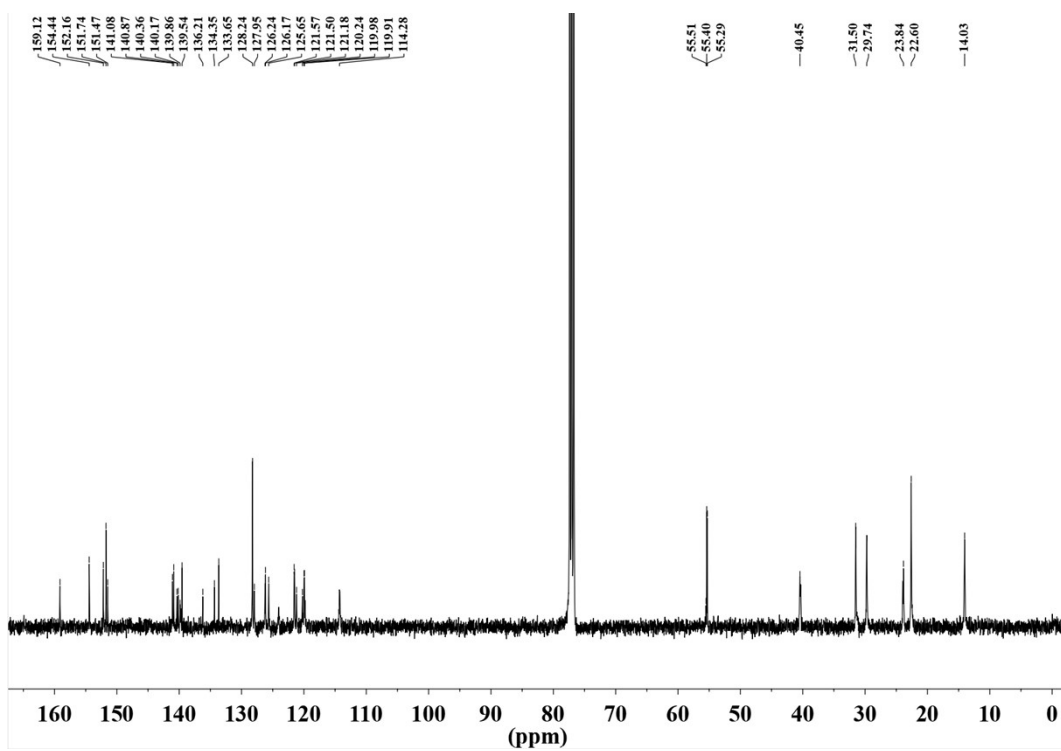

**Figure S5.**  $^{13}\text{C}$  NMR spectrum of PC2.

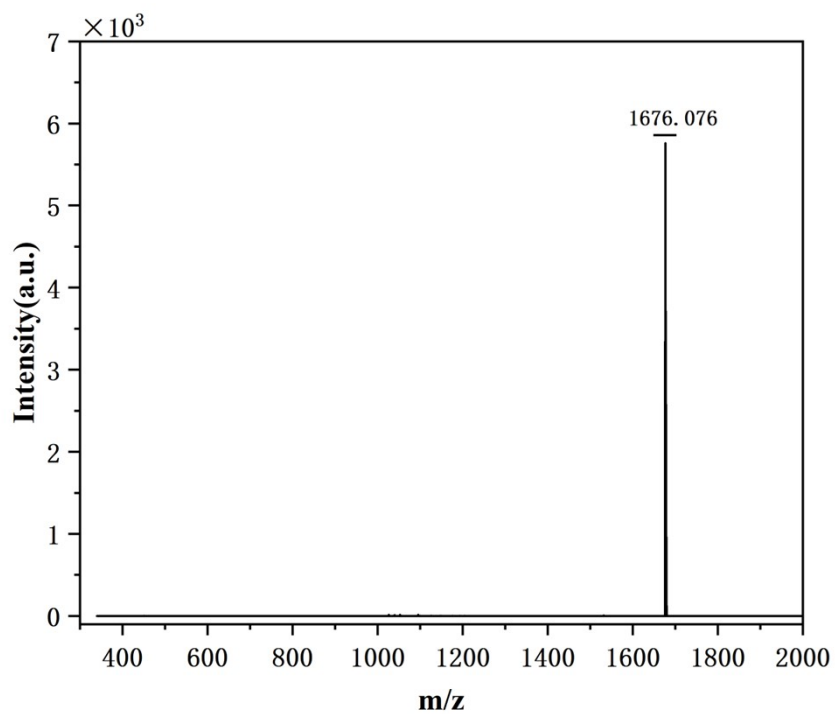

**Figure S6** MALDI-TOF mass spectrum of PC2.

### 1.3 Synthesis of photocatalyst 3 (PC3).

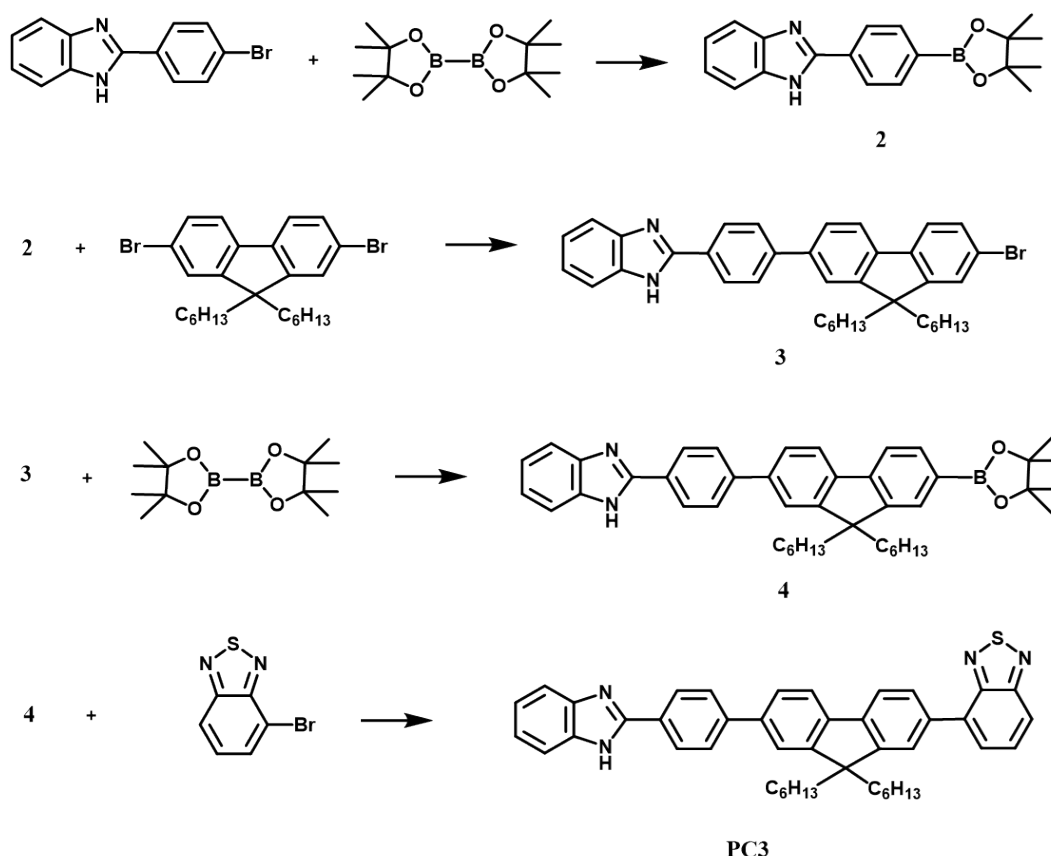

**2-(4-(4,4,5,5-tetramethyl-1,3,2-dioxaborolan-2-yl)phenyl)-1H-benzo[d]imidazole (2)**. A mixture of 2-(4-bromophenyl)-1H-benzo[d]imidazole (2.00 g, 7.32 mmol), bis(pinacolato)diboron (2.70 g, 10.6 mmol), potassium acetate (2.15 g, 21.9 mmol) and Pd(dppf)Cl<sub>2</sub> (260 mg, 0.36 mmol) in deoxygenated 1,4-dioxane (40 mL) was stirred at 85°C under argon overnight. The solvent was evaporated under vacuum. The residue was poured into water (80 mL) and extracted with ethyl acetate (3 × 40 mL). The combined organic layers were washed with brine (saturated), dried over Na<sub>2</sub>SO<sub>4</sub>, and concentrated under vacuum. The residue was purified by column chromatography on the silica gel (petroleum: ethyl acetate = 10:1 as the eluent) to afford **2** (2.10 g, 6.01 mmol, 86% yield).

Molecule **2** <sup>1</sup>H NMR (400 MHz, DMSO-d<sub>6</sub>) δ 8.20 (d, J = 7.7 Hz, 2H), 7.84 (d, J = 7.8 Hz, 2H), 7.60 (s, 2H), 7.22 (dd, J = 6.1, 3.1 Hz, 2H), 1.33 (s, 12H).

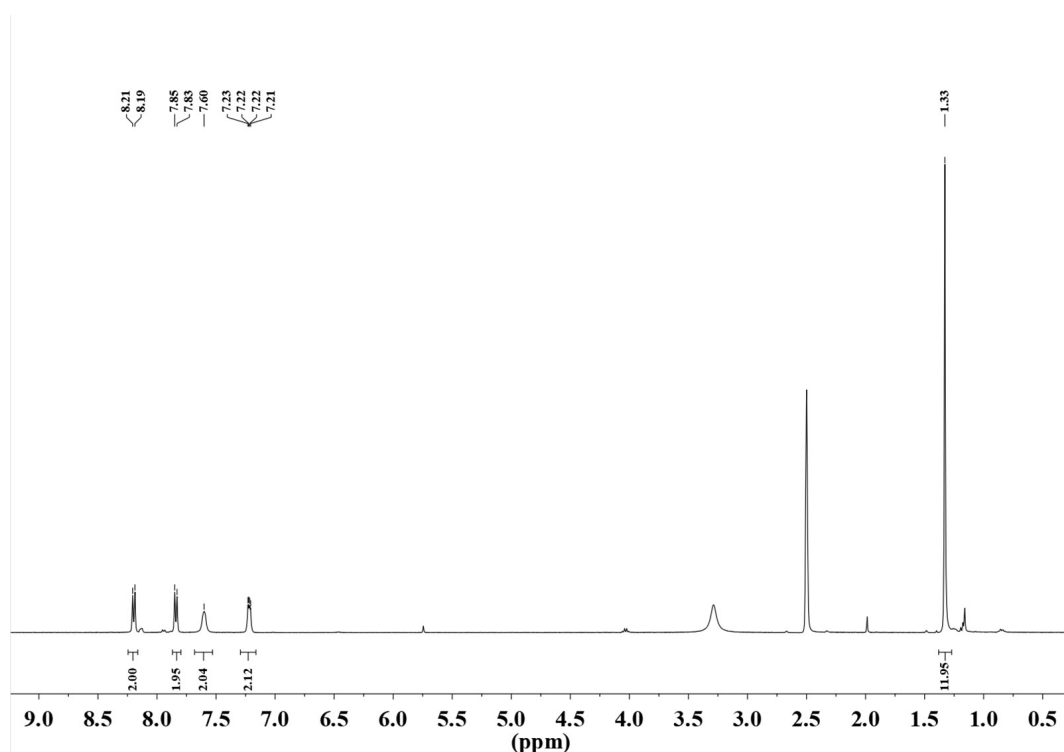

**Figure S7.**  $^1\text{H}$  NMR spectrum of molecule **2**.

**2-(4-(7-bromo-9,9-dihexyl-9H-fluoren-2-yl)phenyl)-1H-benzo[d]imidazole (3).** To a stirred solution of **2** (2.00 g, 6.25 mmol), 2,7-dibromo-9,9-dihexyl-9H-fluorene (4.6 g, 9.34 mmol), and tetrakis(triphenylphosphine)palladium (360 mg, 0.31 mmol) in deoxygenated 1,4-dioxane (40 mL), an aqueous solution of potassium carbonate (8 mL, 2.0 M) was added. Then the mixture was heated to 85 °C and stirred under argon overnight. The solvent was evaporated under vacuum. The residue was poured into water (80 mL) and extracted with dichloromethane (3 × 40 mL). The combined organic layer was washed with brine (saturated), dried over  $\text{Na}_2\text{SO}_4$ , and concentrated under vacuum. The residue was purified by column chromatography on silica gel (petroleum: ethyl acetate = 5:1 as the eluent) to afford **3** (2.65 g, 4.38 mmol, 70% yield).

Molecule **3**  $^1\text{H}$  NMR (400 MHz, THF- $d_8$ )  $\delta$  11.80 (s, 1H), 8.28 – 8.22 (d, 2H), 7.83 (d,  $J = 8.5$  Hz, 3H), 7.76 – 7.66 (m, 3H), 7.60 (m,  $J = 2.0$  Hz, 2H), 7.49 (m,  $J = 8.1, 1.9$  Hz, 2H), 7.15 (m,  $J = 6.1, 3.1$  Hz, 2H), 2.10 (td,  $J = 9.2, 6.1$  Hz, 4H), 1.12 (q,  $J = 7.4$  Hz, 12H), 0.71 (s, 4H), 0.65 (d,  $J = 11.3$  Hz, 6H). MALDI-MS: ( $m/z$ ) = 605.1



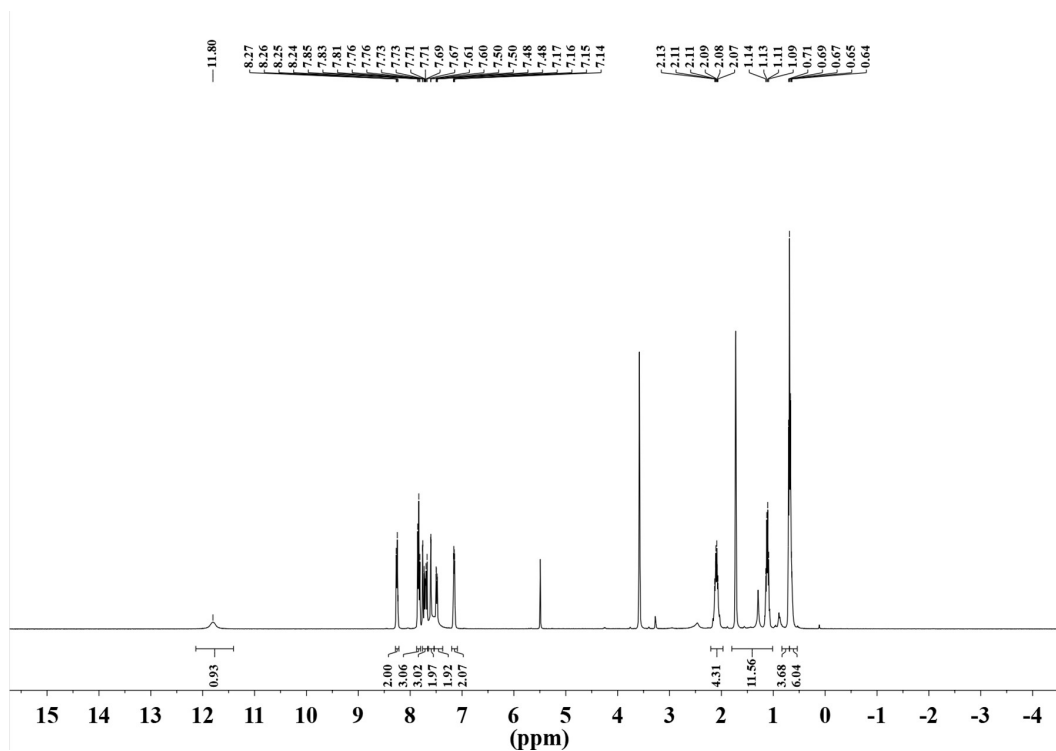

Figure S8.  $^1\text{H}$  NMR spectrum of molecule **3**.

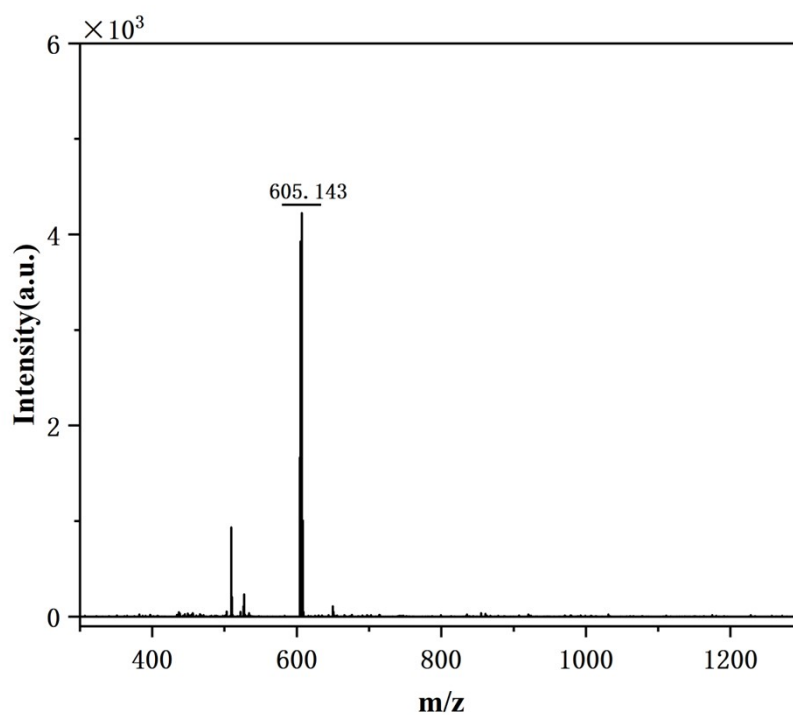

Figure S9. MALDI-TOF mass spectrum of molecule **3**.

2-(4-(9,9-dihexyl-7-(4,4,5,5-tetramethyl-1,3,2-dioxaborolan-2-yl)-9H-fluoren-2-yl)phenyl)-1H-benzo[d]imidazole (**4**). A mixture of **3** (880 mg, 1.45 mmol),

bis(pinacolato)diboron (550 mg, 2.16 mmol), potassium acetate (430 mg, 4.39 mmol) and Pd(dppf)Cl<sub>2</sub> (50 mg, 0.07 mmol) in deoxygenated 1,4- dioxane (30 mL) was stirred at 85°C under argon overnight. The solvent was evaporated under vacuum. The residue was poured into water (80 mL) and extracted with dichloromethane (3 × 40 mL). The combined organic layers were washed with brine (saturated), dried over Na<sub>2</sub>SO<sub>4</sub>, and concentrated under vacuum. The residue was purified by column chromatography on the silica gel (petroleum: ethyl acetate = 5:1 as the eluent) to afford **4** (616 mg, 0.99 mmol, 68% yield).

Molecule **4** <sup>1</sup>H NMR (400 MHz, Chloroform-d) δ 8.25 (d, J = 7.9 Hz, 2H), 7.87 – 7.76 (d, 3H), 7.76 – 7.69 (m, 3H), 7.69 – 7.61 (m, 2H), 7.57 (m, J = 7.7 Hz, 2H), 7.30-7.26 (m, 2H), 7.25 (m, J = 1.7 Hz, 2H), 2.01 (td, J = 7.2, 4.0 Hz, 4H), 1.41 (d, J = 12.0 Hz, 12H), 1.01 (tq, J = 8.7, 5.2, 3.5 Hz, 12H), 0.91 – 0.82 (m, 4H), 0.72 (t, J = 7.0 Hz, 6H). MALDI-MS: (m/z) =653.3

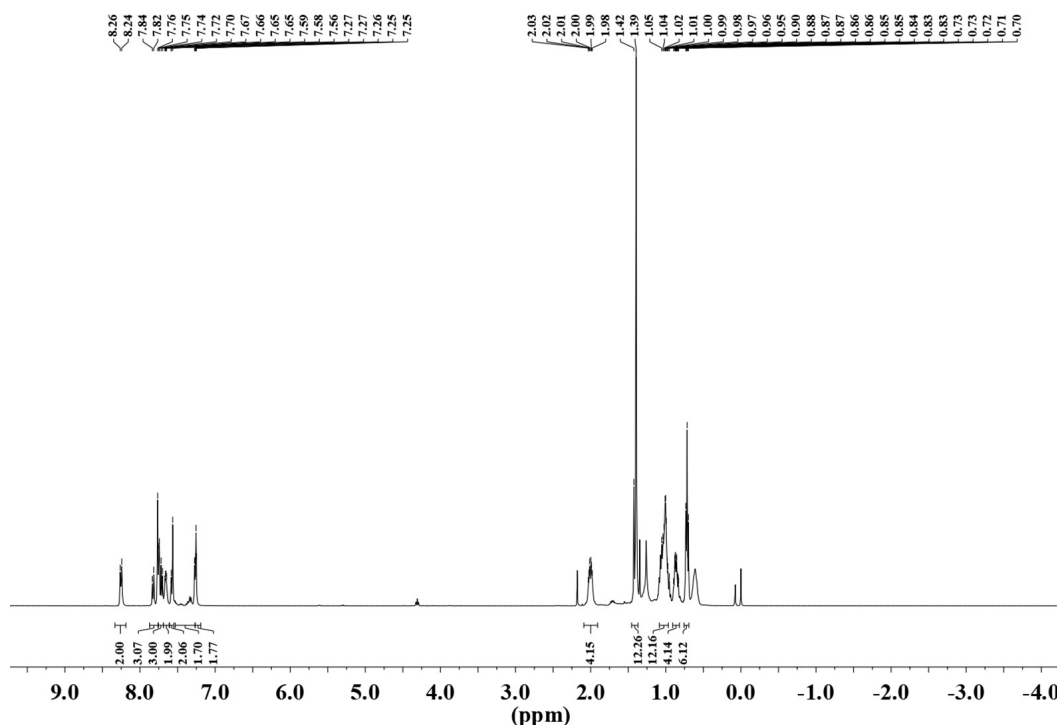

Figure S10. <sup>1</sup>H NMR spectrum of molecule **4**.

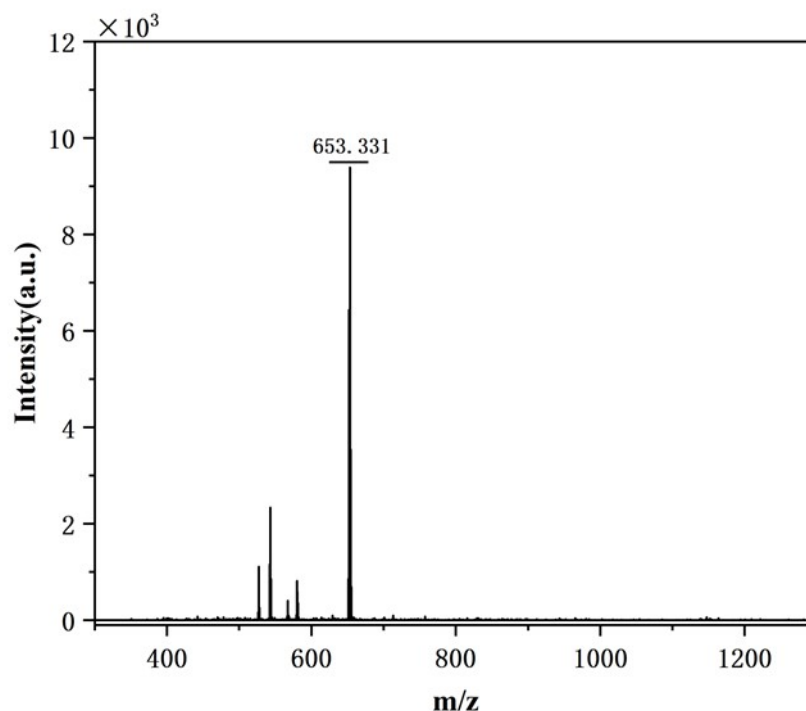

**Figure S11.** MALDI-TOF mass spectrum of molecule **4**.

**4-(7-(4-(1H-benzo[d]imidazol-2-yl)phenyl)-9,9-dihexyl-9H-fluoren-2-yl)benzo[c][1,2,5]thiadiazole (PC3).** To a stirred solution of **4** (200 mg, 0.31 mmol), 4-bromobenzo[c][1,2,5]thiadiazole (100 mg, 0.46 mmol), and tetrakis(triphenylphosphine)palladium (50 mg, 0.04 mmol) in deoxygenated 1,4-dioxane (40 mL), an aqueous solution of potassium carbonate (8 mL, 2.0 M) was added. Then the mixture was heated to 80 °C and stirred under argon overnight. The solvent was evaporated under vacuum. The residue was poured into water (40 mL) and extracted with dichloromethane (3 × 40 mL). The combined organic layer was washed with brine (saturated), dried over Na<sub>2</sub>SO<sub>4</sub>, and concentrated under vacuum. The residue was purified by column chromatography on silica gel (petroleum: dichloromethane = 1:1 as the eluent) to afford **PC3** (237 mg, 0.36 mmol, 78% yield).

**PC3** <sup>1</sup>H NMR (400 MHz, THF-*d*<sub>8</sub>) δ: 11.86 (s, 1H), 8.31 – 8.23 (m, 2H), 8.14 (d, *J* = 1.6 Hz, 1H), 8.09 – 7.97 (m, 2H), 7.93 (d, *J* = 3.1 Hz, 1H), 7.92 – 7.84 (m, 4H), 7.82 (d, *J* = 1.7 Hz, 1H), 7.79 – 7.71 (m, 2H), 7.71 – 7.61 (m, 1H), 7.50 – 7.38 (m, 1H), 7.23 – 7.08 (m, 2H), 2.28 – 2.06 (m, 4H), 1.11 (m, 12H), 0.83 (dt, *J* = 10.4, 5.8 Hz, 4H), 0.76 (t, *J* = 6.7 Hz, 6H). MALDI-MS: (*m/z*) = 661.3.

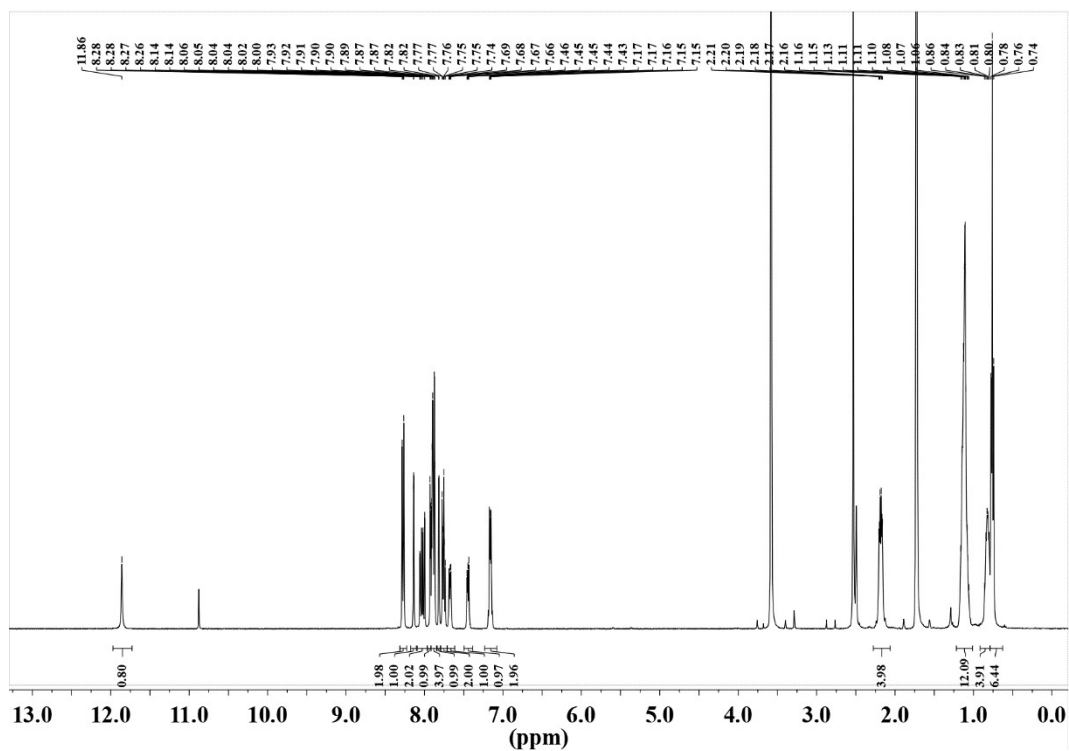

Figure S12.  $^1\text{H}$  NMR spectrum of PC3.

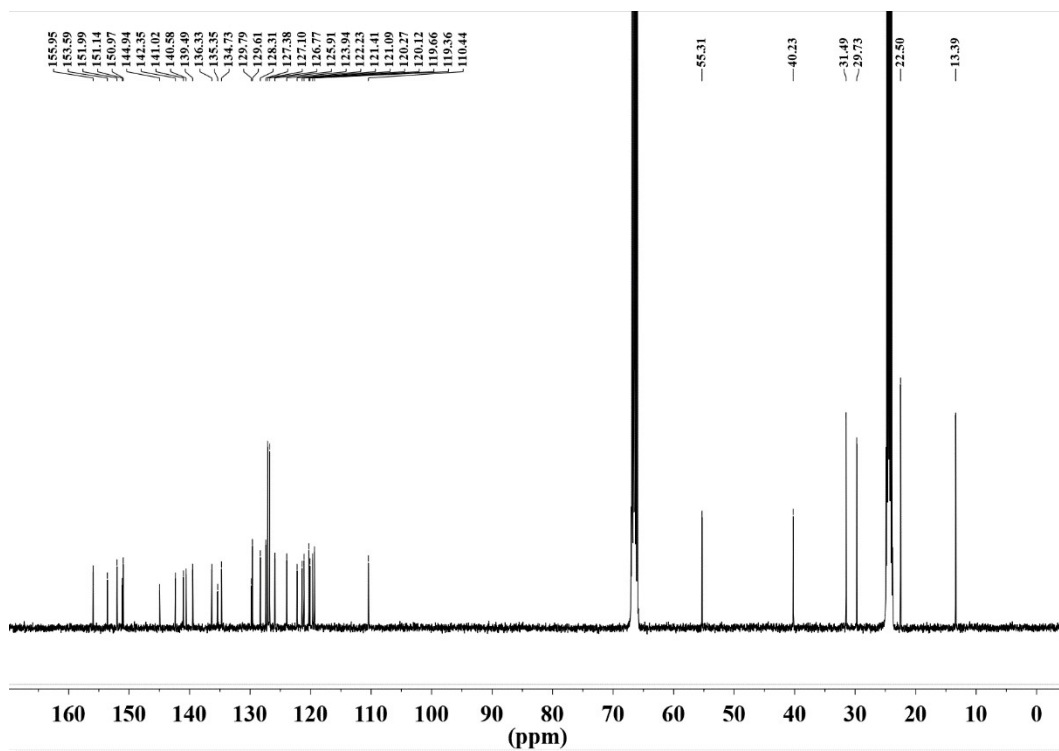

Figure S13  $^{13}\text{C}$  NMR spectrum of PC3.

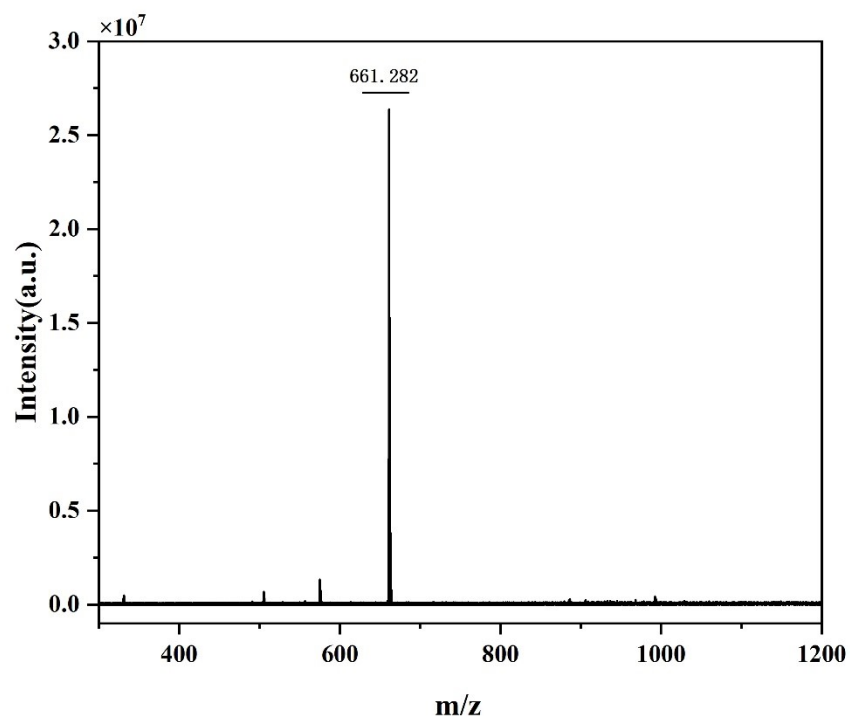

**Figure S14.** MALDI-TOF mass spectrum of **PC3**.

## 2. Experimental methods

General considerations All polymerizations were carried out under an argon atmosphere using glove box. **PC1**, **PC2**, and **PC3** were prepared and characterized according to the supporting information above. All other reagents were used as received. NMR spectra were performed in Bruker Avance III 400 HD spectrometer in deuterated solvents. Analysis of polymer molecular weights was performed via Gel permeation chromatography (GPC) coupled with 2414 RI detector, using Styragel HT 3, Styragel HT 4, Styragel HT 5 gel permeation columns. DMF was used as the eluent at a flow rate of 1.0 mL/min. Matrix-assisted laser desorption/ionization time-of-flight (MALDI-TOF) mass spectrometry analysis was performed on a Bruker Autoflex III Smartbeam MALDI-TOF mass spectrometer. Absorption spectra of photocatalysts were obtained on a Hitachi U-3900 spectrometer.

Computational details All calculations were carried out with the Gaussian 16 software<sup>2</sup>. The wB97xD functional<sup>3</sup> was adopted for all calculations in combination with the SMD solvation model with DMF as the solvent<sup>4</sup>. For geometry optimization and frequency calculations the def2-SVP basis set<sup>5</sup> was employed, and then single point calculations were performed with the def2-TZVP basis set.

General polymerization procedure A vial equipped with a magnetic stir bar and fitted with a Teflon screw cap septum was charged with methyl methacrylate (213  $\mu$ L, 50 equiv.), initiator (1 equiv.), triethylamine (20 equiv.), photocatalyst **PC1** (0.02 equiv.) in DMF (0.8 mL). The reaction mixture was degassed and backfilled with argon using glove box. The reaction was vigorously stirred in front of 470 nm blue LED light for 6 h. An aliquot was taken and analyzed using <sup>1</sup>H NMR in CDCl<sub>3</sub> to give the conversion, and the isolated polymer by methanol was used for GPC to give the  $M_n$  and  $D$ .

Control experiments The control experiments were the same as the general polymerization procedure, but the feeding ratio depended on the demand. An aliquot was taken and analyzed using <sup>1</sup>H NMR in CDCl<sub>3</sub> to give the conversion. If the conversion is lower than 1%, it will be considered as no polymerization.

The evaluated experiments A vial equipped with a magnetic stir bar and fitted with a Teflon screw cap septum was charged with different kinds and quantities of monomer, initiator, donor, photocatalyst **PC1**, **PC2**, and **PC3** in solvent. the reaction mixture was degassed and backfilled with argon using glove box. The reaction was vigorously stirred in front of 470 nm blue LEDs for 6 h. An aliquot was taken and analyzed using <sup>1</sup>H NMR in CDCl<sub>3</sub> to give the conversion, and the isolated polymer by methanol was used for GPC to give the  $M_n$  and  $D$ .

Reaction setups for O-ATRP The reactions were performed in a photoreactor, the vial with reaction mixture is placed at the center of a stir plate and surrounded by water to maintain ambient temperature. The parallel blue LED lamp (CEL-100HALED 470 nm) is placed perpendicular to the sidewall of the vial. The reaction temperature can be maintained at 20-25°C during the reaction.

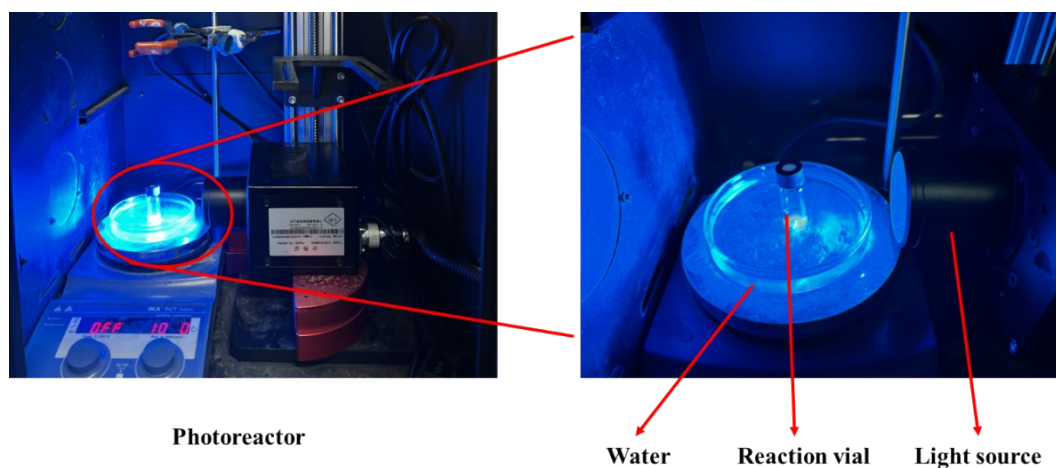

**Figure S15.** Reaction setup for polymerization.

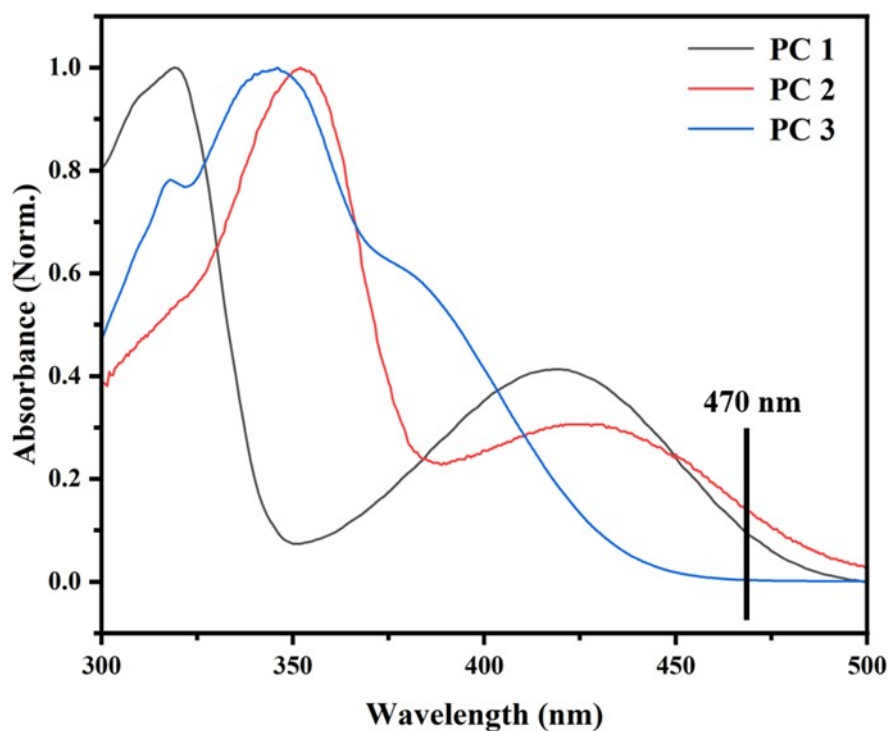

**Figure S16.** UV-Vis-NIR spectra of PC1, PC2, and PC3 in DMF at 295 K.

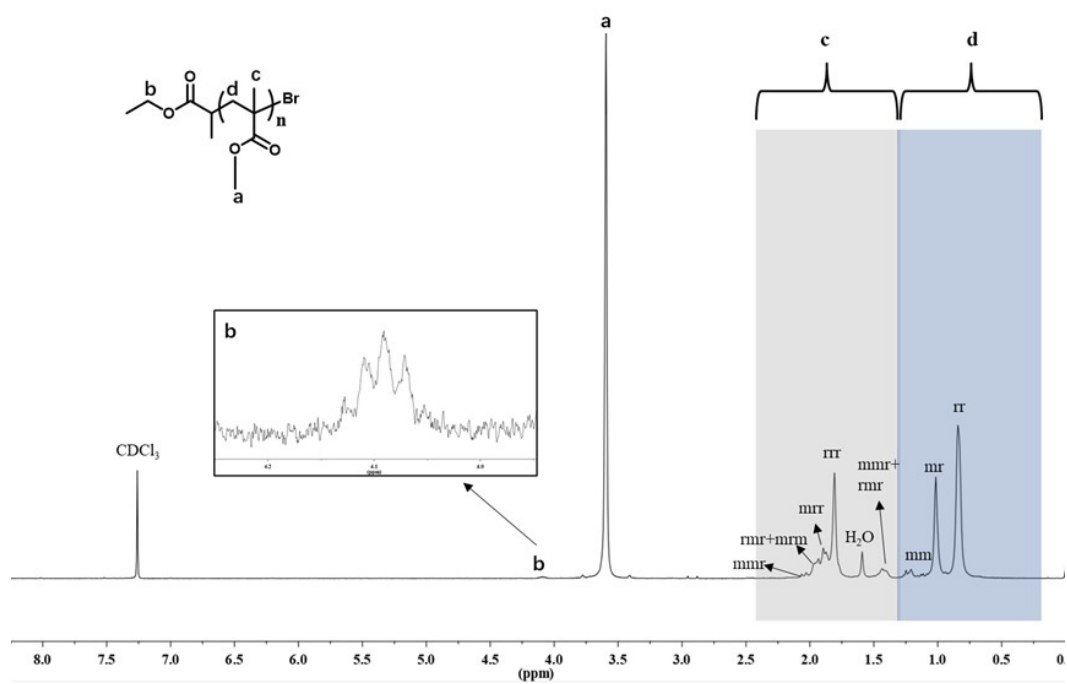

**Figure S17.**  $^1\text{H}$  NMR spectra of the obtained PMMA product. (mmr, rmr, mrm, etc. are tacticity of polymer.)



### 3. Other supporting figures and tables

**Table S1. Control experiments.**

| Entry <sup>a</sup> | [MMA]:[EBrP] | Photocatalyst | Donor  | Light  | Conversion (%) <sup>b</sup> |
|--------------------|--------------|---------------|--------|--------|-----------------------------|
| S1                 | 50:1         | 0.02 eq.      | -      | 470 nm | 3.2                         |
| S2                 | 50:1         | -             | 20 eq. | 470nm  | n/a                         |
| S3                 | 50:1         | 0.02 eq.      | 20 eq. | -      | n/a                         |
| S4                 | 50:0         | 0.02 eq.      | 20 eq. | 470 nm | n/a                         |
| S5 <sup>c</sup>    | 50:1         | 0.02 eq       | 20 eq. | 470 nm | n/a                         |

<sup>a</sup> 213  $\mu$ L (50 eq.) methyl methacrylate in 800  $\mu$ L DMF.

<sup>b</sup> Calculated by <sup>1</sup>H NMR in CDCl<sub>3</sub>, conversion lower than 1% considered as did not react.

<sup>c</sup> In oxygen atmosphere.

**Table S2. The results of evaluated experiments**

| Entry <sup>a</sup> | [MMA]:[EBrP]:[Et <sub>3</sub> N]:[PC1] | Solvent | Conversion (%) <sup>b</sup> | $M_n$ (kg.mol <sup>-1</sup> ) <sup>c</sup> | $\bar{D}$ ( $M_w/M_n$ ) <sup>c</sup> | $I^*$ <sup>d</sup> |
|--------------------|----------------------------------------|---------|-----------------------------|--------------------------------------------|--------------------------------------|--------------------|
| S6                 | 50:1:10:0.02                           | DMF     | 76.0                        | 13.1                                       | 1.31                                 | 29.0               |
| S7                 | 50:1:5:0.02                            | DMF     | 72.4                        | 15.1                                       | 1.39                                 | 24.0               |
| S8                 | 50:1:2:0.02                            | DMF     | 68.7                        | 15.8                                       | 1.58                                 | 21.7               |
| S9                 | 50:1:1:0.02                            | DMF     | 50.8                        | 22.5                                       | 1.63                                 | 11.3               |
| S10                | 50:1:0.5:0.02                          | DMF     | 42.7                        | 27.2                                       | 1.71                                 | 7.8                |
| S11                | 50:1:20:0.02                           | DMSO    | 84.5                        | 11.7                                       | 1.37                                 | 36.1               |
| S12                | 50:1:20:0.02                           | DMA     | 69.7                        | 10.9                                       | 1.34                                 | 32.0               |
| S13                | 50:1:20:0.02                           | TCM     | 28.4                        | 14.2                                       | 1.29                                 | 10.0               |
| S14                | 50:1:20:0.02                           | THF     | 41.6                        | 15.1                                       | 1.39                                 | 13.8               |
| S15                | 50:1:20:0.02                           | DMI     | 75.4                        | 13.3                                       | 1.33                                 | 28.3               |

<sup>a</sup> 213  $\mu$ L (50 eq.) methyl methacrylate in 800  $\mu$ L DMF.

<sup>b</sup> Calculated by <sup>1</sup>H NMR in CDCl<sub>3</sub>.

<sup>c</sup>  $M_n$  and  $M_w$  are measured by GPC in DMF.  $\bar{D} = M_w/M_n$ .

<sup>d</sup>  $I^* = \text{theoretical } M_n / \text{experimentally measured } M_n \times 100$ .  $M_n(\text{theo.})$  calculated based on [MMA]: [EBrP].

**Table S3. Results of the polymerization of different monomers using PC1 as the**

| Entry <sup>a</sup> | Monomer             | Conversion (%) <sup>b</sup> | $M_n$ (kg.mol <sup>-1</sup> ) <sup>c</sup> | $\bar{D}$ ( $M_w/M_n$ ) <sup>c</sup> |
|--------------------|---------------------|-----------------------------|--------------------------------------------|--------------------------------------|
| S16                | acrylonitrile       | 62.8                        | 5.87                                       | 1.21                                 |
| S17                | benzyl methacrylate | 83.2                        | 9.14                                       | 1.57                                 |
| S18                | butyl methacrylate  | 75.6                        | 5.99                                       | 1.32                                 |
| S19                | methyl acrylate     | 78.4                        | 9.80                                       | 1.32                                 |

**photocatalyst.**

<sup>a</sup> Entry S16 132  $\mu$ L (50 eq.) acrylonitrile in 800  $\mu$ L DMF; entry S17 339  $\mu$ L (50 eq.) benzyl methacrylate in 800  $\mu$ L DMF; entry S18 316  $\mu$ L (50 eq.) butyl methacrylate in 800  $\mu$ L DMF; entry S19 179  $\mu$ L (50 eq.) methyl acrylate in 800  $\mu$ L DMF. Entry S16-S19 [Monomer]:[EBrP]:[Et<sub>3</sub>N]:[PC1]=50:1:20:0.02.

<sup>b</sup> Calculated by <sup>1</sup>H NMR.

<sup>c</sup>  $M_n$  and  $M_w$  are measured by GPC in DMF.  $\bar{D} = M_w/M_n$ .

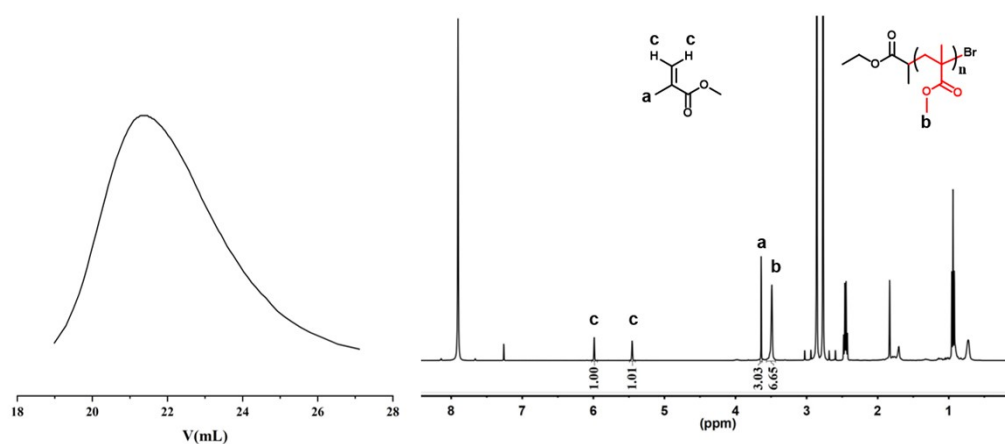

**Figure S18.** Typical GPC trace (DMF, PS standard, 45°C) and <sup>1</sup>H NMR (400 MHz, CDCl<sub>3</sub>, 298 K) spectra for calculating the conversion rate, table 1, entry 1. The conversion = the integration of peak H<sub>b</sub> / (the integration of peak H<sub>a</sub> + the integration of peak H<sub>b</sub>).

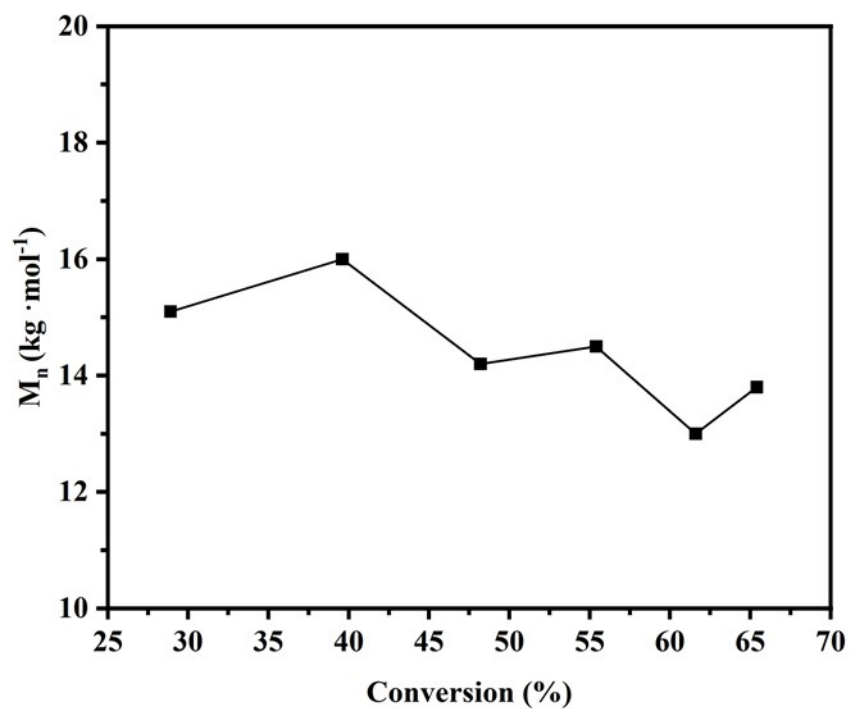

**Figure S19.** Plot of the  $M_n$  as a function of monomer conversion,  $[\text{MMA}]:[\text{EBrP}]:[\text{Et}_3\text{N}]:[\text{PC1}] = 50:1:20:0.02$ .

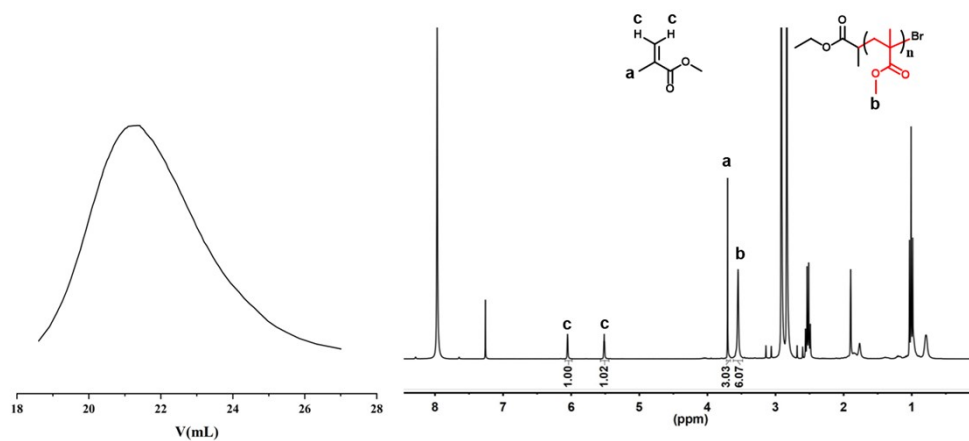

**Figure S20.** Typical GPC trace (DMF, PS standard, 45°C) and  $^1\text{H}$ NMR (400 MHz,  $\text{CDCl}_3$ , 298 K) spectra for calculating the conversion rate, table 1, entry 10. The conversion is calculated by integration of peak Hb / (the integration of peak Ha + the integration of peak Hb).

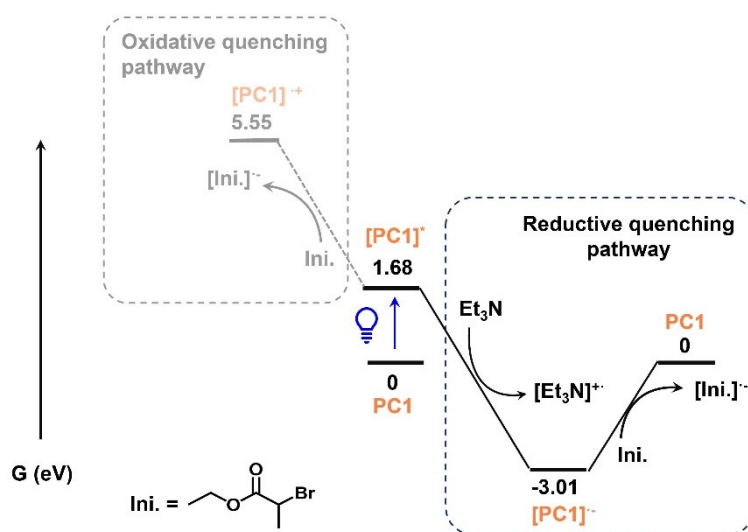

**Figure S21.** Calculated Gibbs free energy profile of the species involved in the photocatalytic O-ATRP process.

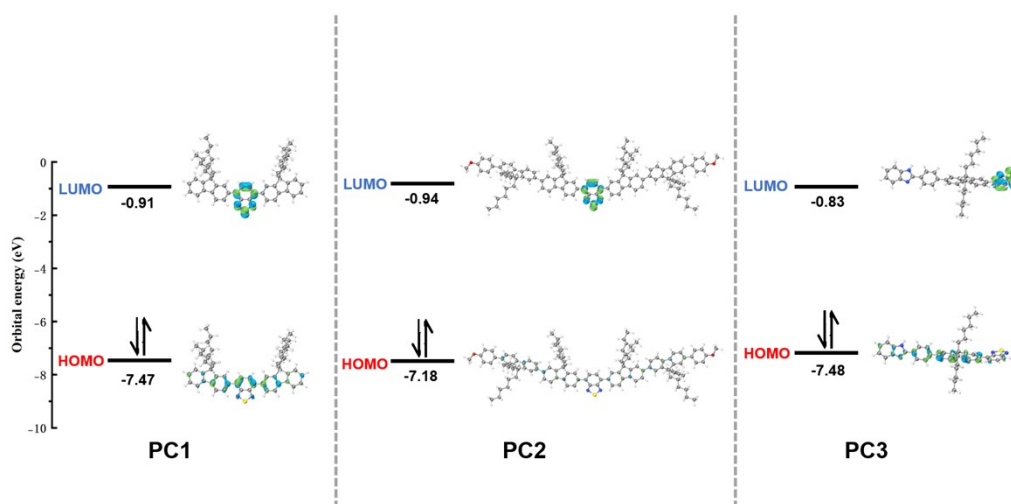

**Figure S22.** Orbital energy (in eV) and electron cloud distribution of PC1, PC2 and PC3 (HOMO = highest occupied molecular orbital, LUMO = lowest unoccupied molecular orbital).

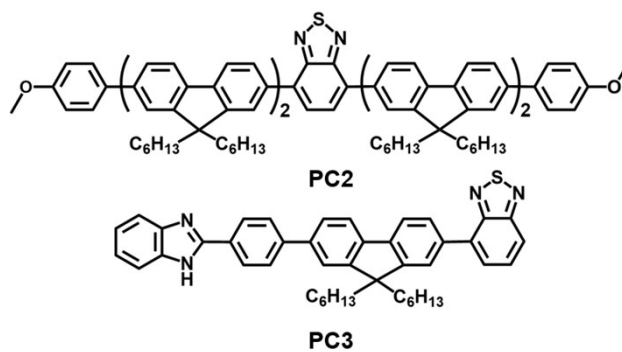

|                                    | Potential (V vs SCE) |
|------------------------------------|----------------------|
| PC2/PC2 <sup>-</sup>               | -1.69                |
| PC2 <sup>+</sup> /PC2 <sup>*</sup> | -0.93                |
| PC3/PC3 <sup>-</sup>               | -1.57                |
| PC3 <sup>+</sup> /PC3 <sup>*</sup> | -0.52                |

**Figure S23.** Calculated redox potentials of **PC2** and **PC3**.

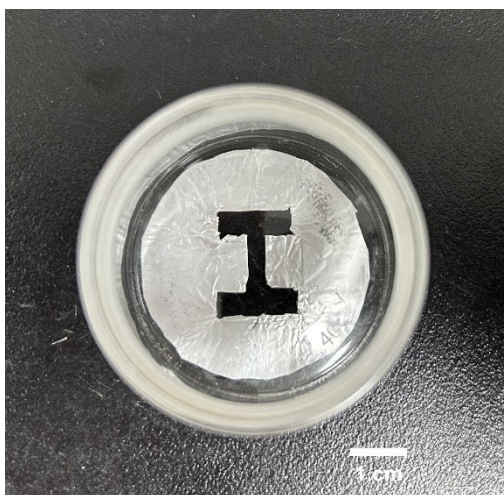

**Figure S24.** Home-made photomask with pattern “I” from the aluminum foil.

**Table S4. Comparison of photocatalytic ATRP performance of state-of-the-art metal-free photocatalysts.**

| Photocatalyst                                        | $M_n$ (kg·mol <sup>-1</sup> ) | $\mathcal{D}$    |
|------------------------------------------------------|-------------------------------|------------------|
| <b>This work</b>                                     | <b>13.6-25.1</b>              | <b>1.29-1.58</b> |
| Fluorescein <sup>2</sup>                             | 20.0-60.0                     | 1.30-1.60        |
| Eosin Y <sup>2</sup>                                 | 8.70-22.1                     | 1.30-1.90        |
| Erythrosine B <sup>2</sup>                           | 13.7-90.0                     | 1.20-2.50        |
| PTDI <sup>11</sup>                                   | 6.70-87.7                     | 1.22-1.75        |
| 1,1'-bisnaphthol <sup>13</sup>                       | 12.3-19.9                     | 1.19-1.34        |
| N-Aryl phenoxazine <sup>18</sup>                     | 4.60-112.5                    | 1.07-1.38        |
| Thioxanthone <sup>33</sup>                           | 8.90-17.0                     | 1.28-1.45        |
| N,N-diaryl dihydrophenazine <sup>36</sup>            | 9.52-25.5                     | 1.09-1.45        |
| Curcumin <sup>43</sup>                               | 60.5-76.3                     | 1.51-1.69        |
| oligopyrene <sup>44</sup>                            | 12.0-39.1                     | 1.32-1.66        |
| heteroatom-doping of polycyclic arenes <sup>45</sup> | 8.40-19.1                     | 1.25-1.57        |

$M_n$  represents number-average molecular weight.

$\mathcal{D}$  represents the dispersity of the polymer,  $\mathcal{D} = M_w/M_n$ .

## 4. Atom Coordinates

[PC1]

|   |             |             |             |
|---|-------------|-------------|-------------|
| C | 3.69171300  | -3.82647500 | -0.61181000 |
| C | 2.95188100  | -2.64992600 | -0.39332000 |
| C | 3.63601400  | -1.43941400 | -0.18501700 |
| C | 5.02382200  | -1.41711500 | -0.20763000 |
| C | 5.74672700  | -2.59658600 | -0.43181300 |
| C | 5.08435700  | -3.80685900 | -0.63375500 |
| H | 3.16838900  | -4.76851600 | -0.78039000 |
| H | 3.07332600  | -0.52179000 | 0.00500800  |
| H | 5.64175400  | -4.72910600 | -0.81395900 |
| C | 5.95078600  | -0.21801700 | -0.02564900 |
| C | 7.31783100  | -0.88699500 | -0.17958200 |
| C | 8.59712500  | -0.33711300 | -0.10410300 |
| C | 9.71307600  | -1.16685400 | -0.25503100 |
| C | 9.56218500  | -2.53721700 | -0.48175100 |
| C | 8.28801600  | -3.10013800 | -0.55929900 |
| C | 7.17759000  | -2.27024200 | -0.40627000 |
| H | 8.74429800  | 0.72956800  | 0.06688100  |
| H | 10.71465900 | -0.73428000 | -0.19407200 |
| H | 10.44540100 | -3.16996400 | -0.59750100 |
| H | 8.16145900  | -4.17135800 | -0.73405900 |
| C | 1.46907300  | -2.66032000 | -0.42235900 |
| C | 0.69431400  | -3.72273500 | 0.16375000  |
| C | 0.74479000  | -1.64905300 | -1.00649200 |
| C | -0.75434000 | -3.71273600 | 0.10312900  |
| C | -0.68123100 | -1.63727700 | -1.06223600 |
| H | 1.27458200  | -0.82107700 | -1.48273200 |
| C | -1.46367400 | -2.63849500 | -0.54013500 |
| H | -1.16093300 | -0.79999400 | -1.57416500 |
| N | 1.17349200  | -4.77468500 | 0.82556500  |
| N | -1.30249500 | -4.75783800 | 0.72043400  |
| S | -0.09380800 | -5.66309800 | 1.31452200  |
| C | 5.72420300  | 0.33736100  | 1.40571400  |
| C | 6.46328700  | 1.60429500  | 1.82544300  |
| H | 5.96776300  | -0.47063500 | 2.11767800  |
| H | 4.64197700  | 0.52290400  | 1.51593300  |

|   |             |             |             |
|---|-------------|-------------|-------------|
| C | 6.20934000  | 1.95749300  | 3.28913000  |
| H | 7.54801500  | 1.48849900  | 1.67133800  |
| H | 6.14488300  | 2.45132400  | 1.19583200  |
| C | 6.94181900  | 3.21613600  | 3.74466100  |
| H | 5.12401200  | 2.08582600  | 3.45224800  |
| H | 6.51423000  | 1.10832600  | 3.92702600  |
| H | 8.02644600  | 3.08398000  | 3.57866700  |
| H | 6.63914700  | 4.06658600  | 3.10690600  |
| C | 6.69830500  | 3.57271100  | 5.20884000  |
| C | 7.44989500  | 4.81982800  | 5.65868900  |
| H | 6.99164900  | 2.71732500  | 5.84267400  |
| H | 5.61562500  | 3.71463000  | 5.37260100  |
| H | 7.26069900  | 5.04520400  | 6.71977700  |
| H | 8.53788300  | 4.69504700  | 5.53291400  |
| H | 7.14815300  | 5.70228900  | 5.07084800  |
| C | 5.62782600  | 0.81920000  | -1.13749900 |
| C | 6.70683300  | 1.81963900  | -1.54928300 |
| H | 4.72504100  | 1.36796600  | -0.81594600 |
| H | 5.33231200  | 0.26446600  | -2.04386800 |
| C | 6.16195300  | 2.87986300  | -2.50262900 |
| H | 7.14644300  | 2.31633200  | -0.67118600 |
| H | 7.53442100  | 1.28456400  | -2.04355200 |
| C | 7.21808900  | 3.86760100  | -2.98910400 |
| H | 5.69792000  | 2.38326200  | -3.37408300 |
| H | 5.34767600  | 3.43459500  | -2.00203900 |
| H | 7.68108700  | 4.36483900  | -2.11733400 |
| H | 8.03334700  | 3.31421600  | -3.48982600 |
| C | 6.67115100  | 4.92760000  | -3.94172300 |
| C | 7.72910700  | 5.91383800  | -4.42135700 |
| H | 5.85422300  | 5.47664700  | -3.44092100 |
| H | 6.21069800  | 4.42827300  | -4.81235400 |
| H | 7.30460800  | 6.66181700  | -5.10905400 |
| H | 8.18068800  | 6.45664500  | -3.57482500 |
| H | 8.54433400  | 5.39666500  | -4.95367400 |
| C | -2.94399100 | -2.60546200 | -0.62303800 |
| C | -3.67928700 | -3.76073400 | -0.94464400 |
| C | -3.62566400 | -1.39390700 | -0.41445000 |
| C | -5.06619900 | -3.71892900 | -1.06646100 |



|   |              |             |             |
|---|--------------|-------------|-------------|
| H | -3.15641300  | -4.70264600 | -1.11634900 |
| C | -5.00836600  | -1.35007200 | -0.53338500 |
| H | -3.06557200  | -0.49480300 | -0.14395900 |
| C | -5.72675200  | -2.50869800 | -0.85834000 |
| H | -5.62110500  | -4.62378500 | -1.32559600 |
| C | -5.93540100  | -0.15307500 | -0.33633200 |
| C | -7.15260500  | -2.16515600 | -0.91335300 |
| C | -7.29583400  | -0.79683300 | -0.61082800 |
| C | -5.55624400  | 0.91066600  | -1.40137200 |
| C | -5.76494100  | 0.36872000  | 1.11921000  |
| C | -8.25479100  | -2.96499300 | -1.21449300 |
| C | -8.56958900  | -0.22931400 | -0.62228100 |
| C | -6.27098100  | 2.25743300  | -1.37478100 |
| H | -5.69091300  | 0.45099200  | -2.39625300 |
| H | -4.47391000  | 1.09915600  | -1.29666800 |
| C | -6.92467000  | 1.12689700  | 1.76365800  |
| H | -4.86102500  | 1.00295500  | 1.13217800  |
| H | -5.53338000  | -0.49302700 | 1.76723700  |
| C | -9.52361900  | -2.38519100 | -1.21921500 |
| H | -8.12538800  | -4.02548100 | -1.44420400 |
| C | -9.67694600  | -1.02738500 | -0.92752000 |
| H | -8.71977100  | 0.82614200  | -0.39440500 |
| C | -5.80206500  | 3.17988100  | -2.49789200 |
| H | -7.36081500  | 2.11799000  | -1.45839300 |
| H | -6.09084200  | 2.75967400  | -0.41041700 |
| C | -6.52691600  | 1.77061000  | 3.08934600  |
| H | -7.31134000  | 1.90740400  | 1.09084600  |
| H | -7.76274900  | 0.43270700  | 1.94020900  |
| H | -10.40033300 | -2.99360500 | -1.45428800 |
| H | -10.67386600 | -0.58019100 | -0.93605400 |
| C | -6.50845700  | 4.53218600  | -2.50378900 |
| H | -4.71201900  | 3.33696300  | -2.40737700 |
| H | -5.95775800  | 2.68192500  | -3.47186400 |
| C | -7.68528100  | 2.47445800  | 3.79008000  |
| H | -6.10621900  | 1.00058000  | 3.76119700  |
| H | -5.71307800  | 2.49685900  | 2.91178900  |
| H | -7.59587800  | 4.37383600  | -2.62116400 |
| H | -6.37733000  | 5.01599300  | -1.51870300 |

|   |             |            |             |
|---|-------------|------------|-------------|
| C | -6.01773500 | 5.47942900 | -3.59585800 |
| H | -8.11633100 | 3.22979100 | 3.10786500  |
| H | -8.49212400 | 1.74398600 | 3.98188800  |
| C | -7.29400500 | 3.14859400 | 5.10254500  |
| C | -6.74189200 | 6.82022600 | -3.59867100 |
| H | -6.13842100 | 4.99231600 | -4.57948800 |
| H | -4.93344100 | 5.64530100 | -3.46966600 |
| C | -8.46032400 | 3.84405500 | 5.79441500  |
| H | -6.49099800 | 3.88113500 | 4.90789900  |
| H | -6.85917800 | 2.39456000 | 5.78207700  |
| H | -6.36276200 | 7.48521400 | -4.39022500 |
| H | -7.82369900 | 6.68795400 | -3.76372700 |
| H | -6.61580000 | 7.34218100 | -2.63594200 |
| H | -8.14577100 | 4.32439100 | 6.73396400  |
| H | -8.89714500 | 4.62474000 | 5.15030100  |
| H | -9.26272500 | 3.12852400 | 6.03778300  |

[PC1]\*

|   |            |             |             |
|---|------------|-------------|-------------|
| C | 2.32581400 | -2.70105100 | -2.06707000 |
| C | 2.04569700 | -1.93174700 | -0.92329800 |
| C | 3.01761500 | -1.03768500 | -0.44195000 |
| C | 4.23361300 | -0.91949000 | -1.10101900 |
| C | 4.49443100 | -1.68387400 | -2.24633700 |
| C | 3.54278600 | -2.57923100 | -2.73394200 |
| H | 1.57313600 | -3.39380200 | -2.44679200 |
| H | 2.81648000 | -0.45185600 | 0.45888500  |
| H | 3.74062500 | -3.17472400 | -3.62835100 |
| C | 5.41511800 | -0.02043500 | -0.74600600 |
| C | 6.38871000 | -0.36996800 | -1.87291600 |
| C | 7.67491000 | 0.10661000  | -2.12468000 |
| C | 8.39074900 | -0.38769200 | -3.21971000 |
| C | 7.83417500 | -1.35161500 | -4.06413300 |
| C | 6.54951100 | -1.83921000 | -3.82220700 |
| C | 5.83906200 | -1.34501000 | -2.72846700 |
| H | 8.13166700 | 0.86266600  | -1.48554300 |
| H | 9.39776300 | -0.01148300 | -3.41569300 |
| H | 8.40688400 | -1.72530200 | -4.91629500 |
| H | 6.10873300 | -2.59479100 | -4.47724500 |
| C | 0.73467200 | -2.02397600 | -0.23636300 |

|   |             |             |             |
|---|-------------|-------------|-------------|
| C | 0.09790200  | -3.28510700 | 0.03629800  |
| C | 0.06185200  | -0.90854600 | 0.20133900  |
| C | -1.17229000 | -3.34390800 | 0.73169600  |
| C | -1.19101500 | -0.96616000 | 0.88201200  |
| H | 0.49455000  | 0.07775600  | 0.01838700  |
| C | -1.84040700 | -2.14454000 | 1.16591100  |
| H | -1.63977800 | -0.02336700 | 1.20176900  |
| N | 0.56670700  | -4.49057500 | -0.28182900 |
| N | -1.61307200 | -4.58954000 | 0.89533900  |
| S | -0.51086800 | -5.58654300 | 0.24195900  |
| C | -3.13712900 | -2.19052700 | 1.87179300  |
| C | -4.19863300 | -1.34649200 | 1.51447200  |
| C | -3.33852000 | -3.08443100 | 2.96722700  |
| C | -5.43983600 | -1.37736900 | 2.25987600  |
| C | -4.34523500 | -0.40366400 | 0.46409200  |
| C | -4.52308000 | -3.10552100 | 3.67484600  |
| H | -2.52573800 | -3.75119300 | 3.26046100  |
| C | -5.59754700 | -2.24631700 | 3.33136100  |
| C | -6.33526800 | -0.43515500 | 1.67994100  |
| C | -5.71151900 | 0.24800200  | 0.48259300  |
| H | -3.60397900 | -0.18798900 | -0.30741200 |
| H | -4.63356200 | -3.79404300 | 4.51599400  |
| H | -6.53323000 | -2.27452300 | 3.89448700  |
| H | -7.33844500 | -0.22754700 | 2.05477000  |
| C | 5.93951800  | -0.47628500 | 0.64201300  |
| C | 7.09113900  | 0.29524800  | 1.27838400  |
| H | 6.22590300  | -1.53909300 | 0.55512300  |
| H | 5.08387500  | -0.44816100 | 1.33851700  |
| C | 7.53777500  | -0.32596100 | 2.59997000  |
| H | 7.95441700  | 0.33218500  | 0.59461100  |
| H | 6.79010900  | 1.33973500  | 1.46096300  |
| C | 8.70810700  | 0.40549800  | 3.25016800  |
| H | 6.68432700  | -0.34783200 | 3.30157300  |
| H | 7.81718400  | -1.38130200 | 2.42969200  |
| H | 9.56110600  | 0.42008400  | 2.54752000  |
| H | 8.43407600  | 1.46343600  | 3.41481200  |
| C | 9.15747600  | -0.20936500 | 4.57322000  |
| C | 10.34244800 | 0.51105400  | 5.20461700  |

|   |             |             |             |
|---|-------------|-------------|-------------|
| H | 9.41530000  | -1.27039700 | 4.40885800  |
| H | 8.30816200  | -0.21038500 | 5.27891100  |
| H | 10.63834500 | 0.04450100  | 6.15705300  |
| H | 11.22022800 | 0.49405700  | 4.53785800  |
| H | 10.10485100 | 1.56777500  | 5.40991400  |
| C | 4.93075400  | 1.45670800  | -0.75612900 |
| C | 5.95289700  | 2.56432200  | -1.00652500 |
| H | 4.42231600  | 1.63807800  | 0.20721000  |
| H | 4.14990300  | 1.55286800  | -1.52895700 |
| C | 5.34979700  | 3.95249600  | -0.80615300 |
| H | 6.83048500  | 2.45562600  | -0.35101900 |
| H | 6.33063000  | 2.48529200  | -2.03914800 |
| C | 6.29009700  | 5.08664500  | -1.20281900 |
| H | 4.41646100  | 4.03325300  | -1.39242400 |
| H | 5.05419300  | 4.07309700  | 0.25172700  |
| H | 7.23669700  | 4.99272000  | -0.64011600 |
| H | 6.55973800  | 4.97513200  | -2.26877000 |
| C | 5.70446400  | 6.47802800  | -0.97643900 |
| C | 6.63183200  | 7.60291200  | -1.42032600 |
| H | 5.46293600  | 6.59986500  | 0.09408900  |
| H | 4.74392500  | 6.55825700  | -1.51518200 |
| H | 6.18232200  | 8.59214300  | -1.24184100 |
| H | 7.59043300  | 7.56826100  | -0.87716900 |
| H | 6.85878000  | 7.52920100  | -2.49653800 |
| C | -5.53769300 | 1.77560900  | 0.70199100  |
| C | -6.80746900 | 2.62143700  | 0.70599600  |
| H | -4.86196100 | 2.14991300  | -0.08781100 |
| H | -5.00454700 | 1.92075700  | 1.65782400  |
| C | -6.53264000 | 4.09154100  | 1.01257400  |
| H | -7.30385400 | 2.55206300  | -0.27616000 |
| H | -7.52418800 | 2.22368100  | 1.44572600  |
| C | -7.78688600 | 4.96030000  | 0.99211600  |
| H | -6.04477700 | 4.17619800  | 2.00031400  |
| H | -5.80457300 | 4.48456800  | 0.27989200  |
| H | -8.27995000 | 4.86334100  | 0.00772500  |
| H | -8.51087200 | 4.57331700  | 1.73223600  |
| C | -7.51819700 | 6.43612300  | 1.27544900  |
| C | -8.77808400 | 7.29315500  | 1.25213600  |

|   |              |             |             |
|---|--------------|-------------|-------------|
| H | -6.79606400  | 6.82066300  | 0.53373900  |
| H | -7.02385100  | 6.53291300  | 2.25809100  |
| H | -8.55292300  | 8.35201200  | 1.45364600  |
| H | -9.27750300  | 7.23934200  | 0.27089900  |
| H | -9.50363000  | 6.95612100  | 2.01048500  |
| C | -6.45991700  | -0.06155000 | -0.85063600 |
| C | -7.97903200  | -0.20449400 | -0.76219000 |
| H | -6.05863800  | -1.00478100 | -1.25934500 |
| H | -6.19994100  | 0.72141500  | -1.58434300 |
| C | -8.62944100  | -0.38076700 | -2.13138400 |
| H | -8.22674200  | -1.07582300 | -0.13143400 |
| H | -8.42440700  | 0.66873100  | -0.25960900 |
| C | -10.14468500 | -0.54914100 | -2.06923000 |
| H | -8.38546300  | 0.49115400  | -2.76511800 |
| H | -8.18387700  | -1.25693600 | -2.63630600 |
| H | -10.39045600 | -1.41375900 | -1.42607000 |
| H | -10.58866400 | 0.33306700  | -1.57314200 |
| C | -10.79806600 | -0.73841300 | -3.43594900 |
| C | -12.31218400 | -0.89467600 | -3.36417500 |
| H | -10.35811600 | -1.62415700 | -3.92697600 |
| H | -10.54544300 | 0.12225500  | -4.08011700 |
| H | -12.75399400 | -1.03025200 | -4.36371300 |
| H | -12.59458500 | -1.76842900 | -2.75403700 |
| H | -12.78323000 | -0.00796100 | -2.90920800 |

[PC1]-

|   |            |             |             |
|---|------------|-------------|-------------|
| C | 2.70708800 | -3.40499200 | -1.56820600 |
| C | 2.17981100 | -2.43954500 | -0.68252800 |
| C | 2.99892400 | -1.33961500 | -0.34516200 |
| C | 4.27229600 | -1.21635600 | -0.88095200 |
| C | 4.77156100 | -2.18442800 | -1.76322900 |
| C | 3.98602000 | -3.28375800 | -2.10835200 |
| H | 2.09447700 | -4.26689100 | -1.83091300 |
| H | 2.63664000 | -0.58832300 | 0.36077200  |
| H | 4.36150800 | -4.04549300 | -2.79682500 |
| C | 5.29022500 | -0.10302300 | -0.63910300 |
| C | 6.45356300 | -0.58347400 | -1.50851700 |
| C | 7.71187000 | -0.01818500 | -1.70915800 |
| C | 8.63073800 | -0.65832900 | -2.54801400 |

|   |             |             |             |
|---|-------------|-------------|-------------|
| C | 8.30092700  | -1.85611300 | -3.18638800 |
| C | 7.04585800  | -2.43506400 | -2.99100300 |
| C | 6.13225600  | -1.79599900 | -2.15234800 |
| H | 7.99188800  | 0.91881600  | -1.22667000 |
| H | 9.61603500  | -0.21250600 | -2.70485500 |
| H | 9.02878100  | -2.34304600 | -3.84008700 |
| H | 6.78494500  | -3.37468300 | -3.48449400 |
| C | 0.81230100  | -2.54266600 | -0.12541700 |
| C | 0.16813600  | -3.79063400 | 0.13143300  |
| C | 0.08815700  | -1.38030900 | 0.21212800  |
| C | -1.16323700 | -3.82969500 | 0.74801600  |
| C | -1.18807200 | -1.41566900 | 0.76349800  |
| H | 0.53561100  | -0.40267100 | 0.01899300  |
| C | -1.86196300 | -2.62009100 | 1.05300400  |
| H | -1.67152000 | -0.46831500 | 1.00720900  |
| N | 0.67201700  | -5.00898000 | -0.11237400 |
| N | -1.61473900 | -5.07227000 | 0.95622800  |
| S | -0.45046700 | -6.12597700 | 0.40333800  |
| C | -3.20069100 | -2.61613900 | 1.67084500  |
| C | -4.20724400 | -1.61402800 | 1.29593300  |
| C | -3.57340400 | -3.52621000 | 2.62695100  |
| C | -5.51317400 | -1.58109000 | 1.99854500  |
| C | -4.22772900 | -0.65547100 | 0.33431000  |
| C | -4.85324000 | -3.49221600 | 3.30192400  |
| H | -2.86660200 | -4.30264900 | 2.92079900  |
| C | -5.79452600 | -2.55234500 | 3.03109000  |
| C | -6.27938300 | -0.58959500 | 1.47444100  |
| C | -5.53252400 | 0.10037200  | 0.36295500  |
| H | -3.44155700 | -0.42164500 | -0.38390300 |
| H | -5.04285600 | -4.24910500 | 4.06820500  |
| H | -6.75168400 | -2.53029400 | 3.55787500  |
| H | -7.28915300 | -0.32804800 | 1.79344500  |
| C | 5.64003200  | -0.10697500 | 0.87265300  |
| C | 6.55933900  | 0.98134400  | 1.41847200  |
| H | 6.07296500  | -1.09455000 | 1.11019800  |
| H | 4.68685500  | -0.05232500 | 1.42583300  |
| C | 6.86082200  | 0.78578200  | 2.90262500  |
| H | 7.50987800  | 1.00325500  | 0.86140900  |

|   |             |             |             |
|---|-------------|-------------|-------------|
| H | 6.09133800  | 1.96985200  | 1.28087200  |
| C | 7.76211100  | 1.86925500  | 3.48727300  |
| H | 5.91086400  | 0.75656500  | 3.46636400  |
| H | 7.33315400  | -0.20186900 | 3.05230900  |
| H | 8.71414800  | 1.89352800  | 2.92639000  |
| H | 7.29279800  | 2.85761100  | 3.33051400  |
| C | 8.05900800  | 1.68484600  | 4.97334600  |
| C | 8.96363200  | 2.76858200  | 5.54743600  |
| H | 8.52401300  | 0.69547000  | 5.12925800  |
| H | 7.10684500  | 1.66411800  | 5.53206100  |
| H | 9.15601700  | 2.60881600  | 6.61976900  |
| H | 9.93817900  | 2.78897700  | 5.03273700  |
| H | 8.50957200  | 3.76683500  | 5.43490500  |
| C | 4.66593700  | 1.23943100  | -1.11385800 |
| C | 5.59841000  | 2.38490000  | -1.50496200 |
| H | 3.98284800  | 1.57967900  | -0.31556600 |
| H | 4.02299400  | 1.02554900  | -1.98415900 |
| C | 4.84172300  | 3.68846000  | -1.74644300 |
| H | 6.36459400  | 2.55530500  | -0.73335700 |
| H | 6.14518900  | 2.11495800  | -2.42340700 |
| C | 5.74342800  | 4.83779000  | -2.18652200 |
| H | 4.05923800  | 3.52320500  | -2.50927700 |
| H | 4.30856800  | 3.97661700  | -0.82236200 |
| H | 6.52983000  | 4.99333700  | -1.42541700 |
| H | 6.27244000  | 4.55202900  | -3.11385300 |
| C | 5.00096000  | 6.15160000  | -2.41632000 |
| C | 5.91410800  | 7.29253900  | -2.84809600 |
| H | 4.47058000  | 6.43374200  | -1.48981500 |
| H | 4.21759700  | 5.99660900  | -3.17910700 |
| H | 5.35207500  | 8.22687600  | -3.00163000 |
| H | 6.68904800  | 7.49101000  | -2.08955600 |
| H | 6.42985100  | 7.05522300  | -3.79303300 |
| C | -5.19341300 | 1.57496400  | 0.72181300  |
| C | -6.35122800 | 2.56339900  | 0.82809300  |
| H | -4.48038900 | 1.94850600  | -0.03356100 |
| H | -4.64771700 | 1.56390500  | 1.68182200  |
| C | -5.88751300 | 3.93346900  | 1.31783200  |
| H | -6.83727200 | 2.68439900  | -0.15404300 |

|   |              |             |             |
|---|--------------|-------------|-------------|
| H | -7.12197000  | 2.17254400  | 1.51467800  |
| C | -7.01097200  | 4.95952500  | 1.43150200  |
| H | -5.39658300  | 3.82087300  | 2.30134300  |
| H | -5.11022100  | 4.31852500  | 0.63318000  |
| H | -7.50700900  | 5.07037100  | 0.45007600  |
| H | -7.78508900  | 4.57787500  | 2.12184000  |
| C | -6.53815400  | 6.32906200  | 1.91333400  |
| C | -7.66280400  | 7.34973200  | 2.03813400  |
| H | -5.76932700  | 6.71016700  | 1.21834100  |
| H | -6.03474800  | 6.21385000  | 2.88933200  |
| H | -7.28712600  | 8.32411900  | 2.38761300  |
| H | -8.16294500  | 7.51254600  | 1.06934200  |
| H | -8.42988900  | 7.01186500  | 2.75403800  |
| C | -6.25006500  | -0.03149900 | -1.01203400 |
| C | -7.77348800  | 0.10889600  | -1.00939600 |
| H | -6.00406900  | -1.01715700 | -1.44096000 |
| H | -5.80731600  | 0.71397400  | -1.69587000 |
| C | -8.35105600  | 0.24132300  | -2.41568300 |
| H | -8.21683400  | -0.77361400 | -0.51797200 |
| H | -8.08746900  | 0.97774600  | -0.41064600 |
| C | -9.87449300  | 0.32170900  | -2.44157300 |
| H | -7.93024200  | 1.14309800  | -2.89627700 |
| H | -8.01826500  | -0.61392300 | -3.03161000 |
| H | -10.29581400 | -0.58560900 | -1.97191500 |
| H | -10.20397600 | 1.16865200  | -1.81227700 |
| C | -10.45994800 | 0.48047900  | -3.84247100 |
| C | -11.98142700 | 0.56512200  | -3.85427700 |
| H | -10.13223700 | -0.36681000 | -4.47028100 |
| H | -10.03629400 | 1.38631500  | -4.31072100 |
| H | -12.37367200 | 0.68007100  | -4.87679100 |
| H | -12.43474900 | -0.34258400 | -3.42335200 |
| H | -12.33721800 | 1.42469000  | -3.26279100 |

[PC1]<sup>+</sup>

|   |            |             |             |
|---|------------|-------------|-------------|
| C | 3.67908400 | -3.77403200 | -0.87685400 |
| C | 2.92748400 | -2.62915500 | -0.52298100 |
| C | 3.60034000 | -1.40547700 | -0.29731900 |
| C | 4.97544900 | -1.34747500 | -0.41493700 |
| C | 5.70477300 | -2.49102100 | -0.78450600 |



|   |             |             |             |
|---|-------------|-------------|-------------|
| C | 5.05826600  | -3.70660700 | -1.01981400 |
| H | 3.16886500  | -4.71650600 | -1.07210600 |
| H | 3.04168600  | -0.51717600 | 0.00538000  |
| H | 5.62241600  | -4.59355300 | -1.31565000 |
| C | 5.89137300  | -0.14876500 | -0.18960200 |
| C | 7.25020800  | -0.76420500 | -0.52245100 |
| C | 8.51962600  | -0.18717000 | -0.51508100 |
| C | 9.63170500  | -0.97222800 | -0.83392900 |
| C | 9.49090200  | -2.32506800 | -1.15863600 |
| C | 8.22862400  | -2.91520600 | -1.16900700 |
| C | 7.12040400  | -2.12846800 | -0.85097800 |
| H | 8.66044300  | 0.86580300  | -0.27052100 |
| H | 10.62561700 | -0.51853000 | -0.82906200 |
| H | 10.37374400 | -2.91952400 | -1.40515000 |
| H | 8.10667700  | -3.97175100 | -1.41896600 |
| C | 1.47412400  | -2.67726500 | -0.41495900 |
| C | 0.75323200  | -3.85032200 | 0.02668200  |
| C | 0.67767500  | -1.56710300 | -0.72201900 |
| C | -0.69151400 | -3.86959400 | 0.09574800  |
| C | -0.71292800 | -1.58042800 | -0.65672800 |
| H | 1.15567800  | -0.65557600 | -1.08238600 |
| C | -1.47503200 | -2.70716800 | -0.28161600 |
| H | -1.22928300 | -0.67516500 | -0.97545400 |
| N | 1.30428800  | -4.97379700 | 0.46694100  |
| N | -1.16070600 | -5.00711200 | 0.58857300  |
| S | 0.10595400  | -5.96816400 | 0.92030600  |
| C | 5.77638900  | 0.23418600  | 1.31138100  |
| C | 6.55752500  | 1.44056200  | 1.82080900  |
| H | 6.06322700  | -0.65291700 | 1.90289100  |
| H | 4.70660100  | 0.40700100  | 1.51927300  |
| C | 6.38549700  | 1.63720800  | 3.32548900  |
| H | 7.63024600  | 1.32881000  | 1.59490800  |
| H | 6.21898700  | 2.35369700  | 1.30555400  |
| C | 7.16689700  | 2.82669900  | 3.87514900  |
| H | 5.31227200  | 1.76702900  | 3.55437900  |
| H | 6.70023300  | 0.71882600  | 3.85297200  |
| H | 8.24253700  | 2.68221800  | 3.66666800  |
| H | 6.87252100  | 3.74159700  | 3.32940300  |

|   |             |             |             |
|---|-------------|-------------|-------------|
| C | 6.97090100  | 3.05059300  | 5.37250100  |
| C | 7.77411300  | 4.22567700  | 5.91661000  |
| H | 7.24873100  | 2.13012900  | 5.91555400  |
| H | 5.89753500  | 3.21082600  | 5.57602600  |
| H | 7.60579200  | 4.36697100  | 6.99553900  |
| H | 8.85515200  | 4.07323300  | 5.76446300  |
| H | 7.49875100  | 5.16542600  | 5.41041400  |
| C | 5.45222400  | 0.99571600  | -1.14364700 |
| C | 6.46789100  | 2.07257300  | -1.52331600 |
| H | 4.56964000  | 1.47428100  | -0.68427200 |
| H | 5.09089300  | 0.53896400  | -2.08012000 |
| C | 5.80843300  | 3.23173900  | -2.26652600 |
| H | 6.98461000  | 2.46566500  | -0.63474000 |
| H | 7.24963000  | 1.63277700  | -2.16425600 |
| C | 6.79181900  | 4.30461800  | -2.72395500 |
| H | 5.26155700  | 2.83974300  | -3.14314400 |
| H | 5.04508200  | 3.69228700  | -1.61359900 |
| H | 7.34852700  | 4.68557700  | -1.84852300 |
| H | 7.54731800  | 3.84950700  | -3.38978800 |
| C | 6.12565800  | 5.47488100  | -3.44354500 |
| C | 7.11030600  | 6.54533700  | -3.89780200 |
| H | 5.37129400  | 5.92640400  | -2.77544600 |
| H | 5.56804200  | 5.09202000  | -4.31632500 |
| H | 6.59866500  | 7.37494600  | -4.41037000 |
| H | 7.65861600  | 6.97116400  | -3.04158700 |
| H | 7.85640400  | 6.13180900  | -4.59609000 |
| C | -2.91198000 | -2.67168300 | -0.28537100 |
| C | -3.68992700 | -3.86996600 | -0.36778600 |
| C | -3.59478200 | -1.41824500 | -0.22308500 |
| C | -5.06630700 | -3.83115000 | -0.38263900 |
| H | -3.18413100 | -4.82966400 | -0.44862700 |
| C | -4.96476200 | -1.38426500 | -0.21658900 |
| H | -3.03484000 | -0.48662200 | -0.13356400 |
| C | -5.71156100 | -2.58538900 | -0.29528000 |
| H | -5.64312700 | -4.75374300 | -0.46644400 |
| C | -5.88027700 | -0.16948700 | -0.12086900 |
| C | -7.11882000 | -2.25036300 | -0.26711200 |
| C | -7.24835300 | -0.84729000 | -0.15633200 |

|   |              |             |             |
|---|--------------|-------------|-------------|
| C | -5.62036200  | 0.69964800  | -1.38143700 |
| C | -5.57442700  | 0.56717400  | 1.21271800  |
| C | -8.23468700  | -3.09408600 | -0.33498500 |
| C | -8.52476900  | -0.28995100 | -0.11598000 |
| C | -6.35017100  | 2.03203300  | -1.51735300 |
| H | -5.84732100  | 0.07640400  | -2.26398000 |
| H | -4.53589700  | 0.89830400  | -1.41928500 |
| C | -6.65218300  | 1.46964000  | 1.81007800  |
| H | -4.65222200  | 1.15185900  | 1.05155500  |
| H | -5.32072100  | -0.19269400 | 1.97045000  |
| C | -9.49969000  | -2.52150600 | -0.29261500 |
| H | -8.10812600  | -4.17531300 | -0.42178100 |
| C | -9.63874700  | -1.13138300 | -0.18404600 |
| H | -8.67268500  | 0.78567800  | -0.02452000 |
| C | -6.09599700  | 2.68348300  | -2.87480900 |
| H | -7.43540400  | 1.89465700  | -1.38877600 |
| H | -6.02366400  | 2.72296800  | -0.72327300 |
| C | -6.13870200  | 2.25461600  | 3.01447100  |
| H | -7.03948400  | 2.17564800  | 1.06010400  |
| H | -7.51112100  | 0.85550700  | 2.12665600  |
| H | -10.38890900 | -3.15345100 | -0.34254200 |
| H | -10.63901000 | -0.69341300 | -0.14961800 |
| C | -6.78780700  | 4.03329400  | -3.03890500 |
| H | -5.00836300  | 2.80913200  | -3.02383900 |
| H | -6.43536700  | 1.99990000  | -3.67365900 |
| C | -7.19856400  | 3.15036200  | 3.64830200  |
| H | -5.75236000  | 1.54950200  | 3.77262600  |
| H | -5.27608300  | 2.87296600  | 2.70680200  |
| H | -7.87279600  | 3.90757900  | -2.87049700 |
| H | -6.43656800  | 4.72310600  | -2.25017400 |
| C | -6.56353400  | 4.67531500  | -4.40563100 |
| H | -7.57273700  | 3.86233100  | 2.89024200  |
| H | -8.06889000  | 2.53549200  | 3.94169800  |
| C | -6.69983400  | 3.92698100  | 4.86424100  |
| C | -7.26136200  | 6.02092800  | -4.56158300 |
| H | -6.91497500  | 3.98345400  | -5.19114300 |
| H | -5.47941600  | 4.80024200  | -4.57395500 |
| C | -7.75756800  | 4.83785900  | 5.47536300  |

|   |             |            |             |
|---|-------------|------------|-------------|
| H | -5.81964400 | 4.52754000 | 4.57394100  |
| H | -6.34148500 | 3.21312500 | 5.62665000  |
| H | -7.08608800 | 6.45620300 | -5.55771200 |
| H | -8.35101700 | 5.92137300 | -4.42797300 |
| H | -6.90176700 | 6.74594600 | -3.81309800 |
| H | -7.36787200 | 5.37803900 | 6.35210300  |
| H | -8.10570900 | 5.58894500 | 4.74754500  |
| H | -8.63887500 | 4.26239000 | 5.80318500  |

[PC2]

|   |              |             |             |
|---|--------------|-------------|-------------|
| C | -3.69567300  | 3.68362700  | -0.18351400 |
| C | -2.93628300  | 2.51147900  | -0.01602900 |
| C | -3.59328500  | 1.30330700  | 0.27392000  |
| C | -4.97649800  | 1.27978800  | 0.38677400  |
| C | -5.72163100  | 2.45348500  | 0.20655900  |
| C | -5.08461000  | 3.66117800  | -0.07859500 |
| H | -3.19073500  | 4.62376700  | -0.41085200 |
| H | -3.01124200  | 0.39095800  | 0.42755600  |
| H | -5.65920900  | 4.57928700  | -0.22179300 |
| C | -5.87436800  | 0.08776800  | 0.70724700  |
| C | -7.25213600  | 0.74962700  | 0.66047700  |
| C | -8.50989800  | 0.19583600  | 0.87507800  |
| C | -9.66212000  | 0.99925800  | 0.81008000  |
| C | -9.52598100  | 2.36745200  | 0.52134600  |
| C | -8.27218700  | 2.93525600  | 0.30605800  |
| C | -7.14079600  | 2.12424200  | 0.37798800  |
| H | -8.62059500  | -0.87000800 | 1.07371800  |
| H | -10.41444800 | 3.00256300  | 0.48618100  |
| H | -8.17989000  | 4.00316300  | 0.09437800  |
| C | -1.46119000  | 2.52422600  | -0.16609700 |
| C | -0.64280800  | 3.56327200  | 0.40001500  |
| C | -0.78568300  | 1.53114500  | -0.83287900 |
| C | 0.79943900   | 3.54480800  | 0.25173300  |
| C | 0.63349700   | 1.51469300  | -0.98224500 |
| H | -1.35264800  | 0.72067400  | -1.29651400 |
| C | 1.45852400   | 2.48724200  | -0.46980900 |
| H | 1.07087700   | 0.69314600  | -1.55384400 |
| N | -1.07326100  | 4.59537700  | 1.12318000  |
| N | 1.39180800   | 4.56478300  | 0.87055900  |

|   |             |             |             |
|---|-------------|-------------|-------------|
| S | 0.22840300  | 5.45784900  | 1.56552100  |
| C | -5.50991800 | -0.38908200 | 2.13966600  |
| C | -6.21999200 | -1.61457400 | 2.70638300  |
| H | -5.67359500 | 0.46340500  | 2.82193400  |
| H | -4.42391600 | -0.58445000 | 2.15267200  |
| C | -5.87157700 | -1.85934000 | 4.17264000  |
| H | -7.31220200 | -1.50109500 | 2.61858800  |
| H | -5.94919800 | -2.51015400 | 2.12368700  |
| C | -6.57216700 | -3.07982200 | 4.76206800  |
| H | -4.77786200 | -1.97746100 | 4.27696700  |
| H | -6.13872800 | -0.96479700 | 4.76386600  |
| H | -7.66473600 | -2.96117500 | 4.64395400  |
| H | -6.30029600 | -3.97640400 | 4.17558800  |
| C | -6.25100200 | -3.32510800 | 6.23401300  |
| C | -6.96909600 | -4.53779000 | 6.81353300  |
| H | -6.51740200 | -2.42537700 | 6.81627400  |
| H | -5.16032600 | -3.45073700 | 6.35189100  |
| H | -6.72316400 | -4.68589200 | 7.87653100  |
| H | -8.06307400 | -4.42556300 | 6.73715600  |
| H | -6.69351600 | -5.45979600 | 6.27574700  |
| C | -5.65445700 | -1.00421200 | -0.37516900 |
| C | -6.75382700 | -2.04062200 | -0.60516600 |
| H | -4.71207900 | -1.52231500 | -0.12437400 |
| H | -5.47050400 | -0.49818900 | -1.33773200 |
| C | -6.29951800 | -3.16596100 | -1.53145100 |
| H | -7.09323700 | -2.47864300 | 0.34551800  |
| H | -7.63586300 | -1.54910800 | -1.04740000 |
| C | -7.38867000 | -4.19776300 | -1.80752400 |
| H | -5.94843200 | -2.73639100 | -2.48726800 |
| H | -5.42344800 | -3.67128600 | -1.08620300 |
| H | -7.74137000 | -4.61902200 | -0.84842300 |
| H | -8.26418400 | -3.69435500 | -2.25624800 |
| C | -6.94065900 | -5.33595800 | -2.72121000 |
| C | -8.03046800 | -6.36982900 | -2.97656700 |
| H | -6.05956100 | -5.83079100 | -2.27607900 |
| H | -6.59777900 | -4.91439200 | -3.68251200 |
| H | -7.67860300 | -7.17263900 | -3.64304100 |
| H | -8.36419400 | -6.83840300 | -2.03628600 |

|   |             |             |             |
|---|-------------|-------------|-------------|
| H | -8.91430100 | -5.90936900 | -3.44769300 |
| C | 2.93224900  | 2.43550200  | -0.62854200 |
| C | 3.68169900  | 3.59984500  | -0.87859400 |
| C | 3.59567800  | 1.19786200  | -0.55370400 |
| C | 5.06316000  | 3.54415500  | -1.04808000 |
| H | 3.17411600  | 4.56238000  | -0.95022400 |
| C | 4.97148900  | 1.13895300  | -0.72658700 |
| H | 3.02947600  | 0.28781300  | -0.33927000 |
| C | 5.70517600  | 2.30904500  | -0.96662700 |
| H | 5.62770100  | 4.45872800  | -1.24438000 |
| C | 5.87586900  | -0.08991900 | -0.67511400 |
| C | 7.12091100  | 1.94530400  | -1.08415200 |
| C | 7.24291300  | 0.55305900  | -0.91478100 |
| C | 5.45685100  | -1.02374500 | -1.84242700 |
| C | 5.72299000  | -0.75900900 | 0.71922200  |
| C | 8.24017400  | 2.74041100  | -1.32472000 |
| C | 8.49959500  | -0.03745400 | -1.00188900 |
| C | 6.14194000  | -2.38055500 | -1.97250700 |
| H | 5.59199800  | -0.46249800 | -2.78351600 |
| H | 4.37165900  | -1.19858700 | -1.74492800 |
| C | 6.86829700  | -1.62262500 | 1.24683600  |
| H | 4.79599200  | -1.35843000 | 0.69079000  |
| H | 5.54162900  | 0.03560100  | 1.46204300  |
| C | 9.49347100  | 2.13731300  | -1.40134900 |
| H | 8.13818900  | 3.81959800  | -1.46138600 |
| C | 9.63934700  | 0.74866500  | -1.24621000 |
| H | 8.62181000  | -1.11088000 | -0.85769900 |
| C | 5.70363900  | -3.13056900 | -3.22805600 |
| H | 7.23684900  | -2.26028700 | -1.99743300 |
| H | 5.91353700  | -3.00087200 | -1.09034200 |
| C | 6.47500400  | -2.38700800 | 2.50833200  |
| H | 7.21056000  | -2.34122000 | 0.48691100  |
| H | 7.73573300  | -0.98131800 | 1.47440400  |
| H | 10.37320900 | 2.75164400  | -1.60780600 |
| C | 6.36369300  | -4.49820900 | -3.37603200 |
| H | 4.60545800  | -3.25321600 | -3.21814100 |
| H | 5.93334800  | -2.51694800 | -4.11782800 |
| C | 7.62885800  | -3.16995400 | 3.12752300  |

|   |             |             |             |
|---|-------------|-------------|-------------|
| H | 6.07314700  | -1.67832400 | 3.25521800  |
| H | 5.64776100  | -3.08012800 | 2.27107500  |
| H | 7.46182300  | -4.37248700 | -3.37741500 |
| H | 6.13043800  | -5.11349100 | -2.48798100 |
| C | 5.94256900  | -5.25147500 | -4.63509800 |
| H | 8.04533400  | -3.86324600 | 2.37403800  |
| H | 8.44663100  | -2.47152700 | 3.38168600  |
| C | 7.23653200  | -3.95955800 | 4.37382400  |
| C | 6.61149000  | -6.61330200 | -4.77727000 |
| H | 6.17400500  | -4.63337100 | -5.52045500 |
| H | 4.84559000  | -5.37792800 | -4.63170800 |
| C | 8.40046200  | -4.71945600 | 4.99842400  |
| H | 6.42958700  | -4.66724000 | 4.11474800  |
| H | 6.80629200  | -3.26734100 | 5.11898900  |
| H | 6.28824700  | -7.12866000 | -5.69506300 |
| H | 7.70870400  | -6.51532100 | -4.81867400 |
| H | 6.36922800  | -7.26812400 | -3.92418600 |
| H | 8.08591400  | -5.27738200 | 5.89418000  |
| H | 8.83037000  | -5.44433500 | 4.28769100  |
| H | 9.20815800  | -4.03264100 | 5.29990200  |
| C | 10.97996000 | 0.11112000  | -1.33825800 |
| C | 11.14183700 | -1.11734700 | -2.00397300 |
| C | 12.10318800 | 0.72455100  | -0.75685600 |
| C | 12.39094000 | -1.72640700 | -2.10711400 |
| H | 10.27493600 | -1.59339700 | -2.46860800 |
| C | 13.34806800 | 0.11634100  | -0.84825500 |
| H | 11.98887400 | 1.66889600  | -0.21800500 |
| C | 13.49480300 | -1.10134000 | -1.52782000 |
| H | 12.49850700 | -2.67530000 | -2.63801900 |
| C | 14.67708000 | 0.59909300  | -0.27152300 |
| C | 14.90871600 | -1.48757000 | -1.47468900 |
| C | 15.61742400 | -0.50416000 | -0.75909600 |
| C | 14.52921500 | 0.59279600  | 1.27452000  |
| C | 14.99127300 | 2.00665200  | -0.84874600 |
| C | 15.56086500 | -2.60401200 | -1.99435000 |
| C | 16.98596400 | -0.65677300 | -0.56102500 |
| C | 15.69080800 | 1.09205100  | 2.12815700  |
| H | 14.28451000 | -0.44074800 | 1.57652200  |

|   |             |             |             |
|---|-------------|-------------|-------------|
| H | 13.64033900 | 1.19912700  | 1.51978500  |
| C | 16.44451600 | 2.47782800  | -0.87761200 |
| H | 14.38377100 | 2.73248800  | -0.28004800 |
| H | 14.61034300 | 2.04356900  | -1.88320300 |
| C | 16.93338900 | -2.73872400 | -1.79769700 |
| H | 15.00893700 | -3.36128700 | -2.55643100 |
| C | 17.66284700 | -1.77496400 | -1.08078700 |
| H | 17.54733000 | 0.08168000  | 0.01133700  |
| C | 15.42743600 | 0.89745800  | 3.61971700  |
| H | 16.62216500 | 0.56708600  | 1.86180600  |
| H | 15.86702900 | 2.16286300  | 1.93529500  |
| C | 16.56847200 | 3.94009400  | -1.29706100 |
| H | 16.92355400 | 2.34661400  | 0.10459000  |
| H | 17.01874100 | 1.85516200  | -1.58314400 |
| H | 17.45054100 | -3.60077800 | -2.22532500 |
| C | 16.56362000 | 1.39478500  | 4.50808800  |
| H | 14.49177200 | 1.41602700  | 3.89672900  |
| H | 15.25089900 | -0.17468200 | 3.82001000  |
| C | 18.01221200 | 4.42898300  | -1.36347000 |
| H | 16.08752500 | 4.08085200  | -2.28210100 |
| H | 16.00153600 | 4.57239900  | -0.59010200 |
| H | 17.49922500 | 0.87920600  | 4.22464900  |
| H | 16.73818700 | 2.46835800  | 4.31226500  |
| C | 16.31012600 | 1.19024100  | 5.99955500  |
| H | 18.48863400 | 4.28843500  | -0.37596100 |
| H | 18.58148300 | 3.79352600  | -2.06606500 |
| C | 18.14912700 | 5.89029000  | -1.78299400 |
| C | 17.45192600 | 1.68398500  | 6.87958600  |
| H | 16.13294700 | 0.11744200  | 6.19176600  |
| H | 15.37607100 | 1.70711600  | 6.28183200  |
| C | 19.59454100 | 6.37036200  | -1.83151100 |
| H | 17.57272800 | 6.52275600  | -1.08509700 |
| H | 17.68047300 | 6.02810800  | -2.77336300 |
| H | 17.23975200 | 1.52186500  | 7.94783100  |
| H | 18.39267900 | 1.15995000  | 6.64382700  |
| H | 17.62928400 | 2.76216900  | 6.73421800  |
| H | 19.66179200 | 7.42609900  | -2.13715500 |
| H | 20.07833600 | 6.27741800  | -0.84530100 |



|   |              |             |             |
|---|--------------|-------------|-------------|
| H | 20.18799200  | 5.77723900  | -2.54647800 |
| C | -11.00245100 | 0.39928300  | 1.04703000  |
| C | -11.17599600 | -0.58633500 | 2.03585100  |
| C | -12.11377500 | 0.80361300  | 0.28674300  |
| C | -12.42220300 | -1.16155600 | 2.27532300  |
| H | -10.32158300 | -0.89420200 | 2.64351900  |
| C | -13.35697800 | 0.23016700  | 0.51888800  |
| H | -11.99258900 | 1.55508500  | -0.49816700 |
| C | -13.51347700 | -0.74693600 | 1.51274900  |
| H | -12.53720500 | -1.91900800 | 3.05443500  |
| C | -14.67637500 | 0.52020400  | -0.19326400 |
| C | -14.92227000 | -1.15440400 | 1.53730600  |
| C | -15.61890200 | -0.42085600 | 0.55895500  |
| C | -14.50272000 | 0.10514900  | -1.67909400 |
| C | -15.01658000 | 2.02724500  | -0.02110800 |
| C | -15.58084900 | -2.09137900 | 2.33175300  |
| C | -16.98064300 | -0.64078000 | 0.38017800  |
| C | -15.64683600 | 0.37489000  | -2.65159500 |
| H | -14.26614100 | -0.97327500 | -1.69612500 |
| H | -13.60388600 | 0.61967300  | -2.05964500 |
| C | -16.48041000 | 2.45519800  | -0.11399500 |
| H | -14.42319300 | 2.58328600  | -0.76805700 |
| H | -14.63901500 | 2.35248300  | 0.96278000  |
| C | -16.94733500 | -2.29333000 | 2.14945300  |
| H | -15.03905300 | -2.65477500 | 3.09539000  |
| C | -17.66483700 | -1.57605300 | 1.17695500  |
| H | -17.53174800 | -0.09768600 | -0.38723100 |
| C | -15.37556500 | -0.21347600 | -4.03418900 |
| H | -16.58890400 | -0.04831100 | -2.26792800 |
| H | -15.80794100 | 1.46100100  | -2.75093000 |
| C | -16.64770900 | 3.97225500  | -0.11035700 |
| H | -16.95669300 | 2.04723300  | -1.01856100 |
| H | -17.03687300 | 2.03556200  | 0.74004400  |
| H | -17.47032800 | -3.00827600 | 2.78908100  |
| C | -16.50019600 | 0.03901000  | -5.03365500 |
| H | -14.43163400 | 0.20154300  | -4.43177600 |
| H | -15.21195300 | -1.30189900 | -3.93766500 |
| C | -18.10928200 | 4.41058100  | -0.12688200 |

|   |              |             |             |
|---|--------------|-------------|-------------|
| H | -16.14815800 | 4.39578500  | 0.77965700  |
| H | -16.12685700 | 4.40119200  | -0.98539200 |
| H | -17.44523800 | -0.36257900 | -4.62448200 |
| H | -16.65606100 | 1.12759500  | -5.14342700 |
| C | -16.24883700 | -0.57477500 | -6.40860400 |
| H | -18.60803000 | 3.97557700  | -1.01213100 |
| H | -18.62570700 | 3.98288300  | 0.75167500  |
| C | -18.30324400 | 5.92466800  | -0.13503900 |
| C | -17.38250600 | -0.32975300 | -7.39692000 |
| H | -16.08757900 | -1.66108700 | -6.29405700 |
| H | -15.30709400 | -0.16999500 | -6.81948200 |
| C | -19.76907800 | 6.34178700  | -0.14624100 |
| H | -17.79131900 | 6.35143300  | -1.01535500 |
| H | -17.80269000 | 6.35923500  | 0.74800100  |
| H | -17.17364800 | -0.78986000 | -8.37523700 |
| H | -18.33114700 | -0.75169400 | -7.02626700 |
| H | -17.54255100 | 0.74824700  | -7.56234900 |
| H | -19.87978100 | 7.43732900  | -0.15338000 |
| H | -20.28770700 | 5.94829100  | -1.03577600 |
| H | -20.29833100 | 5.95872900  | 0.74158400  |
| C | 19.12769200  | -1.92550300 | -0.87322800 |
| C | 19.97981400  | -0.80599800 | -0.85777600 |
| C | 19.71228000  | -3.18277900 | -0.68254700 |
| C | 21.34612300  | -0.94076800 | -0.66076200 |
| H | 19.56815300  | 0.19315700  | -1.02151000 |
| C | 21.08488000  | -3.33602900 | -0.48238900 |
| H | 19.08376000  | -4.07684900 | -0.66980000 |
| C | 21.91603600  | -2.20914600 | -0.46872700 |
| H | 22.00038100  | -0.06620700 | -0.65856800 |
| H | 21.49008400  | -4.33697700 | -0.33117400 |
| C | -19.12545400 | -1.78642500 | 0.99361600  |
| C | -19.97445000 | -0.72375300 | 0.66156800  |
| C | -19.70855000 | -3.05704300 | 1.14746400  |
| C | -21.34720800 | -0.90274800 | 0.48575900  |
| H | -19.56542200 | 0.28396800  | 0.55202700  |
| C | -21.07090800 | -3.25255600 | 0.97544900  |
| H | -19.08025800 | -3.91779800 | 1.38974500  |
| C | -21.90818800 | -2.17618400 | 0.64188100  |

|   |              |             |             |
|---|--------------|-------------|-------------|
| H | -21.96544100 | -0.04004500 | 0.23513100  |
| H | -21.51308200 | -4.24469400 | 1.08917000  |
| O | -23.21594200 | -2.45709200 | 0.49419100  |
| O | 23.24829600  | -2.24747900 | -0.28161400 |
| C | 23.87127900  | -3.49310000 | -0.07113300 |
| H | 24.94111700  | -3.29052500 | 0.06400800  |
| H | 23.48758400  | -3.99322700 | 0.83423100  |
| H | 23.74328000  | -4.16656100 | -0.93548100 |
| C | -24.10571500 | -1.41679200 | 0.16285500  |
| H | -23.85381800 | -0.95509900 | -0.80683600 |
| H | -25.10251200 | -1.86939900 | 0.08966700  |
| H | -24.12591300 | -0.63372400 | 0.93944800  |

**[PC2]\***

|   |              |             |             |
|---|--------------|-------------|-------------|
| C | -3.73484400  | 3.32113800  | -1.75303500 |
| C | -2.93147800  | 2.24607300  | -1.28896300 |
| C | -3.58348800  | 1.04907400  | -0.88915600 |
| C | -4.96128400  | 0.95513600  | -0.94150800 |
| C | -5.73169100  | 2.03130700  | -1.41502700 |
| C | -5.11646600  | 3.21604100  | -1.82578300 |
| H | -3.25320300  | 4.24237300  | -2.07462600 |
| H | -3.00403400  | 0.20814900  | -0.50394100 |
| H | -5.70903500  | 4.05258500  | -2.20308300 |
| C | -5.84324000  | -0.22213500 | -0.53013500 |
| C | -7.22933000  | 0.33102000  | -0.86665300 |
| C | -8.48060700  | -0.25800200 | -0.71969700 |
| C | -9.64451300  | 0.44289900  | -1.08146800 |
| C | -9.52836000  | 1.75127500  | -1.58293300 |
| C | -8.28360700  | 2.35678800  | -1.72753500 |
| C | -7.13966000  | 1.64313800  | -1.37011000 |
| H | -8.57613600  | -1.26369300 | -0.31179200 |
| H | -10.42654900 | 2.29519900  | -1.88443000 |
| H | -8.20598400  | 3.37127300  | -2.12552500 |
| C | -1.48346100  | 2.34006200  | -1.23417500 |
| C | -0.76142200  | 3.58039500  | -1.14218100 |
| C | -0.66416100  | 1.13960800  | -1.27174500 |
| C | 0.70662200   | 3.60937100  | -1.12794500 |
| C | 0.68865700   | 1.16302900  | -1.27112500 |

|   |             |             |             |
|---|-------------|-------------|-------------|
| H | -1.16091200 | 0.17332100  | -1.36013900 |
| C | 1.47778300  | 2.39091300  | -1.21700100 |
| H | 1.20730100  | 0.20983500  | -1.35491800 |
| N | -1.30589900 | 4.77970600  | -1.02253200 |
| N | 1.19057800  | 4.83263400  | -0.99926900 |
| S | -0.08238700 | 5.89930100  | -0.90787400 |
| C | -5.65117500 | -0.42924700 | 0.99682500  |
| C | -6.35454800 | -1.60302100 | 1.67119400  |
| H | -5.95129700 | 0.50665400  | 1.49965500  |
| H | -4.56744800 | -0.53672900 | 1.17444700  |
| C | -6.13871100 | -1.60930600 | 3.18284800  |
| H | -7.43717600 | -1.57706100 | 1.46788900  |
| H | -5.97871600 | -2.55264500 | 1.25616100  |
| C | -6.81219600 | -2.78455500 | 3.88510700  |
| H | -5.05485200 | -1.62681400 | 3.39748200  |
| H | -6.51823700 | -0.66338100 | 3.60952100  |
| H | -7.89567200 | -2.76589200 | 3.66777200  |
| H | -6.43333400 | -3.73035300 | 3.45670400  |
| C | -6.60361500 | -2.79873000 | 5.39727300  |
| C | -7.28150800 | -3.97539700 | 6.08886500  |
| H | -6.98180800 | -1.85293700 | 5.82370000  |
| H | -5.52077900 | -2.81753800 | 5.61289100  |
| H | -7.11328300 | -3.95700600 | 7.17691700  |
| H | -8.37063800 | -3.96389700 | 5.91918500  |
| H | -6.89755200 | -4.93604400 | 5.70795400  |
| C | -5.44042600 | -1.47105800 | -1.36307700 |
| C | -6.48180600 | -2.57187100 | -1.56202000 |
| H | -4.54039600 | -1.90013900 | -0.88878900 |
| H | -5.11921500 | -1.13021100 | -2.36143300 |
| C | -5.88409100 | -3.84248300 | -2.15980200 |
| H | -6.97201300 | -2.82770800 | -0.61093200 |
| H | -7.27983700 | -2.20449900 | -2.22806500 |
| C | -6.92416900 | -4.93132100 | -2.40691300 |
| H | -5.37081500 | -3.60078500 | -3.10805100 |
| H | -5.10356700 | -4.23087900 | -1.48072100 |
| H | -7.44988900 | -5.14988800 | -1.45953100 |
| H | -7.69542500 | -4.54809400 | -3.09964400 |
| C | -6.34347000 | -6.22680200 | -2.96791500 |

|   |             |             |             |
|---|-------------|-------------|-------------|
| C | -7.39468400 | -7.30524300 | -3.20123400 |
| H | -5.57231800 | -6.60674300 | -2.27486500 |
| H | -5.82037100 | -6.00996100 | -3.91584300 |
| H | -6.94702300 | -8.22661500 | -3.60516600 |
| H | -7.91097000 | -7.56791100 | -2.26340600 |
| H | -8.16117200 | -6.96571000 | -3.91700900 |
| C | 2.92418500  | 2.33540000  | -1.25861700 |
| C | 3.71911400  | 3.50010000  | -1.46109900 |
| C | 3.60665800  | 1.09249500  | -1.11241800 |
| C | 5.10316300  | 3.44242700  | -1.50765500 |
| H | 3.22299000  | 4.45948900  | -1.58577300 |
| C | 4.98506500  | 1.03968200  | -1.15602200 |
| H | 3.05529300  | 0.16771900  | -0.94259100 |
| C | 5.74108300  | 2.20980400  | -1.34827900 |
| H | 5.68070400  | 4.35535100  | -1.66975400 |
| C | 5.88615200  | -0.18612900 | -1.01416200 |
| C | 7.15579000  | 1.85128300  | -1.33490100 |
| C | 7.26713800  | 0.46159300  | -1.13303200 |
| C | 5.58093400  | -1.12136900 | -2.21564600 |
| C | 5.61051600  | -0.85376900 | 0.36125500  |
| C | 8.28869300  | 2.65192300  | -1.48374500 |
| C | 8.53005700  | -0.11996500 | -1.08654100 |
| C | 6.30161000  | -2.46317700 | -2.30230900 |
| H | 5.78265900  | -0.54983300 | -3.13853100 |
| H | 4.49454100  | -1.31492900 | -2.20951100 |
| C | 6.70473100  | -1.71915800 | 0.98412600  |
| H | 4.68775700  | -1.45024700 | 0.25207700  |
| H | 5.36782100  | -0.05776500 | 1.08482600  |
| C | 9.54510600  | 2.05685400  | -1.43032800 |
| H | 8.19294800  | 3.72788700  | -1.64650400 |
| C | 9.68322200  | 0.67156200  | -1.23305800 |
| H | 8.64483100  | -1.18868200 | -0.90730300 |
| C | 6.01248400  | -3.18165400 | -3.61798000 |
| H | 7.39025600  | -2.32374700 | -2.20903800 |
| H | 5.99486400  | -3.11137400 | -1.46505300 |
| C | 6.21865700  | -2.46475600 | 2.22418500  |
| H | 7.09567900  | -2.44947900 | 0.25931000  |
| H | 7.55799500  | -1.08045900 | 1.26581500  |

|   |             |             |             |
|---|-------------|-------------|-------------|
| H | 10.43670200 | 2.67393000  | -1.56281300 |
| C | 6.70387800  | -4.53653900 | -3.73738000 |
| H | 4.92161500  | -3.31543400 | -3.73256200 |
| H | 6.32872400  | -2.53715800 | -4.45793600 |
| C | 7.32443000  | -3.24858400 | 2.92496000  |
| H | 5.77514400  | -1.74436200 | 2.93539400  |
| H | 5.40315300  | -3.15414500 | 1.94037000  |
| H | 7.79137400  | -4.40254800 | -3.59227900 |
| H | 6.36748800  | -5.19412700 | -2.91531800 |
| C | 6.45869800  | -5.23273200 | -5.07351000 |
| H | 7.78247600  | -3.95282400 | 2.20661900  |
| H | 8.12971700  | -2.55245600 | 3.22179100  |
| C | 6.85104200  | -4.02130600 | 4.15335300  |
| C | 7.15626100  | -6.58260600 | -5.18871500 |
| H | 6.79652800  | -4.57167300 | -5.89088400 |
| H | 5.37228600  | -5.36496700 | -5.22005800 |
| C | 7.97028500  | -4.78032300 | 4.85606800  |
| H | 6.05729900  | -4.72772400 | 3.85323000  |
| H | 6.38020800  | -3.31872100 | 4.86338100  |
| H | 6.97061600  | -7.05296300 | -6.16686600 |
| H | 8.24724500  | -6.47750300 | -5.07087700 |
| H | 6.80591500  | -7.28109500 | -4.41119300 |
| H | 7.59772200  | -5.32737300 | 5.73604300  |
| H | 8.43958500  | -5.51408800 | 4.18039700  |
| H | 8.76131500  | -4.09418000 | 5.20033500  |
| C | 11.03151200 | 0.04767100  | -1.16990700 |
| C | 11.26810300 | -1.20921800 | -1.75557600 |
| C | 12.08928500 | 0.70579600  | -0.51885000 |
| C | 12.52697200 | -1.80509500 | -1.70744100 |
| H | 10.45520700 | -1.72074300 | -2.27682100 |
| C | 13.34324500 | 0.11321800  | -0.46307300 |
| H | 11.91642000 | 1.67321300  | -0.04003700 |
| C | 13.56528600 | -1.13623300 | -1.05962400 |
| H | 12.69295500 | -2.77692900 | -2.17843500 |
| C | 14.60853100 | 0.65078000  | 0.20068100  |
| C | 14.97194800 | -1.49758500 | -0.85275300 |
| C | 15.60091500 | -0.46369500 | -0.13352600 |
| C | 14.32377000 | 0.73668700  | 1.72479100  |

|   |             |             |             |
|---|-------------|-------------|-------------|
| C | 14.95811200 | 2.02618500  | -0.43104100 |
| C | 15.68235500 | -2.63194500 | -1.24142400 |
| C | 16.94691500 | -0.58063700 | 0.19705900  |
| C | 15.39067800 | 1.32475500  | 2.64302300  |
| H | 14.07813900 | -0.28239400 | 2.07165500  |
| H | 13.40193900 | 1.32985100  | 1.85073100  |
| C | 16.40439800 | 2.51497100  | -0.36121700 |
| H | 14.29536900 | 2.77568500  | 0.03626600  |
| H | 14.67129500 | 1.99526300  | -1.49559900 |
| C | 17.03259900 | -2.73106600 | -0.91261800 |
| H | 15.19335300 | -3.43101800 | -1.80392300 |
| C | 17.68250000 | -1.71446900 | -0.19199600 |
| H | 17.44334900 | 0.20081500  | 0.77194700  |
| C | 14.99686400 | 1.21479900  | 4.11433500  |
| H | 16.35559300 | 0.81388400  | 2.49495100  |
| H | 15.55622200 | 2.38657800  | 2.39731000  |
| C | 16.54687100 | 3.96186200  | -0.82543800 |
| H | 16.80565500 | 2.42600900  | 0.65978400  |
| H | 17.03786700 | 1.87351200  | -0.99588000 |
| H | 17.59725800 | -3.60802000 | -1.23789200 |
| C | 16.02945500 | 1.80488700  | 5.06972700  |
| H | 14.02435500 | 1.71561400  | 4.27112700  |
| H | 14.83390500 | 0.15136300  | 4.36609300  |
| C | 17.99156400 | 4.45200000  | -0.84139700 |
| H | 16.11284300 | 4.06743200  | -1.83635800 |
| H | 15.94563900 | 4.61606600  | -0.16834700 |
| H | 17.00381300 | 1.31036800  | 4.90336800  |
| H | 16.18618400 | 2.87173300  | 4.82753500  |
| C | 15.64518400 | 1.67413000  | 6.54148200  |
| H | 18.42745100 | 4.33384200  | 0.16756900  |
| H | 18.58971200 | 3.80214500  | -1.50588400 |
| C | 18.14476100 | 5.90365900  | -1.28789500 |
| C | 16.68308600 | 2.25697100  | 7.49270700  |
| H | 15.48529600 | 0.60747500  | 6.77796200  |
| H | 14.67245200 | 2.16994500  | 6.70686600  |
| C | 19.59221200 | 6.37968300  | -1.30397400 |
| H | 17.54934700 | 6.55202100  | -0.62120400 |
| H | 17.70595100 | 6.02115900  | -2.29446000 |

|   |              |             |             |
|---|--------------|-------------|-------------|
| H | 16.37971300  | 2.13934600  | 8.54464000  |
| H | 17.65931700  | 1.75983200  | 7.36995400  |
| H | 16.83521000  | 3.33290800  | 7.30738400  |
| H | 19.67124100  | 7.42842800  | -1.63017400 |
| H | 20.04730000  | 6.30662900  | -0.30254600 |
| H | 20.20452400  | 5.77022200  | -1.98872200 |
| C | -10.97752700 | -0.20284300 | -0.94793100 |
| C | -11.13671700 | -1.57220000 | -1.22858600 |
| C | -12.09974000 | 0.54539600  | -0.55088900 |
| C | -12.37981600 | -2.19307700 | -1.12657700 |
| H | -10.27422100 | -2.15826800 | -1.55528400 |
| C | -13.34008700 | -0.06931100 | -0.44543100 |
| H | -11.98807500 | 1.60591300  | -0.31036800 |
| C | -13.48201900 | -1.43398100 | -0.73524100 |
| H | -12.48511400 | -3.25565600 | -1.35817500 |
| C | -14.66683500 | 0.55162400  | -0.01389200 |
| C | -14.89032000 | -1.79782400 | -0.54861600 |
| C | -15.59839800 | -0.65553800 | -0.13126800 |
| C | -15.01358600 | 1.67583900  | -1.02515500 |
| C | -14.51429300 | 1.07923500  | 1.44266700  |
| C | -15.54142900 | -3.01589500 | -0.73440400 |
| C | -16.96946300 | -0.74296300 | 0.08720700  |
| C | -16.22389700 | 2.56203300  | -0.74795600 |
| H | -15.12544800 | 1.21039000  | -2.02009400 |
| H | -14.12878000 | 2.33174100  | -1.09306700 |
| C | -15.76844500 | 1.17894100  | 2.30962600  |
| H | -14.02669500 | 2.06806300  | 1.38318200  |
| H | -13.80106000 | 0.42497800  | 1.97103100  |
| C | -16.91273000 | -3.09205900 | -0.50135300 |
| H | -14.98728300 | -3.90254700 | -1.05189000 |
| C | -17.64367700 | -1.96396500 | -0.09115500 |
| H | -17.53842700 | 0.13710400  | 0.38768100  |
| C | -16.43269100 | 3.59915900  | -1.84904200 |
| H | -17.13872600 | 1.95607100  | -0.64645600 |
| H | -16.08762100 | 3.08884200  | 0.21056700  |
| C | -15.50501300 | 1.87702400  | 3.64118100  |
| H | -16.57610000 | 1.71034400  | 1.78314400  |
| H | -16.15280400 | 0.16558200  | 2.51116000  |



|   |              |             |             |
|---|--------------|-------------|-------------|
| H | -17.42273700 | -4.05045800 | -0.62441700 |
| C | -17.59479800 | 4.55050200  | -1.58049800 |
| H | -15.50429600 | 4.18552200  | -1.97318300 |
| H | -16.59589200 | 3.08355100  | -2.81248900 |
| C | -16.72593100 | 1.89581800  | 4.55605200  |
| H | -14.66649400 | 1.37678100  | 4.15889600  |
| H | -15.17120800 | 2.91341900  | 3.45279800  |
| H | -18.52775700 | 3.96861900  | -1.46922400 |
| H | -17.43512300 | 5.05448000  | -0.60991300 |
| C | -17.78550600 | 5.60539700  | -2.66740100 |
| H | -17.56664100 | 2.38575900  | 4.03159200  |
| H | -17.05230600 | 0.85687400  | 4.74490100  |
| C | -16.48976000 | 2.59746000  | 5.89112600  |
| C | -18.93609400 | 6.56368600  | -2.38489200 |
| H | -17.95233400 | 5.10221800  | -3.63602300 |
| H | -16.84808100 | 6.17767600  | -2.78143000 |
| C | -17.71436000 | 2.59028000  | 6.79808700  |
| H | -16.17565600 | 3.63914000  | 5.70271400  |
| H | -15.64288000 | 2.11386100  | 6.40908100  |
| H | -19.04115100 | 7.31679800  | -3.18135800 |
| H | -19.89479500 | 6.02527100  | -2.30633600 |
| H | -18.78148400 | 7.10168700  | -1.43525400 |
| H | -17.51649100 | 3.10392900  | 7.75173900  |
| H | -18.56900000 | 3.09480200  | 6.31815200  |
| H | -18.02874400 | 1.56013600  | 7.03308800  |
| C | 19.12543500  | -1.82408300 | 0.15091600  |
| C | 19.95428600  | -0.68749400 | 0.18200500  |
| C | 19.71254700  | -3.05787200 | 0.45443800  |
| C | 21.30089100  | -0.78386500 | 0.49999800  |
| H | 19.54184700  | 0.29383600  | -0.06557300 |
| C | 21.06546500  | -3.17238200 | 0.77731700  |
| H | 19.10022800  | -3.96319100 | 0.45985400  |
| C | 21.87384100  | -2.02924400 | 0.80203400  |
| H | 21.93775500  | 0.10338100  | 0.51240400  |
| H | 21.47252800  | -4.15613200 | 1.01269100  |
| C | -19.10610600 | -2.05530000 | 0.16141600  |
| C | -19.70918100 | -1.34241700 | 1.20441700  |
| C | -19.93599800 | -2.86280600 | -0.63666800 |

|   |              |             |             |
|---|--------------|-------------|-------------|
| C | -21.07986300 | -1.42069500 | 1.45507700  |
| H | -19.09621800 | -0.71776600 | 1.85959200  |
| C | -21.30029500 | -2.95019100 | -0.40239400 |
| H | -19.50842300 | -3.42046600 | -1.47351100 |
| C | -21.88960000 | -2.22937500 | 0.64817700  |
| H | -21.50016300 | -0.85367600 | 2.28629900  |
| H | -21.93799600 | -3.57241300 | -1.03405200 |
| O | -23.21872600 | -2.37269400 | 0.80351700  |
| O | 23.18646800  | -2.03051000 | 1.09889600  |
| C | 23.81258000  | -3.25143800 | 1.41673500  |
| H | 24.86646000  | -3.02142200 | 1.61756400  |
| H | 23.37182800  | -3.71446700 | 2.31585400  |
| H | 23.75950000  | -3.96926400 | 0.58070900  |
| C | -23.86574300 | -1.66083400 | 1.83246000  |
| H | -23.74868100 | -0.57072400 | 1.71021000  |
| H | -24.93181600 | -1.91133800 | 1.76473100  |
| H | -23.49338400 | -1.95358100 | 2.82879200  |

[PC2]-

|   |              |             |             |
|---|--------------|-------------|-------------|
| C | -3.76113100  | 3.82762100  | -0.04744400 |
| C | -2.94489400  | 2.67787800  | 0.02783000  |
| C | -3.57517400  | 1.43238800  | 0.23637800  |
| C | -4.95560300  | 1.35135400  | 0.35090700  |
| C | -5.74614200  | 2.50568300  | 0.26213100  |
| C | -5.14740100  | 3.74979000  | 0.06382900  |
| H | -3.29031600  | 4.79867500  | -0.19735900 |
| H | -2.97005900  | 0.52695700  | 0.32923300  |
| H | -5.75272700  | 4.65736800  | -0.00664000 |
| C | -5.80938300  | 0.10625200  | 0.58540900  |
| C | -7.21149700  | 0.71794200  | 0.59503000  |
| C | -8.44637600  | 0.10490000  | 0.77670700  |
| C | -9.62864900  | 0.86777000  | 0.78652600  |
| C | -9.54164800  | 2.25833400  | 0.60609700  |
| C | -8.31121600  | 2.88536300  | 0.42109600  |
| C | -7.14998000  | 2.11413400  | 0.41811400  |
| H | -8.51505200  | -0.97643800 | 0.89347900  |
| H | -10.45066300 | 2.86405100  | 0.63085200  |
| H | -8.26039300  | 3.96906400  | 0.29059300  |
| C | -1.47435800  | 2.74631200  | -0.12539900 |

|   |             |             |             |
|---|-------------|-------------|-------------|
| C | -0.70068200 | 3.85969300  | 0.31956200  |
| C | -0.76602100 | 1.67790100  | -0.71107000 |
| C | 0.75985300  | 3.85809200  | 0.17938900  |
| C | 0.61844500  | 1.67746800  | -0.84762800 |
| H | -1.32452600 | 0.82646800  | -1.10774900 |
| C | 1.43120300  | 2.74342700  | -0.40960800 |
| H | 1.08566200  | 0.82548200  | -1.34710900 |
| N | -1.17585800 | 4.96294400  | 0.91535700  |
| N | 1.33963900  | 4.96003300  | 0.67666500  |
| S | 0.12838400  | 5.93463700  | 1.27702100  |
| C | -5.42215100 | -0.46568500 | 1.97598900  |
| C | -6.05898300 | -1.77453500 | 2.43374600  |
| H | -5.63339400 | 0.31673700  | 2.72590500  |
| H | -4.32706900 | -0.60125200 | 1.97954600  |
| C | -5.68859900 | -2.12176800 | 3.87350900  |
| H | -7.15663600 | -1.72009700 | 2.35396900  |
| H | -5.73709400 | -2.59773600 | 1.77476300  |
| C | -6.27472100 | -3.44825100 | 4.34785600  |
| H | -4.58840500 | -2.15212000 | 3.97248900  |
| H | -6.03090500 | -1.31194700 | 4.54268800  |
| H | -7.37324300 | -3.42409600 | 4.22732400  |
| H | -5.91630400 | -4.26087300 | 3.69009100  |
| C | -5.93631100 | -3.78584100 | 5.79746400  |
| C | -6.51582600 | -5.11732800 | 6.25963600  |
| H | -6.30444400 | -2.97669000 | 6.45244000  |
| H | -4.83897300 | -3.79882300 | 5.92020600  |
| H | -6.26745300 | -5.32358700 | 7.31238000  |
| H | -7.61445500 | -5.12663400 | 6.16861600  |
| H | -6.12762900 | -5.95309200 | 5.65474700  |
| C | -5.55526500 | -0.89603900 | -0.57304800 |
| C | -6.62042800 | -1.94632100 | -0.88725000 |
| H | -4.59791200 | -1.40244500 | -0.35730400 |
| H | -5.38318000 | -0.31598900 | -1.49512900 |
| C | -6.11433200 | -2.98714500 | -1.88253300 |
| H | -6.95739000 | -2.45939600 | 0.02605100  |
| H | -7.51175600 | -1.45162400 | -1.30704600 |
| C | -7.17006800 | -4.01125500 | -2.28756400 |
| H | -5.73582700 | -2.47603400 | -2.78630400 |

|   |             |             |             |
|---|-------------|-------------|-------------|
| H | -5.24533300 | -3.51205100 | -1.44612300 |
| H | -7.56022400 | -4.51062700 | -1.38202300 |
| H | -8.03242500 | -3.48832600 | -2.73949000 |
| C | -6.65513000 | -5.06734900 | -3.26222100 |
| C | -7.71488100 | -6.08466000 | -3.66701700 |
| H | -5.79560100 | -5.59008800 | -2.80693800 |
| H | -6.26125300 | -4.56612300 | -4.16380700 |
| H | -7.31351400 | -6.83034500 | -4.37096400 |
| H | -8.10149300 | -6.62817500 | -2.78936800 |
| H | -8.57292200 | -5.59397100 | -4.15513000 |
| C | 2.90334700  | 2.67019100  | -0.54592800 |
| C | 3.70050100  | 3.82412700  | -0.71426700 |
| C | 3.55435400  | 1.41707800  | -0.52874000 |
| C | 5.08335100  | 3.74488900  | -0.86260400 |
| H | 3.21660500  | 4.80014900  | -0.72178200 |
| C | 4.93093700  | 1.33445300  | -0.67872300 |
| H | 2.97419000  | 0.50452800  | -0.37147700 |
| C | 5.70092800  | 2.49468100  | -0.84202000 |
| H | 5.67055700  | 4.65762800  | -0.99351800 |
| C | 5.80484500  | 0.08059600  | -0.66990200 |
| C | 7.10850700  | 2.10077800  | -0.95065800 |
| C | 7.19341300  | 0.69844600  | -0.84506900 |
| C | 5.39580300  | -0.77857500 | -1.89679200 |
| C | 5.60272200  | -0.64963900 | 0.68561800  |
| C | 8.25406500  | 2.87420600  | -1.13263900 |
| C | 8.43639800  | 0.08068700  | -0.93154100 |
| C | 6.06157300  | -2.13769600 | -2.09154100 |
| H | 5.56753000  | -0.16519100 | -2.79871900 |
| H | 4.30497200  | -0.93491300 | -1.83893800 |
| C | 6.68599400  | -1.60953500 | 1.17615300  |
| H | 4.64092100  | -1.18842700 | 0.62148200  |
| H | 5.46341900  | 0.11785700  | 1.46559900  |
| C | 9.49328700  | 2.24225000  | -1.21607200 |
| H | 8.18379100  | 3.96108200  | -1.22128900 |
| C | 9.60202000  | 0.84523600  | -1.12092300 |
| H | 8.52820800  | -1.00082500 | -0.83084200 |
| C | 5.72215300  | -2.76753300 | -3.44048000 |
| H | 7.15645700  | -2.04432600 | -2.01657700 |

|   |             |             |             |
|---|-------------|-------------|-------------|
| H | 5.75102900  | -2.82640600 | -1.28876100 |
| C | 6.25011200  | -2.37624000 | 2.42218800  |
| H | 6.96362900  | -2.33023900 | 0.39234600  |
| H | 7.60244700  | -1.04285200 | 1.40918900  |
| H | 10.39087300 | 2.84313000  | -1.38099500 |
| C | 6.37464500  | -4.13138100 | -3.64500700 |
| H | 4.62592600  | -2.86475400 | -3.54003900 |
| H | 6.04187300  | -2.08536500 | -4.24872200 |
| C | 7.31408300  | -3.33304800 | 2.95139400  |
| H | 5.97508700  | -1.65802200 | 3.21566200  |
| H | 5.32967900  | -2.94476600 | 2.19661100  |
| H | 7.46703500  | -4.03192600 | -3.50852500 |
| H | 6.03307000  | -4.82291600 | -2.85350400 |
| C | 6.09622800  | -4.75299800 | -5.01120500 |
| H | 7.57977500  | -4.05557600 | 2.15837700  |
| H | 8.23931100  | -2.76871900 | 3.16811800  |
| C | 6.88562300  | -4.09540500 | 4.20266800  |
| C | 6.76147900  | -6.11078000 | -5.20080300 |
| H | 6.43953600  | -4.06006100 | -5.79936500 |
| H | 5.00540000  | -4.85379300 | -5.14975100 |
| C | 7.94463000  | -5.06430400 | 4.71425600  |
| H | 5.95333400  | -4.64709100 | 3.98839200  |
| H | 6.63269200  | -3.37145800 | 4.99707000  |
| H | 6.55178000  | -6.53060000 | -6.19690000 |
| H | 7.85607900  | -6.03495800 | -5.09427000 |
| H | 6.40646700  | -6.83712500 | -4.45142000 |
| H | 7.60635900  | -5.59229700 | 5.61937700  |
| H | 8.18843600  | -5.82549200 | 3.95516700  |
| H | 8.87974700  | -4.53735300 | 4.96537100  |
| C | 10.92592100 | 0.17518500  | -1.22491800 |
| C | 11.05684500 | -1.03982700 | -1.92227400 |
| C | 12.06572700 | 0.74284600  | -0.62886800 |
| C | 12.28907700 | -1.67952500 | -2.04029200 |
| H | 10.17904900 | -1.48175800 | -2.39979600 |
| C | 13.29463400 | 0.10555100  | -0.73800900 |
| H | 11.97754500 | 1.67554400  | -0.06533800 |
| C | 13.40937100 | -1.09859000 | -1.44704500 |
| H | 12.37092000 | -2.61757500 | -2.59463100 |

|   |             |             |             |
|---|-------------|-------------|-------------|
| C | 14.63698800 | 0.54207100  | -0.15572300 |
| C | 14.81259400 | -1.52307400 | -1.40488200 |
| C | 15.54743000 | -0.57524300 | -0.66799200 |
| C | 14.49569300 | 0.51250300  | 1.39055400  |
| C | 14.98799500 | 1.95169500  | -0.70765600 |
| C | 15.43489400 | -2.64387500 | -1.95139000 |
| C | 16.91190200 | -0.76732200 | -0.47693600 |
| C | 15.67037000 | 0.98067000  | 2.24392100  |
| H | 14.23509800 | -0.52137200 | 1.67777300  |
| H | 13.61869500 | 1.13014400  | 1.64990200  |
| C | 16.45472900 | 2.37863100  | -0.74078100 |
| H | 14.40769500 | 2.68387300  | -0.11903500 |
| H | 14.59933600 | 2.02155000  | -1.73749800 |
| C | 16.80399800 | -2.81813500 | -1.76136700 |
| H | 14.86241900 | -3.37280000 | -2.53011200 |
| C | 17.55907100 | -1.88972000 | -1.02480500 |
| H | 17.49372100 | -0.05669300 | 0.11003000  |
| C | 15.41412000 | 0.77283000  | 3.73485600  |
| H | 16.59143700 | 0.44416500  | 1.96497300  |
| H | 15.86258100 | 2.05083200  | 2.06271200  |
| C | 16.62157900 | 3.84443500  | -1.13176200 |
| H | 16.93824300 | 2.21192000  | 0.23376700  |
| H | 17.00259500 | 1.75334300  | -1.46466300 |
| H | 17.29895700 | -3.68269400 | -2.20983300 |
| C | 16.56300200 | 1.24732500  | 4.61951800  |
| H | 14.48695900 | 1.29992300  | 4.02405000  |
| H | 15.22606200 | -0.29914100 | 3.92523300  |
| C | 18.07992600 | 4.28762700  | -1.20084200 |
| H | 16.13753600 | 4.01969800  | -2.10968400 |
| H | 16.08110300 | 4.48018400  | -0.40743800 |
| H | 17.49029400 | 0.72402300  | 4.32312900  |
| H | 16.74825700 | 2.32075200  | 4.43289900  |
| C | 16.31950300 | 1.03101500  | 6.11095100  |
| H | 18.55830500 | 4.11588600  | -0.21925500 |
| H | 18.62330600 | 3.64571100  | -1.91792200 |
| C | 18.26171300 | 5.75037900  | -1.59766100 |
| C | 17.47379300 | 1.50495700  | 6.98566100  |
| H | 16.13320700 | -0.04171000 | 6.29476700  |

|   |              |             |             |
|---|--------------|-------------|-------------|
| H | 15.39319200  | 1.55461000  | 6.40603100  |
| C | 19.72155200  | 6.18453700  | -1.64672800 |
| H | 17.70975800  | 6.38961900  | -0.88634400 |
| H | 17.79247000  | 5.91875200  | -2.58299500 |
| H | 17.26892500  | 1.33552100  | 8.05419900  |
| H | 18.40709400  | 0.97356200  | 6.73706000  |
| H | 17.66076600  | 2.58257500  | 6.84833900  |
| H | 19.82102000  | 7.24241600  | -1.93565500 |
| H | 20.20718400  | 6.06073300  | -0.66481000 |
| H | 20.29211900  | 5.58456300  | -2.37449500 |
| C | -10.94670100 | 0.20732600  | 0.98785300  |
| C | -11.06947700 | -0.90076100 | 1.84676300  |
| C | -12.09284700 | 0.68003700  | 0.32432700  |
| C | -12.29570300 | -1.53118500 | 2.04804400  |
| H | -10.19096200 | -1.26643800 | 2.38351800  |
| C | -13.31754100 | 0.05737000  | 0.52403000  |
| H | -12.01420000 | 1.52662000  | -0.36282700 |
| C | -13.42120500 | -1.04584700 | 1.38318700  |
| H | -12.36857100 | -2.38521900 | 2.72577600  |
| C | -14.66856500 | 0.42011100  | -0.08749300 |
| C | -14.82058400 | -1.48572100 | 1.39644600  |
| C | -15.56531400 | -0.64095600 | 0.55199500  |
| C | -14.55211700 | 0.24616500  | -1.62558100 |
| C | -15.02362900 | 1.87610000  | 0.32892300  |
| C | -15.43251600 | -2.54065300 | 2.07134000  |
| C | -16.92752700 | -0.86701600 | 0.38641900  |
| C | -15.73060100 | 0.66977500  | -2.49676900 |
| H | -14.31828200 | -0.81422100 | -1.82524600 |
| H | -13.66763500 | 0.81997100  | -1.95133100 |
| C | -16.49559500 | 2.28619800  | 0.35943700  |
| H | -14.46818600 | 2.55084000  | -0.34595400 |
| H | -14.60958500 | 2.05406400  | 1.33538100  |
| C | -16.79981300 | -2.74983400 | 1.90385600  |
| H | -14.85245900 | -3.19204500 | 2.72953600  |
| C | -17.56451700 | -1.92153500 | 1.06484300  |
| H | -17.51584900 | -0.23529200 | -0.27899100 |
| C | -15.48982900 | 0.37898900  | -3.97619100 |
| H | -16.65278900 | 0.15741900  | -2.17870300 |

|   |              |             |             |
|---|--------------|-------------|-------------|
| H | -15.91391800 | 1.74993700  | -2.37582800 |
| C | -16.67330000 | 3.78802800  | 0.56493900  |
| H | -17.00992200 | 1.99057000  | -0.56747500 |
| H | -17.00698400 | 1.75196100  | 1.17719100  |
| H | -17.28617200 | -3.56201600 | 2.44954100  |
| C | -16.64626000 | 0.81452400  | -4.87132400 |
| H | -14.56379100 | 0.88613900  | -4.30218400 |
| H | -15.30870600 | -0.70224800 | -4.11306800 |
| C | -18.13514100 | 4.21355600  | 0.66470800  |
| H | -16.13709800 | 4.09976200  | 1.47956700  |
| H | -16.19139500 | 4.32915900  | -0.26945700 |
| H | -17.56975800 | 0.30033300  | -4.54847400 |
| H | -16.83349400 | 1.89366200  | -4.72353600 |
| C | -16.41294100 | 0.54469100  | -6.35552700 |
| H | -18.67044000 | 3.89095000  | -0.24696400 |
| H | -18.61454800 | 3.67634200  | 1.50332800  |
| C | -18.32826600 | 5.71578700  | 0.85529900  |
| C | -17.57608400 | 0.98355300  | -7.23697200 |
| H | -16.22410300 | -0.53315000 | -6.50315600 |
| H | -15.49119100 | 1.06098000  | -6.67652800 |
| C | -19.79228000 | 6.12744400  | 0.95216400  |
| H | -17.84851900 | 6.25112700  | 0.01704600  |
| H | -17.79325800 | 6.03650600  | 1.76643600  |
| H | -17.37711700 | 0.78259000  | -8.30116500 |
| H | -18.50430200 | 0.45450200  | -6.96551000 |
| H | -17.76880500 | 2.06380600  | -7.13192000 |
| H | -19.89985500 | 7.21427200  | 1.09250400  |
| H | -20.34496100 | 5.85288200  | 0.03868600  |
| H | -20.29001700 | 5.63144400  | 1.80161700  |
| C | 19.02093100  | -2.07771000 | -0.82783400 |
| C | 19.89725700  | -0.97729300 | -0.80163100 |
| C | 19.57905900  | -3.35004600 | -0.65887200 |
| C | 21.26147000  | -1.14406400 | -0.61540300 |
| H | 19.50600800  | 0.03259800  | -0.94894500 |
| C | 20.94927800  | -3.53533700 | -0.46944000 |
| H | 18.93089300  | -4.23010200 | -0.65462900 |
| C | 21.80478500  | -2.42711200 | -0.44534800 |
| H | 21.93470700  | -0.28411800 | -0.60568500 |



|   |              |             |             |
|---|--------------|-------------|-------------|
| H | 21.33408700  | -4.54656200 | -0.33385400 |
| C | -19.02573800 | -2.14091500 | 0.89872900  |
| C | -19.90749500 | -1.06345700 | 0.75129600  |
| C | -19.57682800 | -3.43484800 | 0.88375700  |
| C | -21.28131600 | -1.24986200 | 0.59285800  |
| H | -19.52349900 | -0.04044000 | 0.77851000  |
| C | -20.94007200 | -3.63778200 | 0.72721500  |
| H | -18.92211000 | -4.30493100 | 0.97666300  |
| C | -21.81049400 | -2.54617900 | 0.58012700  |
| H | -21.92542200 | -0.37600400 | 0.49000400  |
| H | -21.35751600 | -4.64679700 | 0.70705200  |
| O | -23.11683800 | -2.83521500 | 0.43487600  |
| O | 23.13711000  | -2.49752800 | -0.26793300 |
| C | 23.73498300  | -3.76093800 | -0.09311100 |
| H | 24.81031200  | -3.58431000 | 0.03443900  |
| H | 23.35040800  | -4.27369800 | 0.80477000  |
| H | 23.58236400  | -4.41040100 | -0.97169700 |
| C | -24.03458500 | -1.78030700 | 0.26489000  |
| H | -23.81849400 | -1.19461100 | -0.64472400 |
| H | -25.02513200 | -2.24079300 | 0.16181900  |
| H | -24.04543600 | -1.10254200 | 1.13522700  |

[PC2]<sup>+</sup>

|   |            |             |             |
|---|------------|-------------|-------------|
| C | 3.70124000 | -3.03714500 | -1.67687400 |
| C | 2.95355500 | -1.92790500 | -1.24144600 |
| C | 3.62709700 | -0.76021200 | -0.84232500 |
| C | 5.01366200 | -0.71294600 | -0.88789900 |
| C | 5.74466900 | -1.82326100 | -1.33327800 |
| C | 5.09220500 | -2.99050200 | -1.72924100 |
| H | 3.18395000 | -3.94432700 | -1.99243500 |
| H | 3.05664100 | 0.10030500  | -0.48294600 |
| H | 5.65700300 | -3.85756500 | -2.07973700 |
| C | 5.93148600 | 0.44442100  | -0.50095800 |
| C | 7.30088300 | -0.16676800 | -0.80081500 |
| C | 8.56941500 | 0.38513700  | -0.65444900 |
| C | 9.71321300 | -0.35669300 | -0.99873700 |
| C | 9.55564400 | -1.66825700 | -1.47906600 |
| C | 8.29240800 | -2.23776900 | -1.61809400 |
| C | 7.17015500 | -1.48334800 | -1.28050300 |

|   |             |             |             |
|---|-------------|-------------|-------------|
| H | 8.69080000  | 1.39554500  | -0.26480100 |
| H | 10.43576000 | -2.24601100 | -1.77076700 |
| H | 8.18626100  | -3.25608000 | -1.99963200 |
| C | 1.47120900  | -1.96206000 | -1.23124200 |
| C | 0.73374000  | -3.11265100 | -0.77955700 |
| C | 0.71285500  | -0.89192500 | -1.64069100 |
| C | -0.71577900 | -3.12351400 | -0.79052400 |
| C | -0.71443400 | -0.90249600 | -1.65091500 |
| H | 1.21440900  | 0.00648600  | -2.00738600 |
| C | -1.46295400 | -1.98368600 | -1.25237200 |
| H | -1.22356200 | -0.01124300 | -2.02457600 |
| N | 1.25271100  | -4.23611600 | -0.28724700 |
| N | -1.22567600 | -4.25461000 | -0.30622800 |
| S | 0.01765400  | -5.20811200 | 0.11708300  |
| C | 5.72120600  | 0.71644300  | 1.01249100  |
| C | 6.46819900  | 1.87796700  | 1.66035800  |
| H | 5.96730700  | -0.21387100 | 1.55382500  |
| H | 4.64057500  | 0.87997700  | 1.16508400  |
| C | 6.20460000  | 1.96513400  | 3.16183300  |
| H | 7.55312200  | 1.77992400  | 1.49491700  |
| H | 6.16329700  | 2.82812300  | 1.19268500  |
| C | 6.95019500  | 3.10973400  | 3.84152200  |
| H | 5.11950400  | 2.08078300  | 3.33577800  |
| H | 6.48892500  | 1.01034300  | 3.63950000  |
| H | 8.03586600  | 2.98157700  | 3.67937300  |
| H | 6.68163800  | 4.06299400  | 3.35104900  |
| C | 6.67549400  | 3.22055100  | 5.33898300  |
| C | 7.44074200  | 4.35476100  | 6.00997800  |
| H | 6.93155200  | 2.26344300  | 5.82637600  |
| H | 5.59202400  | 3.36157700  | 5.49862700  |
| H | 7.21944700  | 4.41292400  | 7.08705000  |
| H | 8.52915400  | 4.21935000  | 5.89987300  |
| H | 7.18279000  | 5.32878600  | 5.56296300  |
| C | 5.58532500  | 1.67013400  | -1.39418700 |
| C | 6.66062800  | 2.73094400  | -1.62320100 |
| H | 4.68706800  | 2.14446100  | -0.96146500 |
| H | 5.27816900  | 1.29280400  | -2.38401000 |
| C | 6.13622300  | 3.93691500  | -2.39803100 |

|   |             |             |             |
|---|-------------|-------------|-------------|
| H | 7.08725900  | 3.07654100  | -0.66915300 |
| H | 7.49651300  | 2.28738900  | -2.18826800 |
| C | 7.20693800  | 4.99338600  | -2.65371400 |
| H | 5.71645500  | 3.59773200  | -3.36242100 |
| H | 5.29593500  | 4.39447800  | -1.84515000 |
| H | 7.60636700  | 5.34744500  | -1.68576600 |
| H | 8.06009800  | 4.52631300  | -3.17889100 |
| C | 6.71536900  | 6.19075200  | -3.46290900 |
| C | 7.79222800  | 7.24320300  | -3.69661900 |
| H | 5.85588300  | 6.65131900  | -2.94454200 |
| H | 6.32809200  | 5.83572000  | -4.43422200 |
| H | 7.40923900  | 8.09065300  | -4.28615300 |
| H | 8.17145200  | 7.64510800  | -2.74266200 |
| H | 8.65211300  | 6.81948500  | -4.24083700 |
| C | -2.94541400 | -1.96854600 | -1.28151100 |
| C | -3.67646300 | -3.08640100 | -1.72409300 |
| C | -3.63544300 | -0.80718500 | -0.89403400 |
| C | -5.06712500 | -3.05454800 | -1.79260600 |
| H | -3.14592900 | -3.98873300 | -2.03154700 |
| C | -5.02151500 | -0.77360400 | -0.95841700 |
| H | -3.07837200 | 0.05900400  | -0.52779300 |
| C | -5.73624100 | -1.89283900 | -1.40732200 |
| H | -5.61865100 | -3.92829100 | -2.14747300 |
| C | -5.95365600 | 0.37178800  | -0.57299500 |
| C | -7.16571500 | -1.56805800 | -1.36676600 |
| C | -7.31337600 | -0.25414000 | -0.88274500 |
| C | -5.63300900 | 1.56922300  | -1.50698200 |
| C | -5.73958800 | 0.69232300  | 0.93335600  |
| C | -8.27644900 | -2.33057200 | -1.72570000 |
| C | -8.58588400 | 0.29378700  | -0.77167700 |
| C | -6.35355600 | 2.89392800  | -1.27468000 |
| H | -5.81799100 | 1.23735600  | -2.54364900 |
| H | -4.54781600 | 1.75553100  | -1.43649100 |
| C | -6.86371100 | 1.39261400  | 1.69489000  |
| H | -4.81468100 | 1.29059700  | 1.00969300  |
| H | -5.52737200 | -0.25618300 | 1.45457400  |
| C | -9.54646200 | -1.77362900 | -1.60153100 |
| H | -8.15589600 | -3.34654100 | -2.10865700 |

|   |              |             |             |
|---|--------------|-------------|-------------|
| C | -9.71763300  | -0.46079900 | -1.12982700 |
| H | -8.72129500  | 1.30127100  | -0.37949000 |
| C | -6.06811600  | 3.90812900  | -2.37962000 |
| H | -7.44260400  | 2.73926900  | -1.21370900 |
| H | -6.04392500  | 3.32282600  | -0.30760600 |
| C | -6.45351900  | 1.77700100  | 3.11417700  |
| H | -7.20076800  | 2.29503600  | 1.16277200  |
| H | -7.73864500  | 0.72459600  | 1.75031400  |
| H | -10.41861500 | -2.36030900 | -1.89894100 |
| C | -6.73135200  | 5.26143400  | -2.14213600 |
| H | -4.97657100  | 4.04760800  | -2.48024000 |
| H | -6.41215600  | 3.49691300  | -3.34583300 |
| C | -7.57138800  | 2.46247800  | 3.89448600  |
| H | -6.12597000  | 0.87265500  | 3.65818900  |
| H | -5.57358700  | 2.44429900  | 3.07530000  |
| H | -7.81847900  | 5.11406300  | -2.00710400 |
| H | -6.36324700  | 5.68523000  | -1.19006800 |
| C | -6.49753200  | 6.26898100  | -3.26472100 |
| H | -7.87609600  | 3.38053200  | 3.35977500  |
| H | -8.46248800  | 1.80856500  | 3.90416600  |
| C | -7.19608300  | 2.81813400  | 5.33082200  |
| C | -7.15637400  | 7.61920500  | -3.00975700 |
| H | -6.87529700  | 5.84693100  | -4.21265900 |
| H | -5.41155300  | 6.40925900  | -3.40662600 |
| C | -8.31336200  | 3.52878300  | 6.08518200  |
| H | -6.29300600  | 3.45376900  | 5.32367700  |
| H | -6.91404200  | 1.89637400  | 5.86933800  |
| H | -6.97634200  | 8.32179100  | -3.83824400 |
| H | -8.24732600  | 7.51388000  | -2.89180000 |
| H | -6.76794000  | 8.08388100  | -2.08871000 |
| H | -8.02130900  | 3.75827300  | 7.12179800  |
| H | -8.58198700  | 4.47920500  | 5.59573100  |
| H | -9.22422900  | 2.90897800  | 6.12530400  |
| C | -11.07297800 | 0.13056500  | -1.00487600 |
| C | -11.27531100 | 1.50461300  | -1.27112200 |
| C | -12.16600600 | -0.66483500 | -0.61724300 |
| C | -12.52888900 | 2.08307500  | -1.16179800 |
| H | -10.43092700 | 2.11907400  | -1.58998700 |

|   |              |             |             |
|---|--------------|-------------|-------------|
| C | -13.42337600 | -0.09341500 | -0.49944500 |
| H | -12.01757700 | -1.72271300 | -0.38904800 |
| C | -13.60786000 | 1.27539100  | -0.77466000 |
| H | -12.67424000 | 3.14313900  | -1.37948200 |
| C | -14.72606500 | -0.76236000 | -0.07623700 |
| C | -14.99958200 | 1.59324000  | -0.58604100 |
| C | -15.69317400 | 0.41272500  | -0.19352300 |
| C | -14.55052200 | -1.21527100 | 1.39958600  |
| C | -15.02882400 | -1.93754000 | -1.04620600 |
| C | -15.67385900 | 2.82061800  | -0.73026800 |
| C | -17.04363000 | 0.47095000  | 0.04275700  |
| C | -15.68428200 | -1.98683800 | 2.06673900  |
| H | -14.32712500 | -0.31451400 | 1.99742500  |
| H | -13.64175200 | -1.83937600 | 1.43701700  |
| C | -16.47824300 | -2.39578500 | -1.20254300 |
| H | -14.40800400 | -2.78945400 | -0.71929800 |
| H | -14.65744600 | -1.66056600 | -2.04663700 |
| C | -17.02469800 | 2.87045000  | -0.48425000 |
| H | -15.13241100 | 3.71694700  | -1.03754700 |
| C | -17.75655400 | 1.70185200  | -0.09804700 |
| H | -17.57628300 | -0.42137500 | 0.36067000  |
| C | -15.40415000 | -2.24556900 | 3.54534000  |
| H | -16.63527300 | -1.43703800 | 1.97884700  |
| H | -15.83143000 | -2.95326100 | 1.55782900  |
| C | -16.58943500 | -3.68377100 | -2.01363300 |
| H | -16.95306500 | -2.55018900 | -0.22159800 |
| H | -17.06000800 | -1.60619600 | -1.70652900 |
| H | -17.54154300 | 3.82005700  | -0.61750200 |
| C | -16.50930700 | -3.03318800 | 4.24216200  |
| H | -14.44645400 | -2.78683400 | 3.64769200  |
| H | -15.26322700 | -1.27914800 | 4.06190300  |
| C | -18.03088600 | -4.12913100 | -2.24127400 |
| H | -16.08944500 | -3.54710400 | -2.98948000 |
| H | -16.03554000 | -4.48856200 | -1.49747700 |
| H | -17.46831500 | -2.49636600 | 4.12537800  |
| H | -16.64283400 | -4.00465800 | 3.73248300  |
| C | -16.24758400 | -3.27614300 | 5.72635600  |
| H | -18.53118500 | -4.25339600 | -1.26352000 |

|   |              |             |             |
|---|--------------|-------------|-------------|
| H | -18.58196200 | -3.32616500 | -2.76399700 |
| C | -18.15551600 | -5.42579600 | -3.03700000 |
| C | -17.35949600 | -4.05841300 | 6.41453400  |
| H | -16.11208900 | -2.30417400 | 6.23256900  |
| H | -15.29013600 | -3.81369600 | 5.84223700  |
| C | -19.59908100 | -5.86121200 | -3.25780700 |
| H | -17.60499000 | -6.22668500 | -2.51269800 |
| H | -17.65410400 | -5.30126700 | -4.01291200 |
| H | -17.14338300 | -4.21694800 | 7.48247500  |
| H | -18.32288300 | -3.52723100 | 6.34448300  |
| H | -17.49509100 | -5.04943300 | 5.95106100  |
| H | -19.65553600 | -6.80122100 | -3.82847500 |
| H | -20.11707700 | -6.02253100 | -2.29821900 |
| H | -20.16562700 | -5.09749200 | -3.81543100 |
| C | 11.06717200  | 0.24856100  | -0.87881300 |
| C | 11.26660300  | 1.61511200  | -1.14880400 |
| C | 12.17420600  | -0.53923000 | -0.51693700 |
| C | 12.53229800  | 2.19326900  | -1.07232400 |
| H | 10.41806700  | 2.23437500  | -1.44983900 |
| C | 13.43767800  | 0.03089200  | -0.44412900 |
| H | 12.03532100  | -1.59835000 | -0.28499900 |
| C | 13.61960700  | 1.39295900  | -0.72294100 |
| H | 12.66649300  | 3.25421900  | -1.29641800 |
| C | 14.75563500  | -0.64673700 | -0.07691700 |
| C | 15.04695500  | 1.70119900  | -0.58489300 |
| C | 15.72711700  | 0.52583900  | -0.21515500 |
| C | 15.01346000  | -1.76396800 | -1.12273800 |
| C | 14.64520900  | -1.18898500 | 1.37726700  |
| C | 15.73785700  | 2.89613400  | -0.77728100 |
| C | 17.10827600  | 0.55568500  | -0.05330400 |
| C | 16.18744700  | -2.71418400 | -0.90851100 |
| H | 15.11357400  | -1.28102300 | -2.11055400 |
| H | 14.09601400  | -2.37483600 | -1.17479000 |
| C | 15.93572000  | -1.38930000 | 2.17037700  |
| H | 14.09142800  | -2.14311300 | 1.32933100  |
| H | 14.00547800  | -0.49906100 | 1.95259000  |
| C | 17.11946700  | 2.91531300  | -0.59854200 |
| H | 15.20697700  | 3.80923500  | -1.05732900 |

|   |              |             |             |
|---|--------------|-------------|-------------|
| C | 17.82256300  | 1.75294100  | -0.23819500 |
| H | 17.65262900  | -0.35238400 | 0.20657800  |
| C | 16.32918800  | -3.71925900 | -2.04923000 |
| H | 17.13139700  | -2.15505900 | -0.80451400 |
| H | 16.04722400  | -3.26987000 | 0.03291200  |
| C | 15.70105700  | -2.07377100 | 3.51427600  |
| H | 16.66496600  | -1.97830800 | 1.59379100  |
| H | 16.40936700  | -0.41041600 | 2.35041400  |
| H | 17.65970900  | 3.85636600  | -0.72576100 |
| C | 17.44751300  | -4.73289000 | -1.82712000 |
| H | 15.37216100  | -4.25591400 | -2.18069700 |
| H | 16.50583700  | -3.17865600 | -2.99644700 |
| C | 16.98766700  | -2.27720200 | 4.30900100  |
| H | 14.98882400  | -1.47696500 | 4.11226900  |
| H | 15.21568700  | -3.05271300 | 3.34937800  |
| H | 18.40678900  | -4.19826100 | -1.70295500 |
| H | 17.27198900  | -5.26282000 | -0.87324400 |
| C | 17.58340700  | -5.75653300 | -2.95135900 |
| H | 17.68924000  | -2.88510200 | 3.70908900  |
| H | 17.48320000  | -1.30013200 | 4.45562300  |
| C | 16.78149400  | -2.94390600 | 5.66668300  |
| C | 18.69101600  | -6.77488900 | -2.71019400 |
| H | 17.76759000  | -5.22836500 | -3.90339100 |
| H | 16.62054300  | -6.28194100 | -3.07855800 |
| C | 18.08186400  | -3.16147500 | 6.43105100  |
| H | 16.27279700  | -3.91305700 | 5.52102200  |
| H | 16.09492000  | -2.32768500 | 6.27335500  |
| H | 18.75853200  | -7.50331500 | -3.53311300 |
| H | 19.67286500  | -6.28226200 | -2.61819600 |
| H | 18.51668400  | -7.33854100 | -1.77901300 |
| H | 17.90458900  | -3.64180200 | 7.40589200  |
| H | 18.77375000  | -3.80458000 | 5.86286800  |
| H | 18.59770900  | -2.20548400 | 6.61868400  |
| C | -19.17684500 | 1.75638300  | 0.13565900  |
| C | -19.96238700 | 0.56708200  | 0.24581800  |
| C | -19.86396000 | 2.99832700  | 0.26831600  |
| C | -21.31240300 | 0.61966600  | 0.46609200  |
| H | -19.49950600 | -0.41210700 | 0.12701300  |

|   |              |             |             |
|---|--------------|-------------|-------------|
| C | -21.21752000 | 3.06510700  | 0.50314100  |
| H | -19.31368500 | 3.93696200  | 0.21282100  |
| C | -21.96740800 | 1.87028000  | 0.60488400  |
| H | -21.90891900 | -0.29141300 | 0.53399200  |
| H | -21.69489600 | 4.03823400  | 0.61365000  |
| C | 19.29652500  | 1.78245000  | -0.04367200 |
| C | 19.91343100  | 1.00982000  | 0.94751900  |
| C | 20.12446000  | 2.58762100  | -0.84633600 |
| C | 21.29514800  | 1.02635400  | 1.14280100  |
| H | 19.30387600  | 0.38488200  | 1.60542900  |
| C | 21.49946900  | 2.61495100  | -0.66631400 |
| H | 19.68616500  | 3.19261600  | -1.64380500 |
| C | 22.10232100  | 1.83346600  | 0.33188500  |
| H | 21.72626900  | 0.41206900  | 1.93394700  |
| H | 22.13487700  | 3.23637600  | -1.30106300 |
| O | 23.44118500  | 1.92060500  | 0.43596800  |
| O | -23.26413900 | 1.82433400  | 0.82423400  |
| C | -24.01645900 | 3.02391700  | 0.97266500  |
| H | -25.05308100 | 2.71199600  | 1.14006400  |
| H | -23.66300500 | 3.60287500  | 1.83879500  |
| H | -23.96016000 | 3.63673400  | 0.06051600  |
| C | 24.10207300  | 1.14385300  | 1.40736700  |
| H | 23.93576400  | 0.06478000  | 1.24946700  |
| H | 25.17347400  | 1.35528200  | 1.30155900  |
| H | 23.78604500  | 1.41077200  | 2.43011100  |

**[PC3]**

|   |             |             |             |
|---|-------------|-------------|-------------|
| C | 4.32978500  | -1.16800700 | -2.17400400 |
| C | 4.73019700  | -0.71051100 | -0.90639400 |
| C | 3.75914500  | -0.23525700 | -0.00769300 |
| C | 2.42137300  | -0.21530500 | -0.38028900 |
| C | 2.03447400  | -0.70873700 | -1.63822500 |
| C | 2.98609200  | -1.18052900 | -2.54114700 |
| H | 5.07985700  | -1.54059800 | -2.87335100 |
| H | 4.06422200  | 0.12211500  | 0.97810400  |
| H | 2.68740200  | -1.56748100 | -3.51822800 |
| C | 1.21278200  | 0.25887700  | 0.41770800  |
| C | 0.07809700  | -0.11069400 | -0.52981400 |
| C | -1.28723600 | 0.03969200  | -0.33375600 |



|   |              |             |             |
|---|--------------|-------------|-------------|
| C | -2.18519800  | -0.35163400 | -1.34251000 |
| C | -1.67597700  | -0.88495000 | -2.54042000 |
| C | -0.30537100  | -1.03424200 | -2.74277700 |
| C | 0.57054600   | -0.64600200 | -1.72994300 |
| H | -1.66473100  | 0.43760500  | 0.61191100  |
| H | -2.36596000  | -1.17315400 | -3.33669800 |
| H | 0.07052700   | -1.44722800 | -3.68182500 |
| C | 6.15478800   | -0.75313300 | -0.49327200 |
| C | 7.21485900   | -0.34770300 | -1.38098800 |
| C | 6.53860900   | -1.16612600 | 0.76030900  |
| C | 8.59620200   | -0.39427000 | -0.94995600 |
| C | 7.90590300   | -1.21029200 | 1.18394200  |
| H | 5.77374300   | -1.49577000 | 1.46723900  |
| C | 8.93245800   | -0.84106100 | 0.36275100  |
| H | 8.11982500   | -1.55960100 | 2.19646100  |
| N | 7.07908600   | 0.11242800  | -2.62387000 |
| N | 9.44837100   | 0.02440600  | -1.88512500 |
| S | 8.56730700   | 0.44132400  | -3.18521500 |
| H | 9.97642400   | -0.87727100 | 0.67683000  |
| C | -3.65124400  | -0.20057900 | -1.14752800 |
| C | -4.17902900  | 0.90398300  | -0.46245800 |
| C | -4.55079900  | -1.15745400 | -1.64491800 |
| C | -5.55051800  | 1.05155200  | -0.28205700 |
| H | -3.50922900  | 1.67621900  | -0.07779500 |
| C | -5.92049200  | -1.01405400 | -1.46660800 |
| H | -4.17240000  | -2.04021100 | -2.16520300 |
| C | -6.44159700  | 0.09409100  | -0.78403400 |
| H | -5.91287900  | 1.93124000  | 0.25443000  |
| H | -6.60680300  | -1.76916700 | -1.85364300 |
| C | -7.90040200  | 0.21080100  | -0.61950400 |
| C | -10.00474100 | -0.19639000 | -0.67952900 |
| C | -9.85955100  | 1.06307600  | -0.05535100 |
| C | -11.28521400 | -0.74069300 | -0.86457200 |
| C | -10.95298300 | 1.80988200  | 0.39395500  |
| C | -12.37570600 | -0.00429600 | -0.42008200 |
| H | -11.41081000 | -1.71344800 | -1.34506000 |
| C | -12.21148000 | 1.25297000  | 0.19996600  |
| H | -10.82269700 | 2.78167400  | 0.87378200  |

|   |              |             |             |
|---|--------------|-------------|-------------|
| H | -13.38411200 | -0.40412200 | -0.55117900 |
| H | -13.09556200 | 1.80043300  | 0.53545400  |
| N | -8.76608800  | -0.69578700 | -1.01692300 |
| N | -8.50509400  | 1.28848300  | -0.03395700 |
| H | -8.04815000  | 2.11190500  | 0.34207200  |
| C | 1.19288300   | 1.80115500  | 0.59281500  |
| C | 2.32434700   | 2.43752300  | 1.39430300  |
| H | 0.23076200   | 2.05806400  | 1.06910400  |
| H | 1.16914000   | 2.25923400  | -0.41088700 |
| C | 2.11495000   | 3.93678600  | 1.59417700  |
| H | 2.41771600   | 1.95429100  | 2.38121300  |
| H | 3.28527900   | 2.27902600  | 0.87819500  |
| C | 3.24766600   | 4.61396100  | 2.35964100  |
| H | 1.99936800   | 4.42292000  | 0.60857200  |
| H | 1.16190100   | 4.10415100  | 2.12759900  |
| H | 3.36859300   | 4.12281800  | 3.34242500  |
| H | 4.19967000   | 4.45241100  | 1.82214000  |
| C | 3.03630300   | 6.11120300  | 2.56934400  |
| C | 4.17294300   | 6.78118000  | 3.33164500  |
| H | 2.08560400   | 6.27007700  | 3.10802900  |
| H | 2.91230300   | 6.59972800  | 1.58679100  |
| H | 3.98889300   | 7.85782700  | 3.47072700  |
| H | 4.30076500   | 6.33301000  | 4.33076200  |
| H | 5.13080900   | 6.67244100  | 2.79706400  |
| C | 1.08993000   | -0.45547500 | 1.77872900  |
| C | 0.99674700   | -1.97660200 | 1.70874500  |
| H | 0.19892500   | -0.05506800 | 2.29320500  |
| H | 1.95502500   | -0.17759400 | 2.40323100  |
| C | 0.83491000   | -2.62413200 | 3.08088200  |
| H | 0.14528700   | -2.26935400 | 1.07041300  |
| H | 1.90022800   | -2.38196000 | 1.22098500  |
| C | 0.74172200   | -4.14617100 | 3.02765200  |
| H | 1.68280800   | -2.33202200 | 3.72661400  |
| H | -0.07085300  | -2.22044800 | 3.56818100  |
| H | -0.09769400  | -4.43650000 | 2.36989800  |
| H | 1.65299300   | -4.55115900 | 2.55126000  |
| C | 0.55651700   | -4.79882100 | 4.39515800  |
| C | 0.46067800   | -6.31828900 | 4.33002900  |

|        |             |             |             |
|--------|-------------|-------------|-------------|
| H      | -0.35378000 | -4.39149300 | 4.86914200  |
| H      | 1.39571700  | -4.50904800 | 5.05183600  |
| H      | 0.32636500  | -6.75982400 | 5.32985100  |
| H      | -0.39151300 | -6.63743800 | 3.70772900  |
| H      | 1.37197500  | -6.75706800 | 3.89164500  |
| [PC3]* |             |             |             |
| C      | 4.11466300  | -1.66587800 | -2.74366700 |
| C      | 4.66026700  | -1.08890500 | -1.55983300 |
| C      | 3.75672100  | -0.50470200 | -0.62786100 |
| C      | 2.40487800  | -0.46236400 | -0.89806900 |
| C      | 1.89415800  | -1.04149700 | -2.07891700 |
| C      | 2.75437600  | -1.64391700 | -3.00344700 |
| H      | 4.77462700  | -2.11159800 | -3.48799700 |
| H      | 4.14499500  | -0.10974000 | 0.30773100  |
| H      | 2.36405700  | -2.09097600 | -3.92017500 |
| C      | 1.28524700  | 0.13664500  | -0.05559300 |
| C      | 0.06668700  | -0.24847700 | -0.88416500 |
| C      | -1.27126600 | -0.01618300 | -0.60069900 |
| C      | -2.26081700 | -0.45153500 | -1.49938600 |
| C      | -1.87132400 | -1.10861900 | -2.68242200 |
| C      | -0.53048200 | -1.34121000 | -2.97376300 |
| C      | 0.43897900  | -0.91121400 | -2.06583600 |
| H      | -1.55560700 | 0.47686700  | 0.33239000  |
| H      | -2.63339800 | -1.43043500 | -3.39551600 |
| H      | -0.24784600 | -1.85040000 | -3.89794300 |
| C      | -3.69952400 | -0.22821800 | -1.19970600 |
| C      | -4.13350400 | 0.94485100  | -0.56428300 |
| C      | -4.66519700 | -1.19018400 | -1.53768000 |
| C      | -5.47866000 | 1.15130200  | -0.27510800 |
| H      | -3.41237600 | 1.72283300  | -0.30469100 |
| C      | -6.00820200 | -0.98840300 | -1.24914700 |
| H      | -4.36002700 | -2.12349400 | -2.01582700 |
| C      | -6.43535300 | 0.18518800  | -0.61208700 |
| H      | -5.76888300 | 2.08390500  | 0.21375500  |
| H      | -6.74635500 | -1.74901400 | -1.50874800 |
| C      | -7.86875700 | 0.35348700  | -0.31902900 |
| C      | -9.98034000 | 0.00849800  | -0.18285200 |
| C      | -9.73916700 | 1.25562300  | 0.43666300  |

|   |              |             |             |
|---|--------------|-------------|-------------|
| C | -11.28781600 | -0.49750800 | -0.24948000 |
| C | -10.76206800 | 2.02488300  | 0.99992300  |
| C | -12.30818900 | 0.26148400  | 0.30826000  |
| H | -11.48601300 | -1.45981500 | -0.72652000 |
| C | -12.04865800 | 1.50463300  | 0.92418100  |
| H | -10.55935600 | 2.98574700  | 1.47660000  |
| H | -13.33566200 | -0.10851200 | 0.27150200  |
| H | -12.87973100 | 2.07013900  | 1.35230300  |
| N | -8.79509900  | -0.52233300 | -0.64091900 |
| N | -8.38259300  | 1.44242600  | 0.32925000  |
| H | -7.86538000  | 2.24187500  | 0.67766000  |
| C | 1.36948700   | 1.68720100  | -0.01652000 |
| C | 2.58074400   | 2.29709800  | 0.68192000  |
| H | 0.44880600   | 2.05494900  | 0.46880100  |
| H | 1.33599600   | 2.05391900  | -1.05701900 |
| C | 2.59866500   | 3.82193200  | 0.61765900  |
| H | 2.61440500   | 1.98050500  | 1.73789400  |
| H | 3.50779500   | 1.92507300  | 0.21914200  |
| C | 3.84583500   | 4.42601800  | 1.25682700  |
| H | 2.54147300   | 4.14040600  | -0.43891000 |
| H | 1.69614600   | 4.22923300  | 1.10786200  |
| H | 3.88936500   | 4.13403700  | 2.32201700  |
| H | 4.74206300   | 3.98158800  | 0.78658000  |
| C | 3.92455400   | 5.94618000  | 1.14659700  |
| C | 5.18360400   | 6.53051800  | 1.77528000  |
| H | 3.03247500   | 6.39251700  | 1.62017300  |
| H | 3.87745500   | 6.23247800  | 0.08109500  |
| H | 5.22186300   | 7.62537200  | 1.66386300  |
| H | 5.23566100   | 6.30275900  | 2.85259500  |
| H | 6.09102800   | 6.11576700  | 1.30635100  |
| C | 1.23410100   | -0.45789400 | 1.36569800  |
| C | 1.05194400   | -1.97120800 | 1.42672000  |
| H | 0.41266900   | 0.03699000  | 1.91280900  |
| H | 2.16253800   | -0.18669400 | 1.89437200  |
| C | 0.98564500   | -2.50717400 | 2.85388700  |
| H | 0.12960000   | -2.25844200 | 0.89298500  |
| H | 1.88296400   | -2.46484900 | 0.89308500  |
| C | 0.81498800   | -4.02173000 | 2.92331100  |

|   |             |             |             |
|---|-------------|-------------|-------------|
| H | 1.90262400  | -2.21719900 | 3.39797200  |
| H | 0.14859500  | -2.02063700 | 3.38654000  |
| H | -0.09100600 | -4.31155700 | 2.36039300  |
| H | 1.66180200  | -4.50744200 | 2.40506300  |
| C | 0.71654900  | -4.56694600 | 4.34582600  |
| C | 0.55337500  | -6.08104300 | 4.40095000  |
| H | -0.13404100 | -4.08501700 | 4.85929500  |
| H | 1.61875800  | -4.27209400 | 4.91027000  |
| H | 0.47991000  | -6.44370500 | 5.43808400  |
| H | -0.35760200 | -6.40316400 | 3.87029100  |
| H | 1.40888200  | -6.59132900 | 3.92880600  |
| C | 6.08391200  | -1.08551600 | -1.32986300 |
| C | 6.74173700  | -0.18992500 | -0.41226800 |
| C | 6.95206100  | -2.02511200 | -2.05608500 |
| C | 8.19156300  | -0.26440300 | -0.23243900 |
| N | 6.18313700  | 0.76959200  | 0.30777600  |
| C | 8.29646200  | -2.08824700 | -1.86290900 |
| H | 6.48943100  | -2.73011600 | -2.74569000 |
| C | 8.95856500  | -1.20852800 | -0.94949300 |
| N | 8.67773700  | 0.62602800  | 0.62477000  |
| S | 7.39026500  | 1.53315200  | 1.18578900  |
| H | 8.88910200  | -2.82384700 | -2.40982400 |
| H | 10.03903900 | -1.25131600 | -0.80475500 |

[PC3]-

|   |             |             |             |
|---|-------------|-------------|-------------|
| C | 4.13334400  | -1.64737700 | -2.70909100 |
| C | 4.65427600  | -1.12335700 | -1.50707800 |
| C | 3.75085400  | -0.56938600 | -0.57887100 |
| C | 2.39401500  | -0.51301200 | -0.86461900 |
| C | 1.89551700  | -1.05821600 | -2.05984800 |
| C | 2.76766800  | -1.63103200 | -2.98592700 |
| H | 4.81844300  | -2.06395800 | -3.45131500 |
| H | 4.13422300  | -0.18179800 | 0.36382400  |
| H | 2.39197100  | -2.05327600 | -3.92153100 |
| C | 1.27140500  | 0.08223700  | -0.02258600 |
| C | 0.05520600  | -0.27282500 | -0.86891900 |
| C | -1.28231900 | -0.03260800 | -0.59193700 |
| C | -2.27138300 | -0.43889600 | -1.50613000 |
| C | -1.87692800 | -1.07536300 | -2.69633800 |

|   |              |             |             |
|---|--------------|-------------|-------------|
| C | -0.53316200  | -1.31452400 | -2.98119000 |
| C | 0.43436800   | -0.91469400 | -2.06004700 |
| H | -1.56899100  | 0.44526100  | 0.34866500  |
| H | -2.63518800  | -1.37703200 | -3.42263000 |
| H | -0.25022900  | -1.80871700 | -3.91373100 |
| C | -3.70968600  | -0.20505800 | -1.21174600 |
| C | -4.13417000  | 0.95863000  | -0.55258900 |
| C | -4.68609700  | -1.14624200 | -1.57707700 |
| C | -5.47821000  | 1.17508200  | -0.26547100 |
| H | -3.40502300  | 1.72156200  | -0.27155900 |
| C | -6.02842000  | -0.93434200 | -1.29175300 |
| H | -4.38982400  | -2.07241000 | -2.07444500 |
| C | -6.44503600  | 0.22886000  | -0.62911200 |
| H | -5.75934600  | 2.10054000  | 0.24203800  |
| H | -6.77408800  | -1.67988200 | -1.57289800 |
| C | -7.87720400  | 0.40748900  | -0.33663600 |
| C | -9.99391200  | 0.08720000  | -0.21513400 |
| C | -9.73763800  | 1.31295600  | 0.43996900  |
| C | -11.30798200 | -0.39876800 | -0.29861800 |
| C | -10.75130600 | 2.08005900  | 1.02229600  |
| C | -12.31947700 | 0.35811500  | 0.27818100  |
| H | -11.51820700 | -1.34491200 | -0.80213700 |
| C | -12.04475300 | 1.57980500  | 0.92923600  |
| H | -10.53657700 | 3.02471700  | 1.52540500  |
| H | -13.35179100 | 0.00334000  | 0.22881500  |
| H | -12.86919500 | 2.14442300  | 1.37118500  |
| N | -8.81450400  | -0.44629400 | -0.68545400 |
| N | -8.37840000  | 1.48425900  | 0.34127300  |
| H | -7.85185100  | 2.26637200  | 0.71410600  |
| C | 1.37355400   | 1.63087700  | 0.05597300  |
| C | 2.63626200   | 2.20100300  | 0.69404000  |
| H | 0.48768800   | 1.99254400  | 0.60745700  |
| H | 1.28229800   | 2.03213400  | -0.96824500 |
| C | 2.63396800   | 3.72358400  | 0.79623800  |
| H | 2.78069500   | 1.77658800  | 1.70200100  |
| H | 3.51760200   | 1.89822700  | 0.10852200  |
| C | 3.95377200   | 4.26824700  | 1.33627800  |
| H | 2.44097400   | 4.15943600  | -0.20070900 |

|   |             |             |             |
|---|-------------|-------------|-------------|
| H | 1.80181600  | 4.05675400  | 1.44259900  |
| H | 4.15494500  | 3.81594700  | 2.32455800  |
| H | 4.77552600  | 3.92944000  | 0.67924900  |
| C | 4.00384300  | 5.78816600  | 1.45943900  |
| C | 5.33715800  | 6.29963500  | 1.99213800  |
| H | 3.18703100  | 6.12695100  | 2.12088600  |
| H | 3.80309900  | 6.23968600  | 0.47196100  |
| H | 5.34941800  | 7.39778800  | 2.07289400  |
| H | 5.54833000  | 5.88858500  | 2.99296100  |
| H | 6.16865500  | 6.00281500  | 1.33190700  |
| C | 1.19516900  | -0.53836100 | 1.38692000  |
| C | 1.02093200  | -2.05347100 | 1.41993900  |
| H | 0.35930600  | -0.05905700 | 1.92637900  |
| H | 2.11049400  | -0.27215900 | 1.94065600  |
| C | 0.91361600  | -2.61070500 | 2.83648500  |
| H | 0.11752900  | -2.33822000 | 0.85301800  |
| H | 1.87139600  | -2.53387600 | 0.90570200  |
| C | 0.75156500  | -4.12716500 | 2.88071200  |
| H | 1.81149500  | -2.32229000 | 3.41255600  |
| H | 0.05737400  | -2.13722300 | 3.35016700  |
| H | -0.13747300 | -4.41538300 | 2.29041800  |
| H | 1.61485100  | -4.60007400 | 2.37821800  |
| C | 0.62021000  | -4.69251100 | 4.29266600  |
| C | 0.46313400  | -6.20795700 | 4.32321100  |
| H | -0.24510100 | -4.22159100 | 4.79156300  |
| H | 1.50674900  | -4.40125100 | 4.88328700  |
| H | 0.36804200  | -6.58554900 | 5.35326300  |
| H | -0.43414500 | -6.52684200 | 3.76772400  |
| H | 1.33147200  | -6.70770500 | 3.86347900  |
| C | 6.10954300  | -1.15556700 | -1.23091800 |
| C | 6.76422200  | -0.10063900 | -0.52203400 |
| C | 6.90351600  | -2.22681600 | -1.68652700 |
| C | 8.20704000  | -0.15970500 | -0.30505900 |
| N | 6.19631500  | 1.01036800  | -0.02172600 |
| C | 8.28284400  | -2.28358000 | -1.46472900 |
| H | 6.41960100  | -3.05697400 | -2.20787200 |
| C | 8.94792700  | -1.26306400 | -0.78164700 |
| N | 8.70842500  | 0.90074000  | 0.35459300  |

|                    |   |             |             |             |
|--------------------|---|-------------|-------------|-------------|
|                    | S | 7.41729200  | 1.91396500  | 0.68154200  |
|                    | H | 8.84682500  | -3.14724400 | -1.82789000 |
|                    | H | 10.02619000 | -1.30284300 | -0.60850500 |
| [PC2] <sup>+</sup> |   |             |             |             |
|                    | C | 4.29762900  | -1.25819500 | -2.12833500 |
|                    | C | 4.70730600  | -0.74016200 | -0.88647800 |
|                    | C | 3.74480700  | -0.21319200 | -0.00798900 |
|                    | C | 2.40502600  | -0.20418800 | -0.37393200 |
|                    | C | 2.00965400  | -0.75737100 | -1.60383000 |
|                    | C | 2.95277000  | -1.27985800 | -2.48799700 |
|                    | H | 5.04155700  | -1.67038200 | -2.81161900 |
|                    | H | 4.05717100  | 0.19185200  | 0.95657200  |
|                    | H | 2.64575500  | -1.71292600 | -3.44272800 |
|                    | C | 1.20344000  | 0.31170900  | 0.40815500  |
|                    | C | 0.06311400  | -0.09342500 | -0.51679800 |
|                    | C | -1.29828100 | 0.07539700  | -0.32458700 |
|                    | C | -2.20208300 | -0.37747700 | -1.30542800 |
|                    | C | -1.70098700 | -0.98074200 | -2.47569000 |
|                    | C | -0.33320700 | -1.13469400 | -2.67889400 |
|                    | C | 0.54719600  | -0.69329700 | -1.69101500 |
|                    | H | -1.66760700 | 0.52691500  | 0.59934000  |
|                    | H | -2.39305700 | -1.31323300 | -3.25172700 |
|                    | H | 0.03855200  | -1.59509100 | -3.59680500 |
|                    | C | 6.13329300  | -0.77532800 | -0.47714700 |
|                    | C | 7.19494900  | -0.43947300 | -1.39158100 |
|                    | C | 6.51647700  | -1.11822000 | 0.79767300  |
|                    | C | 8.57726400  | -0.48252200 | -0.96346700 |
|                    | C | 7.88463900  | -1.15634500 | 1.21891700  |
|                    | H | 5.75038000  | -1.39524100 | 1.52536900  |
|                    | C | 8.91259300  | -0.85365000 | 0.37276100  |
|                    | H | 8.09775400  | -1.44457200 | 2.25060600  |
|                    | N | 7.06093800  | -0.05166500 | -2.65894200 |
|                    | N | 9.43178900  | -0.13476200 | -1.92513300 |
|                    | S | 8.55172700  | 0.21872100  | -3.24442700 |
|                    | H | 9.95734900  | -0.88594600 | 0.68460700  |
|                    | C | -3.65756000 | -0.21918300 | -1.11172800 |
|                    | C | -4.17381700 | 0.88464100  | -0.39596200 |
|                    | C | -4.56582500 | -1.16310100 | -1.63674400 |



|   |              |             |             |
|---|--------------|-------------|-------------|
| C | -5.53154000  | 1.04898400  | -0.21994500 |
| H | -3.49371300  | 1.63826400  | 0.00352600  |
| C | -5.92558000  | -1.01437700 | -1.45888300 |
| H | -4.19340100  | -2.03884500 | -2.17055400 |
| C | -6.43659800  | 0.09953300  | -0.75052600 |
| H | -5.89073300  | 1.92181700  | 0.32798200  |
| H | -6.62057700  | -1.75443500 | -1.85715100 |
| C | -7.85188000  | 0.22745800  | -0.59933700 |
| C | -9.94073300  | -0.22977000 | -0.74515600 |
| C | -9.82489900  | 1.03059200  | -0.04501900 |
| C | -11.23011900 | -0.79511900 | -0.98845100 |
| C | -10.93278600 | 1.73887400  | 0.40535100  |
| C | -12.31395700 | -0.09421300 | -0.53864600 |
| H | -11.32112000 | -1.74762800 | -1.51169700 |
| C | -12.16772100 | 1.15774400  | 0.14731600  |
| H | -10.83804000 | 2.69033600  | 0.92845400  |
| H | -13.32141900 | -0.48259400 | -0.69700000 |
| H | -13.07188900 | 1.67177100  | 0.48057200  |
| N | -8.73813500  | -0.68858300 | -1.06880400 |
| N | -8.48627100  | 1.26403900  | 0.01888300  |
| H | -8.04847600  | 2.07703300  | 0.44595300  |
| C | 1.19258100   | 1.85944400  | 0.52294500  |
| C | 2.33514700   | 2.51726500  | 1.29081200  |
| H | 0.23640600   | 2.13910600  | 0.99839200  |
| H | 1.16202800   | 2.27956900  | -0.49701200 |
| C | 2.12847400   | 4.02092600  | 1.45712400  |
| H | 2.44314200   | 2.05871400  | 2.28790800  |
| H | 3.28867700   | 2.34594700  | 0.76524600  |
| C | 3.26837000   | 4.71248900  | 2.19874300  |
| H | 2.00520400   | 4.48515400  | 0.46192600  |
| H | 1.18026000   | 4.20140900  | 1.99492000  |
| H | 3.39737000   | 4.23993400  | 3.18960100  |
| H | 4.21556600   | 4.53963600  | 1.65631800  |
| C | 3.06011300   | 6.21358300  | 2.38202600  |
| C | 4.20162000   | 6.89500100  | 3.12672500  |
| H | 2.11250600   | 6.38351900  | 2.92283200  |
| H | 2.93169700   | 6.68487400  | 1.39162900  |
| H | 4.01959500   | 7.97405100  | 3.24874800  |

|   |             |             |            |
|---|-------------|-------------|------------|
| H | 4.33400900  | 6.46338800  | 4.13250300 |
| H | 5.15657100  | 6.77601900  | 2.58915400 |
| C | 1.08165000  | -0.34920300 | 1.79662500 |
| C | 0.98159400  | -1.87143900 | 1.78431400 |
| H | 0.19450200  | 0.07539700  | 2.29814600 |
| H | 1.95052100  | -0.05149300 | 2.40636600 |
| C | 0.83510200  | -2.46928400 | 3.18048000 |
| H | 0.12096100  | -2.18403700 | 1.16787800 |
| H | 1.87726700  | -2.29796800 | 1.30026700 |
| C | 0.73166800  | -3.99156500 | 3.17985700 |
| H | 1.69437600  | -2.16118000 | 3.80328500 |
| H | -0.06093500 | -2.04306200 | 3.66663100 |
| H | -0.12040800 | -4.29772300 | 2.54585500 |
| H | 1.63239600  | -4.41782800 | 2.70203200 |
| C | 0.56530500  | -4.59853200 | 4.57057900 |
| C | 0.45881700  | -6.11860400 | 4.55583500 |
| H | -0.33422500 | -4.17008800 | 5.04656800 |
| H | 1.41750700  | -4.29388900 | 5.20337800 |
| H | 0.33863800  | -6.52710800 | 5.57134200 |
| H | -0.40593500 | -6.45163700 | 3.95863100 |
| H | 1.35979900  | -6.57720100 | 4.11650900 |

**[EBrP]**

|   |             |             |             |
|---|-------------|-------------|-------------|
| C | -0.57951900 | 0.78933400  | -0.51485300 |
| O | -0.86073500 | 1.27135400  | -1.58305800 |
| O | -1.40126700 | 0.04489000  | 0.20962600  |
| C | -2.70235200 | -0.21984500 | -0.33436000 |
| H | -3.21177400 | 0.73872800  | -0.51680400 |
| H | -2.58264000 | -0.72530900 | -1.30501200 |
| C | -3.45968800 | -1.07476300 | 0.64967800  |
| H | -3.57476400 | -0.56001800 | 1.61516600  |
| H | -4.46217900 | -1.28676600 | 0.25045600  |
| H | -2.94596300 | -2.03266000 | 0.81933300  |
| C | 0.76983900  | 0.98002600  | 0.15913500  |
| H | 1.30466500  | 1.75165600  | -0.40562100 |
| C | 0.69209300  | 1.31245000  | 1.63331900  |
| H | 0.18820100  | 0.51639800  | 2.19765600  |
| H | 1.69687800  | 1.46934300  | 2.04918300  |
| H | 0.12035400  | 2.24594600  | 1.75744800  |

|                           |    |             |             |             |
|---------------------------|----|-------------|-------------|-------------|
| <b>[EBrP]<sup>-</sup></b> | Br | 1.80688600  | -0.66772800 | -0.14376800 |
|                           | C  | 0.90547800  | 0.73429600  | 0.74545600  |
|                           | O  | 1.06531100  | 0.51093300  | 1.93452000  |
|                           | O  | 1.70540600  | 0.18403800  | -0.19613200 |
|                           | C  | 2.68719400  | -0.73627500 | 0.25442100  |
|                           | H  | 3.33242400  | -0.25509900 | 1.00783800  |
|                           | H  | 2.19311900  | -1.58816200 | 0.75122000  |
|                           | C  | 3.49119000  | -1.19415300 | -0.93975900 |
|                           | H  | 3.99346300  | -0.34363000 | -1.42547000 |
|                           | H  | 4.26052800  | -1.91245700 | -0.61970900 |
|                           | H  | 2.84650600  | -1.68781000 | -1.68274300 |
|                           | C  | -0.09455200 | 1.61261000  | 0.19001100  |
|                           | H  | -0.74022600 | 2.09522800  | 0.92433700  |
|                           | C  | -0.17432800 | 1.98345300  | -1.24617000 |
|                           | H  | 0.05277000  | 1.12043000  | -1.88722300 |
|                           | H  | -1.18063400 | 2.34586600  | -1.49817800 |
|                           | H  | 0.54647300  | 2.78540700  | -1.50066700 |
|                           | Br | -2.23885900 | -0.64340400 | -0.05715000 |
| <b>[Et<sub>3</sub>N]</b>  | N  | -0.00267700 | -0.00353000 | 0.02954300  |
|                           | C  | -1.18102400 | -0.76134800 | 0.43218100  |
|                           | C  | -2.40289600 | -0.48966100 | -0.43368200 |
|                           | H  | -1.42617500 | -0.57739800 | 1.50260800  |
|                           | H  | -0.94190300 | -1.83279100 | 0.35890600  |
|                           | H  | -3.24314700 | -1.12919500 | -0.12169500 |
|                           | H  | -2.74268000 | 0.55514400  | -0.36378600 |
|                           | H  | -2.17929500 | -0.70313000 | -1.49064600 |
|                           | C  | 1.23751900  | -0.64481200 | 0.44970800  |
|                           | C  | 1.64288300  | -1.81258800 | -0.43831600 |
|                           | H  | 1.17398200  | -0.97829400 | 1.50980200  |
|                           | H  | 2.04176100  | 0.10504000  | 0.41908900  |
|                           | H  | 2.59523400  | -2.24545200 | -0.09465100 |
|                           | H  | 0.89413300  | -2.61962900 | -0.43349600 |
|                           | H  | 1.77075600  | -1.47610100 | -1.47904700 |
|                           | C  | -0.07371800 | 1.39518000  | 0.43338300  |
|                           | C  | 0.77893800  | 2.31519300  | -0.42861500 |
|                           | H  | 0.20002400  | 1.51770200  | 1.50553000  |

|                                  |             |             |             |
|----------------------------------|-------------|-------------|-------------|
| H                                | -1.12054400 | 1.72310400  | 0.35209900  |
| H                                | 0.63993200  | 3.36450200  | -0.12545500 |
| H                                | 1.85334600  | 2.08948100  | -0.34621600 |
| H                                | 0.49310100  | 2.21994500  | -1.48779600 |
| [Et <sub>3</sub> N] <sup>+</sup> |             |             |             |
| N                                | 0.11093300  | -0.04146700 | -0.32682100 |
| C                                | -0.18367800 | 1.28419600  | 0.16774500  |
| C                                | -1.61127000 | 1.75748900  | 0.00190900  |
| H                                | 0.52473700  | 1.96869200  | -0.32675800 |
| H                                | 0.10887800  | 1.28319100  | 1.23602500  |
| H                                | -1.67564600 | 2.77460300  | 0.41208100  |
| H                                | -1.90348400 | 1.80087200  | -1.05714400 |
| H                                | -2.32710200 | 1.13003200  | 0.55061400  |
| C                                | 1.48687600  | -0.46608500 | -0.48690500 |
| C                                | 2.49792700  | 0.19892200  | 0.42552700  |
| H                                | 1.72675800  | -0.27075200 | -1.55176000 |
| H                                | 1.50085500  | -1.55918300 | -0.36604100 |
| H                                | 3.47513600  | -0.26609600 | 0.23648100  |
| H                                | 2.59815400  | 1.27627000  | 0.23849700  |
| H                                | 2.24222100  | 0.03903200  | 1.48298800  |
| C                                | -0.92509700 | -1.00669500 | -0.61517600 |
| C                                | -1.33362500 | -1.74699700 | 0.66243200  |
| H                                | -0.52333800 | -1.71281400 | -1.35446500 |
| H                                | -1.78565400 | -0.48745900 | -1.05376600 |
| H                                | -2.10042400 | -2.48830800 | 0.39966100  |
| H                                | -0.47264100 | -2.26947400 | 1.10284100  |
| H                                | -1.75178200 | -1.05332100 | 1.40529300  |

## 5. References

1. C. Liao, Y. Gong, Y. Che, L. Cui, Y. Liu, H. Ji, Y. Zhang, L. Zang, J. Zhao and Y. Che, *Chem. Eur. J.*, 2023, **29**, e202301747.
2. C. Adamo and V. Barone, *J. Chem. Phys.*, 1999, **110**, 6158-6170.
3. J.-D. Chai and M. Head-Gordon, *Phys. Chem. Chem. Phys.*, 2008, **10**, 6615-6620.
4. A. V. Marenich, C. J. Cramer and D. G. Truhlar, *J. Phys. Chem. B*, 2009, **113**, 6378-6396.
5. F. Weigend and R. Ahlrichs, *Phys. Chem. Chem. Phys.*, 2005, **7**, 3297-3305.
